# Supplementary material for: RNAseq expression patterns of canine invasive urothelial carcinoma reveal two distinct tumor clusters and shared regions of dysregulation with human bladder tumors
Source: BMC Cancer. 2020 Mar 24;20:251. doi: 10.1186/s12885-020-06737-0 (PMC7092566; doi:10.1186/s12885-020-06737-0)
Supplement: Supplementary file 1 — Additional file 1:. Figures S1–S4. Supporting figures for results. [file 12885_2020_6737_MOESM1_ESM.xlsx]

## Sheet: SupT1
Supplemental Table 1. Expression of Ensembl annotated genes in tumors compared to normals tissues.
		All			BRAFV595E			BRAFwt
Ensembl Gene	Gene Symbol	log2Fold Change	padj		log2Fold Change	padj		log2Fold Change	padj
ENSCAFG00000000001	ENPP1	0.67641	0.466953		0.821748	0.347175		0.0670513	0.962913
ENSCAFG00000000002	ENSCAFG00000000002	-0.946627	0.604064		-0.89981	NA		-1.69917	NA
ENSCAFG00000000005	PARD6G	-0.874779	0.181328		-1.04783	0.0682642		0.612261	0.582164
ENSCAFG00000000006	ENSCAFG00000000006	-0.262295	NA		-0.401028	NA		-0.417496	NA
ENSCAFG00000000007	ADNP2	0.0399741	0.898279		0.0437264	0.896009		0.192244	0.754949
ENSCAFG00000000008	TXNL4A	0.971822	0.00722147		0.89424	0.00594124		1.51516	0.0225685
ENSCAFG00000000009	PQLC1	0.359053	0.210956		0.431066	0.0647265		0.237591	0.710756
ENSCAFG00000000010	CTDP1	-0.088449	0.707533		-0.042495	0.85111		-0.290027	0.574816
ENSCAFG00000000011	NFATC1	-1.10006	0.0144325		-0.989767	0.0243487		-1.64381	0.0223426
ENSCAFG00000000012	ATP9B	0.858888	0.000345034		0.901615	0.000682043		0.791698	0.0163013
ENSCAFG00000000013	SALL3	0.038327	0.988462		-0.392964	0.882933		7.27405	NA
ENSCAFG00000000014	ENSCAFG00000000014	0.67401	NA		0.692708	NA		0.544292	NA
ENSCAFG00000000015	GALR1	0.552342	0.750392		-0.266634	NA		1.76117	0.463201
ENSCAFG00000000016	MBP	-0.265433	0.709971		-0.310231	0.682248		1.06754	0.211346
ENSCAFG00000000017	ZNF236	-0.541989	0.197888		-0.544678	0.172545		-0.640327	0.339399
ENSCAFG00000000019	ZNF516	-1.83906	0.00124553		-1.70511	0.00338127		-2.57549	0.00017316
ENSCAFG00000000020	TSHZ1	-1.10611	0.00902302		-0.867827	0.0107477		-2.2209	1.1312e-05
ENSCAFG00000000021	ZADH2	0.211969	0.620393		0.217613	0.596827		0.542234	0.496187
ENSCAFG00000000022	ZNF407	-0.47236	0.0418058		-0.390241	0.0833284		-0.811483	0.0378576
ENSCAFG00000000024	CNDP1	2.37722	2.95235e-05		2.36331	2.14574e-05		2.80945	0.00393653
ENSCAFG00000000025	FAM69C	-0.722124	NA		-0.735956	NA		-1.27116	NA
ENSCAFG00000000026	CYB5A	1.62561	0.0226622		1.88214	0.000118969		0.100288	0.934105
ENSCAFG00000000027	RPL34	-0.00362303	0.997705		0.138533	0.90596		-0.440931	0.862576
ENSCAFG00000000028	TIMM21	0.00453617	0.990377		0.0705135	0.828967		-0.158377	0.776009
ENSCAFG00000000029	FBXO15	0.273675	0.758914		0.193693	0.850648		0.47346	0.752648
ENSCAFG00000000030	ENSCAFG00000000030	-0.532491	0.307372		-0.255305	0.582924		-1.97601	0.0137752
ENSCAFG00000000031	NETO1	-2.20799	0.328066		-3.0087	0.0587418		2.72748	0.215999
ENSCAFG00000000032	CBLN2	-2.97249	0.0318692		-4.45367	5.21874e-07		-0.99541	0.636988
ENSCAFG00000000033	MTCH2	0.253067	0.586153		0.373145	0.388517		-0.254486	0.788291
ENSCAFG00000000035	ENSCAFG00000000035	0.245853	NA		NA	NA		1.21415	NA
ENSCAFG00000000036	SOCS6	-0.584732	0.208795		-0.408279	0.331372		-1.43861	0.0258292
ENSCAFG00000000037	RTTN	-0.128384	0.823892		0.0523808	0.917816		-0.951781	0.210091
ENSCAFG00000000038	CD226	-2.3633	0.00117559		-2.62467	0.000871494		-2.18686	0.0191989
ENSCAFG00000000039	DOK6	-4.09481	9.7272e-06		-4.04114	2.9109e-05		-4.44189	0.000127058
ENSCAFG00000000040	CCDC102B	-1.64215	0.150731		-1.81492	0.101007		0.430593	0.841822
ENSCAFG00000000041	ENSCAFG00000000041	0.886445	0.634866		1.11427	0.530559		-0.516719	NA
ENSCAFG00000000042	ENSCAFG00000000042	0.917505	0.361159		0.797656	0.475275		1.09509	0.534474
ENSCAFG00000000043	TMX3	0.028397	0.96375		0.137072	0.765275		-0.461386	0.629839
ENSCAFG00000000044	ENSCAFG00000000044	0.338932	NA		0.44059	NA		NA	NA
ENSCAFG00000000045	ENSCAFG00000000045	3.25833	0.0391695		3.30778	0.0537314		3.12946	NA
ENSCAFG00000000047	DSEL	-1.62526	0.0199742		-1.65436	0.0297561		-1.82555	0.00309097
ENSCAFG00000000049	ENSCAFG00000000049	-0.337949	0.778369		-0.0782726	0.950783		-1.66603	NA
ENSCAFG00000000052	CDH19	-5.02504	0.0512844		-8.67004	1.23044e-13		-3.79988	0.213942
ENSCAFG00000000054	ENSCAFG00000000054	0.00511977	0.994213		0.0628733	0.928751		0.0511563	0.952658
ENSCAFG00000000056	CDH7	3.05354	0.0317778		2.95392	0.0617526		3.01378	0.0164416
ENSCAFG00000000058	SERPINB8	1.79476	6.32172e-05		1.87149	0.000155339		1.99078	0.00533283
ENSCAFG00000000059	SERPINB2	-6.33672	NA		-5.90788	NA		-7.85519	NA
ENSCAFG00000000060	ITGA7	0.25623	0.61304		0.113173	0.84252		0.318504	0.651839
ENSCAFG00000000061	BLOC1S1	0.249618	0.604384		0.00938357	0.9855		1.13832	0.028841
ENSCAFG00000000062	SERPINB3	5.2005	0.00117541		5.03981	0.00276787		5.40684	0.00808763
ENSCAFG00000000063	RDH5	0.05539	0.957781		-0.747704	0.277493		0.846388	0.365852
ENSCAFG00000000064	CD63	1.46495	2.4923e-05		1.42333	0.000120959		2.1242	2.71666e-05
ENSCAFG00000000065	GDF11	-2.24933	4.84855e-05		-2.61247	7.97195e-16		-1.50507	0.159077
ENSCAFG00000000066	VPS4B	0.285732	0.415958		0.361412	0.248729		0.230185	0.70695
ENSCAFG00000000067	KDSR	0.270484	0.477868		0.249659	0.554324		0.577438	0.379692
ENSCAFG00000000068	BCL2	-1.62017	6.9064e-05		-1.58086	0.000610994		-1.66599	0.00187568
ENSCAFG00000000069	Dnajc14	0.259522	0.24357		0.235581	0.362557		0.520469	0.0990128
ENSCAFG00000000070	PHLPP1	0.137514	0.708573		0.172576	0.654093		0.383248	0.476761
ENSCAFG00000000071	ORMDL2	1.32713	4.51179e-05		1.28386	0.000109318		2.01833	0.000468314
ENSCAFG00000000072	Tmem198b	-1.75904	0.00109039		-2.01601	1.99509e-05		-0.92614	0.436177
ENSCAFG00000000073	ZCCHC2	-0.472723	0.406		-0.277534	0.622399		-1.36751	0.0201371
ENSCAFG00000000074	MMP19	-1.49896	0.0360552		-1.75947	0.00919319		-0.541636	0.746413
ENSCAFG00000000075	TNFRSF11A	-0.63204	0.221805		-0.728641	0.180689		-0.266959	0.802461
ENSCAFG00000000076	PYM1	0.649951	0.147406		0.39825	0.272836		1.91655	8.87744e-05
ENSCAFG00000000078	DGKA	0.261603	0.440915		0.253865	0.43039		0.19516	0.752059
ENSCAFG00000000079	KIAA1468	0.311052	0.462758		0.342517	0.353091		0.33124	0.667411
ENSCAFG00000000080	PMEL	0.0434894	0.973352		-1.10484	0.0841345		1.10194	0.375673
ENSCAFG00000000081	ENSCAFG00000000081	1.53425	0.0298467		1.7052	0.0187085		0.764721	0.55582
ENSCAFG00000000082	CDK2	1.05844	0.000103315		0.994845	0.000412563		1.34134	0.0155497
ENSCAFG00000000083	PIGN	1.18494	3.88143e-05		1.21281	8.19535e-07		1.3203	0.0342655
ENSCAFG00000000087	RAB5B	-0.00197545	0.995977		0.00758506	0.985298		-0.171595	0.762865
ENSCAFG00000000088	SUOX	-0.546508	0.368664		-0.903682	0.0324863		0.18546	0.858405
ENSCAFG00000000093	CCBE1	-2.4743	0.0735732		-2.92266	0.019069		-1.0805	0.582902
ENSCAFG00000000094	LMAN1	0.321029	0.505521		0.464452	0.23117		-0.290939	0.753483
ENSCAFG00000000097	ERBB3	2.38368	6.49356e-05		2.32522	0.000411064		4.1925	3.58302e-08
ENSCAFG00000000098	RAX	1.51326	NA		1.79586	NA		0.544292	NA
ENSCAFG00000000099	GRP	-0.10783	NA		0.104434	NA		-1.13882	NA
ENSCAFG00000000100	SEC11C	0.24348	0.638645		0.361796	0.478726		-0.0324774	0.95015
ENSCAFG00000000101	Oacyl	-1.30649	0.312517		-1.30545	0.356792		-1.68381	NA
ENSCAFG00000000102	PA2G4	0.297264	0.27879		0.404163	0.0995532		-0.205133	0.688333
ENSCAFG00000000103	ZNF532	-2.09634	0.00141184		-1.68975	0.000595695		-4.12026	7.75998e-07
ENSCAFG00000000104	ZC3H10	-0.938821	0.00329387		-0.987415	0.00216424		-1.03775	0.0414721
ENSCAFG00000000105	MALT1	-0.999716	0.0840174		-0.80766	0.164943		-1.93526	0.00858444
ENSCAFG00000000106	ENSCAFG00000000106	0.265863	NA		0.507177	NA		-1.2005	NA
ENSCAFG00000000107	ALPK2	-5.52157	NA		-5.65174	NA		-5.97507	NA
ENSCAFG00000000108	ESYT1	-0.67155	0.15233		-0.483474	0.351176		-1.59111	0.000125327
ENSCAFG00000000109	SMARCC2	0.126845	0.643546		0.162128	0.499348		-0.0314962	0.961263
ENSCAFG00000000110	MYL6B	-1.23528	0.00190203		-1.38634	0.00118302		-1.03382	0.0587417
ENSCAFG00000000111	RNF41	-0.485606	0.00724387		-0.497136	0.0109159		-0.49218	0.296529
ENSCAFG00000000112	SLC39A5	0.190205	0.814573		-0.418786	0.376496		1.13963	0.149534
ENSCAFG00000000113	ANKRD52	-0.546702	0.313444		-0.434787	0.463132		-1.24562	0.0213778
ENSCAFG00000000115	CS	-0.248784	0.449038		-0.284861	0.381268		-0.442522	0.388149
ENSCAFG00000000116	NEDD4L	-0.179855	0.725984		-0.102649	0.833396		-0.643345	0.394124
ENSCAFG00000000118	Cnpy2	0.655366	0.0278986		0.603224	0.0592618		0.982603	0.0414721
ENSCAFG00000000119	PAN2	-0.350049	0.218461		-0.359093	0.195485		-0.455318	0.40572
ENSCAFG00000000120	IL23A	-1.38188	0.00393502		-1.57129	0.00279931		-1.21584	0.0242867
ENSCAFG00000000121	STAT2	0.279394	0.654033		0.0795105	0.912288		1.17078	0.0436033
ENSCAFG00000000122	APOF	2.20493	0.0856933		2.03769	0.148939		3.69248	0.0714107
ENSCAFG00000000123	ATP8B1	1.16375	0.0267811		1.09477	0.0462967		2.31619	0.00145534
ENSCAFG00000000124	TIMELESS	0.97379	0.00134761		1.09883	0.000113192		0.457672	0.525604
ENSCAFG00000000125	NARS	0.743113	0.00879324		0.803686	0.00685801		0.551867	0.369677
ENSCAFG00000000126	FECH	0.490472	0.073891		0.502	0.0374337		0.344693	0.573784
ENSCAFG00000000127	ONECUT2	2.25027	NA		1.6268	NA		3.04329	NA
ENSCAFG00000000128	MIP	-0.78277	NA		-2.33371	NA		0.947401	NA
ENSCAFG00000000129	ST8SIA3	-1.15454	NA		-1.26821	NA		-1.33017	NA
ENSCAFG00000000130	SPRYD4	-0.0374089	0.935562		-0.0626745	0.893935		0.415478	0.528276
ENSCAFG00000000131	GLS2	-1.85365	7.90321e-05		-1.95133	0.000191042		-2.09779	0.00133444
ENSCAFG00000000132	ENSCAFG00000000132	0.459653	0.295472		0.491052	0.195036		0.518501	0.652603
ENSCAFG00000000133	WDR7	-0.0326773	0.960783		0.148059	0.767842		-0.827689	0.275895
ENSCAFG00000000134	RBMS2	-0.607614	0.447175		-0.329237	0.663083		-2.13037	0.000257024
ENSCAFG00000000135	BAZ2A	0.49764	0.0333162		0.451411	0.076618		0.726388	0.0274968
ENSCAFG00000000136	ATP5B	0.145214	0.751566		0.167308	0.727721		-0.0941744	0.890693
ENSCAFG00000000137	TXNL1	0.314554	0.474992		0.46801	0.182031		-0.241918	0.700934
ENSCAFG00000000140	TCF4	-1.50804	0.00786785		-1.67687	0.00023883		-1.10298	0.317465
ENSCAFG00000000141	NACA	-0.328322	0.39161		-0.200779	0.622286		-0.908018	0.0696069
ENSCAFG00000000142	PRIM1	0.424686	0.182381		0.452865	0.201134		0.313152	0.577523
ENSCAFG00000000143	HSD17B6	0.421031	0.668323		-0.151693	0.867394		2.45531	7.83111e-05
ENSCAFG00000000144	CCDC68	1.94039	7.98527e-05		1.83107	0.000182086		3.05987	3.75128e-05
ENSCAFG00000000145	RAB27B	2.06467	0.00124938		1.97356	0.00288024		3.4523	0.00103772
ENSCAFG00000000147	C18orf54	-0.416225	0.493641		-0.172845	0.761496		-1.5365	0.0556517
ENSCAFG00000000148	RDH16	2.35768	0.0218397		2.12214	0.0182633		4.67144	0.00173109
ENSCAFG00000000149	STARD6	-1.90467	0.000409748		-1.74094	0.00208557		-2.79485	0.000855113
ENSCAFG00000000150	POLI	-0.599295	0.0584814		-0.563695	0.0690915		-0.715293	0.231649
ENSCAFG00000000153	ENSCAFG00000000153	-0.386524	0.450667		-0.445113	0.244807		-0.452618	0.65084
ENSCAFG00000000155	TAC3	1.09978	NA		0.972776	NA		1.21864	NA
ENSCAFG00000000156	MYO1A	0.894334	0.408384		0.375423	0.759367		1.9008	0.151319
ENSCAFG00000000157	DCC	2.29464	0.00706576		2.35903	0.00134126		2.63447	0.118555
ENSCAFG00000000158	HSD17B4	0.335113	0.247943		0.307538	0.245706		0.626377	0.237557
ENSCAFG00000000159	NEMP1	0.586747	0.0392218		0.639271	0.0263025		0.426681	0.423207
ENSCAFG00000000160	NAB2	-0.338685	0.511255		-0.324353	0.562912		-0.547045	0.311698
ENSCAFG00000000162	MEX3C	0.4824	0.237108		0.695083	0.00299988		-0.477166	0.438668
ENSCAFG00000000163	STAT6	0.355071	0.262113		0.341088	0.347007		0.449598	0.465982
ENSCAFG00000000164	SMAD4	-0.306202	0.334943		-0.162891	0.515394		-0.947412	0.0570557
ENSCAFG00000000165	TNFAIP8	-0.608614	0.229081		-0.492002	0.340504		-0.876179	0.359083
ENSCAFG00000000166	ELAC1	-0.642727	0.0163842		-0.541102	0.0154473		-1.12545	0.0243998
ENSCAFG00000000167	DMXL1	-0.999174	0.0240235		-0.98612	0.020472		-1.15108	0.1089
ENSCAFG00000000168	ME2	0.23518	0.566142		0.221885	0.575812		0.325683	0.682404
ENSCAFG00000000170	MC2R	0.43201	NA		0.468606	NA		NA	NA
ENSCAFG00000000172	RNMT	-0.11085	0.824103		0.0178332	0.968173		-0.70291	0.373068
ENSCAFG00000000173	FAM210A	-0.223166	0.478432		-0.105481	0.715361		-0.759158	0.127074
ENSCAFG00000000175	DTWD2	-0.612977	0.289625		-0.488236	0.434299		-1.32571	0.0758423
ENSCAFG00000000177	ENSCAFG00000000177	0.220061	0.899146		0.304972	0.870875		-0.245457	NA
ENSCAFG00000000178	LRP1	-1.44439	0.00311055		-1.6697	0.000568289		-1.17647	0.0764886
ENSCAFG00000000183	ENSCAFG00000000183	2.94534	0.193357		3.01458	0.290996		2.64213	NA
ENSCAFG00000000184	MOXD1	-2.27262	0.0209102		-2.89655	0.000489205		-1.12477	0.532632
ENSCAFG00000000185	STX7	-0.334115	0.0964515		-0.297086	0.120558		-0.574432	0.182601
ENSCAFG00000000188	ENSCAFG00000000188	0.616365	0.548171		0.890196	0.322722		-1.03864	0.651621
ENSCAFG00000000189	SLC18B1	-0.295444	0.782903		-0.841052	0.227643		1.98187	0.0211894
ENSCAFG00000000190	RPS12	0.0962304	0.871639		0.212713	0.71849		-0.438304	0.429096
ENSCAFG00000000191	ENSCAFG00000000191	0.966856	NA		0.737323	NA		2.20472	NA
ENSCAFG00000000192	SEMA6A	-0.141947	0.915088		-0.641244	0.528111		1.05605	0.47294
ENSCAFG00000000194	INHBC	-0.442902	NA		-0.399801	NA		-1.13882	NA
ENSCAFG00000000195	SHMT2	0.722771	0.0722507		0.639432	NA		0.665128	0.449945
ENSCAFG00000000196	EYA4	-5.35945	1.58787e-08		-5.91029	3.10267e-08		-5.38408	1.20425e-06
ENSCAFG00000000197	COMMD10	-0.244189	0.320101		-0.180966	0.501506		-0.336186	0.346939
ENSCAFG00000000199	LVRN	-6.11685	1.62131e-13		-5.8691	1.60126e-12		-7.19328	6.99842e-08
ENSCAFG00000000200	NDUFA4L2	0.263031	0.827153		0.296982	0.786906		0.00558353	0.997956
ENSCAFG00000000201	STAC3	1.26538	0.0587082		0.754909	0.192872		2.27174	0.00223093
ENSCAFG00000000203	AP3S1	0.967556	0.0298173		1.21159	9.81832e-07		-0.192096	0.813431
ENSCAFG00000000204	ATG12	0.437215	0.204893		0.506373	0.158821		0.419788	0.357886
ENSCAFG00000000205	TCF21	-3.41441	3.27824e-08		-3.63278	1.5588e-11		-2.64683	0.00938222
ENSCAFG00000000206	CDO1	-1.57487	0.0756702		-1.64599	0.101433		-1.33822	0.275895
ENSCAFG00000000207	TBPL1	-0.176557	0.573487		-0.0794859	0.801842		-0.54246	0.305214
ENSCAFG00000000209	TMED7-TICAM2	0.161431	0.703504		0.26328	0.484898		-0.0413972	0.950495
ENSCAFG00000000210	FEM1C	0.45887	0.43225		0.717988	0.0268476		-0.822087	0.31168
ENSCAFG00000000211	ENSCAFG00000000211	-0.652933	NA		-0.757665	NA		0.247834	NA
ENSCAFG00000000212	SLC2A12	-1.54246	0.0127719		-1.45752	0.0131503		-1.5905	0.145989
ENSCAFG00000000213	ENSCAFG00000000213	0.299693	0.893585		0.377909	NA		-0.0724554	NA
ENSCAFG00000000214	CCDC112	0.060798	0.905593		0.174673	0.67741		-0.0674726	0.922763
ENSCAFG00000000215	R3HDM2	0.210843	0.467674		0.126512	0.608743		0.428686	0.425981
ENSCAFG00000000216	PGGT1B	-0.417279	0.0452174		-0.39709	0.0930663		-0.531146	0.244436
ENSCAFG00000000217	SGK1	0.801878	0.191314		0.832647	0.22231		1.15097	0.295995
ENSCAFG00000000219	TRIM36	1.61493	0.000213305		1.7418	8.64603e-05		1.51412	0.00923213
ENSCAFG00000000220	KCNN2	-3.36812	0.000299567		-4.51835	2.87003e-08		-2.25075	0.00145741
ENSCAFG00000000221	ALDH8A1	-0.243804	0.845779		-0.876663	0.330165		2.46438	0.0376876
ENSCAFG00000000223	GLI1	-2.59311	2.55899e-05		-2.94918	6.75262e-08		-1.73056	0.11213
ENSCAFG00000000224	YTHDC2	-0.718323	0.013939		-0.779262	0.00680498		-0.624744	0.207243
ENSCAFG00000000225	ARHGAP9	0.472899	0.598546		0.141166	0.881219		2.16138	0.102192
ENSCAFG00000000226	HBS1L	-0.507188	0.0195696		-0.421563	0.00564402		-0.874192	0.0541959
ENSCAFG00000000228	TMED9	0.159075	0.723092		0.150757	0.761154		0.652272	0.275895
ENSCAFG00000000229	MARS	0.584169	0.0267672		0.587768	0.0453774		0.355259	0.566626
ENSCAFG00000000230	MYB	1.38259	0.0577724		1.51855	0.0504149		1.21787	0.201552
ENSCAFG00000000231	B4GALT7	0.34829	0.375758		0.307044	0.441953		0.751708	0.21172
ENSCAFG00000000233	DCTN2	0.180682	0.401875		0.191494	0.332121		0.160165	0.77261
ENSCAFG00000000234	AHI1	-1.83975	6.6933e-06		-1.69375	0.000108327		-2.60821	1.56287e-08
ENSCAFG00000000235	N4BP3	0.37476	0.609525		0.287478	0.711987		1.73378	0.0551653
ENSCAFG00000000236	RMND5B	0.0680332	0.805629		0.076877	0.798403		0.117604	0.803913
ENSCAFG00000000237	ENSCAFG00000000237	-0.620697	0.42122		-0.806715	0.266439		0.256064	0.852432
ENSCAFG00000000238	KIF5A	-0.460602	0.565983		-0.681889	0.388541		-0.667002	0.43156
ENSCAFG00000000239	PDE7B	-0.582428	0.468714		-0.457731	0.581866		-0.824856	0.546795
ENSCAFG00000000240	NHP2	0.361328	0.44525		0.348722	0.50666		0.994034	0.104564
ENSCAFG00000000241	HNRNPAB	0.648286	0.0784524		0.784093	0.0238179		0.226944	0.752951
ENSCAFG00000000242	PHYKPL	0.570777	0.0971492		0.712915	0.0227301		0.0968686	0.884672
ENSCAFG00000000244	MTFR2	1.0473	0.0510102		1.29625	0.00305374		-0.159241	0.886908
ENSCAFG00000000245	BCLAF1	-0.263429	0.558514		-0.148553	0.730191		-0.748561	0.340256
ENSCAFG00000000246	COL23A1	-3.13745	2.67001e-05		-2.93982	0.000110648		-3.95222	1.25913e-05
ENSCAFG00000000247	MAP7	1.50431	0.0203255		1.61976	0.0148317		1.78774	0.0952975
ENSCAFG00000000248	CLK4	-0.401637	0.239596		-0.455141	0.174267		-0.190291	0.798253
ENSCAFG00000000249	PIP4K2C	1.02027	0.000890939		0.909202	0.00224093		1.76384	0.000626973
ENSCAFG00000000250	ARHGEF25	-5.02847	1.97437e-13		-5.96624	9.11123e-23		-4.67144	7.44126e-08
ENSCAFG00000000251	MAP3K5	0.586864	0.383399		0.744826	0.209673		0.231198	0.834092
ENSCAFG00000000252	SLC26A10	-1.95307	0.0174198		-2.69626	6.73985e-05		-1.17741	0.374029
ENSCAFG00000000253	PEX7	0.104544	0.801149		0.109976	0.806871		0.489138	0.326005
ENSCAFG00000000255	B4GALNT1	-4.42248	0.000945798		-5.02789	0.000336024		-3.40903	0.0807794
ENSCAFG00000000256	SLC35D3	-2.26392	NA		-2.14801	NA		-3.1243	0.300446
ENSCAFG00000000257	IL20RA	1.33564	0.300022		1.53747	0.19793		0.114177	0.951641
ENSCAFG00000000258	IL22RA2	1.28141	0.276219		1.58813	0.199082		-0.126153	0.963659
ENSCAFG00000000259	OS9	0.65858	0.00557929		0.634443	0.00722159		0.991534	0.0200482
ENSCAFG00000000260	IFNGR1	0.23691	0.592392		0.339622	0.408551		0.10156	0.888126
ENSCAFG00000000261	RPA3	-0.0601199	0.959173		-0.453952	0.665946		2.22534	0.0796884
ENSCAFG00000000263	ENSCAFG00000000263	0.350044	NA		0.267527	NA		0.722119	NA
ENSCAFG00000000265	OLIG3	-3.41675	0.0594976		-4.28375	0.001308		-0.988372	0.734138
ENSCAFG00000000267	TNFAIP3	-2.94095	NA		-2.57066	NA		-4.37941	NA
ENSCAFG00000000268	PROP1	-0.53598	NA		-0.679935	NA		-0.417483	NA
ENSCAFG00000000271	Olfr1377	0.413389	NA		0.160456	NA		1.34972	NA
ENSCAFG00000000272	ARFGEF3	1.41839	0.0424802		1.18067	0.0207833		2.71244	0.0189273
ENSCAFG00000000273	AGAP2	-0.240696	0.798138		-0.81147	0.147435		1.6906	0.0562137
ENSCAFG00000000274	HEBP2	0.373271	0.360398		0.362481	0.424047		0.819252	0.16078
ENSCAFG00000000275	NHSL1	1.78142	6.98956e-06		1.78374	1.37156e-05		2.33531	0.00115126
ENSCAFG00000000277	CCDC28A	-1.14248	0.00457183		-1.10302	0.0140876		-1.08263	0.255229
ENSCAFG00000000278	TSPAN31	0.362679	0.332131		0.258283	0.502106		1.13566	0.0153102
ENSCAFG00000000279	REPS1	-0.424105	0.238605		-0.217957	0.456262		-1.35957	0.000520371
ENSCAFG00000000280	CDK4	0.451102	0.0862901		0.480231	0.0762013		0.430109	0.47642
ENSCAFG00000000281	ABRACL	1.5728	1.45921e-05		1.69088	8.62495e-06		1.29654	0.0731379
ENSCAFG00000000282	HECA	-0.37067	0.54529		-0.293529	0.576828		-0.580865	0.566048
ENSCAFG00000000283	TXLNB	-1.36615	0.363397		-1.56735	0.268115		1.41221	0.576594
ENSCAFG00000000285	CITED2	-2.17706	0.000165211		-2.19759	0.000781366		-2.46676	5.83574e-06
ENSCAFG00000000287	CYP27B1	0.932569	0.404762		0.518594	0.662949		1.14886	0.456435
ENSCAFG00000000288	ENSCAFG00000000288	-0.602067	0.200356		-0.480255	0.359735		-1.14324	0.193766
ENSCAFG00000000289	ENSCAFG00000000289	-0.133073	0.908904		-0.025326	0.98475		-0.564633	0.780963
ENSCAFG00000000290	METTL1	0.00181478	0.997705		-0.156524	0.796758		0.0110138	0.992241
ENSCAFG00000000291	ENSCAFG00000000291	-0.890205	0.576211		-0.443994	0.779136		-3.34254	NA
ENSCAFG00000000293	EEF1AKMT3	-0.0162026	0.960751		-0.0450517	0.881314		-0.071405	0.9066
ENSCAFG00000000294	NMBR	-0.263433	NA		-0.100693	NA		-0.177071	NA
ENSCAFG00000000295	VTA1	-0.160792	0.690512		-0.0210498	0.954456		-0.624589	0.236156
ENSCAFG00000000296	ADGRG6	-0.31502	0.764442		-0.468157	0.62737		0.858476	0.525153
ENSCAFG00000000297	AVIL	0.132096	0.917452		0.335343	0.7695		-0.716401	0.483901
ENSCAFG00000000300	HIVEP2	-1.22866	0.0150107		-1.07986	0.0411704		-1.99711	0.000379176
ENSCAFG00000000303	AIG1	0.041593	0.949575		0.042923	0.951086		0.422491	0.491349
ENSCAFG00000000305	ADAT2	-1.36719	5.36856e-05		-1.22168	0.000465545		-2.1352	1.2292e-05
ENSCAFG00000000307	PEX3	-0.0368965	0.913484		0.0759541	0.693675		-0.427701	0.424801
ENSCAFG00000000308	CTDSP2	-0.251093	0.637452		-0.0235143	0.957095		-1.3007	0.0607466
ENSCAFG00000000309	FUCA2	-0.0406971	0.937486		-0.0733243	0.881471		0.58278	0.328688
ENSCAFG00000000310	ATP23	-0.594074	0.122787		-0.635456	0.0999834		-0.637478	0.340409
ENSCAFG00000000311	LRIG3	-1.23344	4.01253e-05		-1.12991	0.000752621		-1.82473	1.3244e-06
ENSCAFG00000000312	PHACTR2	-0.663917	0.261702		-0.692672	0.187773		-0.368138	0.731261
ENSCAFG00000000314	LTV1	-0.0742236	0.854719		0.0409047	0.913176		-0.630382	0.309638
ENSCAFG00000000316	SLC16A7	-2.26449	0.00791899		-3.57995	1.44635e-22		-0.266889	0.768252
ENSCAFG00000000317	ZC2HC1B	-0.0817966	0.93872		0.168458	0.870143		-1.34315	0.245646
ENSCAFG00000000318	PLAGL1	-0.731161	0.208824		-0.623961	0.237321		-1.01144	0.312991
ENSCAFG00000000320	SERF2	0.564882	0.164279		0.452521	0.266207		1.16164	0.0326886
ENSCAFG00000000322	STX11	0.619912	0.409345		0.633002	0.394416		1.11529	0.386469
ENSCAFG00000000323	USP15	-0.230873	0.47434		-0.159398	0.652991		-0.566261	0.170341
ENSCAFG00000000324	ENSCAFG00000000324	-0.168278	0.895832		-0.620907	0.545739		2.19581	0.288727
ENSCAFG00000000326	UTRN	-1.41575	0.0306443		-1.08673	0.0365312		-2.93171	0.000677303
ENSCAFG00000000327	ENSCAFG00000000327	0.0587003	0.939962		0.178879	0.823168		-0.324646	0.703706
ENSCAFG00000000329	EPM2A	-2.76728	7.18568e-08		-2.7954	4.19279e-07		-3.17557	0.000273649
ENSCAFG00000000330	FBXO30	-1.5207	0.000202074		-1.28325	0.000181207		-2.60378	2.9083e-06
ENSCAFG00000000331	ENSCAFG00000000331	1.37141	0.371703		1.1634	0.520011		1.16588	NA
ENSCAFG00000000333	MON2	-0.133374	0.844052		0.026677	0.972159		-0.835877	0.0884061
ENSCAFG00000000334	ADAMTS2	-2.44799	0.000409748		-2.25226	0.0011596		-3.27098	0.0045955
ENSCAFG00000000335	SHPRH	-0.346992	0.363523		-0.246716	0.295314		-0.713009	0.34852
ENSCAFG00000000336	HNRNPH1	0.165233	0.640772		0.141418	0.712734		0.0712162	0.9066
ENSCAFG00000000337	PPM1H	0.949596	0.120512		0.908994	0.156486		1.81442	0.00876915
ENSCAFG00000000338	GRM1	2.00093	0.129993		1.39264	NA		3.30328	0.0303146
ENSCAFG00000000339	AVPR1A	-4.56099	3.15224e-07		-4.36855	9.53484e-09		-5.24508	NA
ENSCAFG00000000340	LOC102155476	-0.670572	0.319677		-0.520971	0.456576		-1.42592	0.194598
ENSCAFG00000000341	RXYLT1	-0.241285	0.397687		-0.259363	0.368649		-0.23513	0.699199
ENSCAFG00000000344	RUFY1	-0.0466761	0.859304		-0.0640688	0.824189		-0.0277215	0.95015
ENSCAFG00000000345	SRGAP1	-1.33433	0.0552034		-1.22419	0.117899		-2.03949	0.0612688
ENSCAFG00000000347	CBY3	-1.09236	NA		-0.82729	NA		-2.366	NA
ENSCAFG00000000348	CANX	0.337913	0.380096		0.525226	0.0415557		-0.433789	0.444478
ENSCAFG00000000350	MAML1	-0.252795	0.550718		-0.0394713	0.89904		-1.21056	0.000334405
ENSCAFG00000000351	C12orf56	-1.3674	0.00434723		-1.59436	0.000598853		-1.20993	0.153935
ENSCAFG00000000352	XPOT	0.093212	0.76062		0.0538018	0.872074		0.103129	0.878169
ENSCAFG00000000353	STXBP5	-0.0659529	0.925125		-0.146062	0.766899		0.520209	0.637909
ENSCAFG00000000354	LTC4S	1.58126	0.184832		1.43573	0.217569		2.28657	NA
ENSCAFG00000000355	MGAT4B	2.36137	2.0415e-06		2.54015	4.69086e-09		1.81506	0.000700493
ENSCAFG00000000356	TBK1	0.316099	0.157676		0.332373	0.157813		0.246243	0.571494
ENSCAFG00000000359	GNS	0.0855577	0.869553		-0.0900041	0.857283		0.796636	0.0872388
ENSCAFG00000000360	SQSTM1	1.44641	0.00534453		1.71045	6.53199e-06		0.127913	0.884305
ENSCAFG00000000361	TBC1D30	0.89848	0.298878		0.63422	0.453962		3.65519	2.99078e-06
ENSCAFG00000000364	WIF1	-3.61585	0.000299627		-3.69728	0.00138703		-1.52566	0.204968
ENSCAFG00000000365	MRNIP	0.729261	0.122137		0.853187	0.0373586		0.312237	0.750392
ENSCAFG00000000366	SASH1	-0.421698	0.241572		-0.38365	0.29107		-0.187632	0.78757
ENSCAFG00000000367	ENPP3	5.79793	8.68734e-06		6.05932	1.41023e-06		2.33067	0.0199352
ENSCAFG00000000370	TMBIM4	0.485087	0.246505		0.358702	0.375864		1.25319	0.0172403
ENSCAFG00000000372	UST	-1.28519	0.00916837		-1.15415	0.0297847		-1.62995	0.00145816
ENSCAFG00000000373	TAB2	-0.49934	0.0241631		-0.476543	0.0596781		-0.79006	0.0405223
ENSCAFG00000000374	IRAK3	0.173347	0.832817		0.00585049	0.9944		0.61049	0.627762
ENSCAFG00000000375	ZC3H12D	-0.275056	0.731964		-0.380956	0.624181		0.0456371	0.972918
ENSCAFG00000000376	ENSCAFG00000000376	0.496154	0.309557		0.376424	0.473137		0.89737	0.186996
ENSCAFG00000000377	ATP5MG	-0.0671137	0.928944		-0.128551	0.861736		0.22379	0.831358
ENSCAFG00000000378	HELB	0.0988907	0.895537		-0.17522	0.761974		0.71859	0.403642
ENSCAFG00000000379	PPIL4	-0.0850439	0.764296		-0.0235455	0.939629		-0.113141	0.823878
ENSCAFG00000000380	MED23	-0.0216447	0.958482		0.0726361	0.854253		-0.243786	0.589179
ENSCAFG00000000381	TBC1D9B	-0.371375	0.172411		-0.221895	0.307557		-0.980082	0.00170812
ENSCAFG00000000382	ENSCAFG00000000382	1.75685	0.406166		2.11374	0.246947		-0.417483	NA
ENSCAFG00000000384	GRIP1	1.9486	3.3813e-06		2.05457	3.61777e-06		1.69123	0.00675909
ENSCAFG00000000385	KATNA1	-0.604699	0.0664418		-0.392744	0.0941863		-1.55985	4.81194e-06
ENSCAFG00000000386	ARG1	-1.73882	1.70452e-05		-1.94148	4.56882e-07		-1.63632	0.0143654
ENSCAFG00000000387	LATS1	-0.67149	0.00510203		-0.547777	5.76262e-05		-1.19116	0.010524
ENSCAFG00000000388	TRIM39	-0.680545	0.000364146		-0.73402	0.000672391		-0.503268	0.26419
ENSCAFG00000000389	ENSCAFG00000000389	-0.0420066	0.973196		0.0414915	0.974598		-0.25321	NA
ENSCAFG00000000390	NUP43	0.524105	0.209759		0.691083	0.00346272		-0.115659	0.891554
ENSCAFG00000000391	RASGEF1C	-4.01968	0.000918564		-4.07348	0.000722479		-4.3909	0.0130086
ENSCAFG00000000393	PCMT1	-0.733804	0.0321607		-0.525386	0.0643833		-1.67721	1.67387e-07
ENSCAFG00000000394	RPP21	0.129235	0.80368		0.130292	0.809636		0.179619	0.838316
ENSCAFG00000000395	MAPK9	-0.605542	0.0463868		-0.431839	0.0577034		-1.37882	0.000712516
ENSCAFG00000000396	GNL1	-0.716336	0.000347705		-0.725619	0.00105108		-0.776558	0.135459
ENSCAFG00000000397	CAND1	0.0531864	0.890339		0.122693	0.732818		-0.280588	0.644545
ENSCAFG00000000398	LRP11	-0.704593	0.281417		-0.440843	0.349959		-1.9304	0.0594688
ENSCAFG00000000399	RAET1G	3.28533	NA		3.43931	NA		2.56095	0.0399498
ENSCAFG00000000400	ENSCAFG00000000400	0.580925	NA		0.160456	NA		2.14661	NA
ENSCAFG00000000402	PPP1R14C	-0.115393	NA		0.00795213	NA		-1.21033	NA
ENSCAFG00000000405	PLEKHG1	0.105318	0.931035		0.156268	0.900608		0.540635	0.636659
ENSCAFG00000000406	PPP1R10	0.354356	0.217969		0.279977	0.353338		0.558221	0.365945
ENSCAFG00000000407	DYRK2	-0.936511	0.00848001		-0.830666	0.0279316		-1.52947	0.000983278
ENSCAFG00000000408	IFNG	1.56378	0.592997		-0.188368	NA		4.36831	NA
ENSCAFG00000000409	IL26	-0.53598	NA		-0.427818	NA		-1.13882	NA
ENSCAFG00000000410	IL22	0.599546	NA		0.720724	NA		NA	NA
ENSCAFG00000000411	MRPS18B	0.2231	0.378244		0.262242	0.225498		0.156085	0.796858
ENSCAFG00000000412	MDM1	0.266785	0.426676		0.260298	0.457426		0.201392	0.763721
ENSCAFG00000000413	MTHFD1L	-0.181436	0.84147		0.331906	0.603223		-2.6216	7.12819e-07
ENSCAFG00000000414	ATAT1	0.431076	0.407903		0.376802	0.500807		0.503847	0.428852
ENSCAFG00000000415	RAP1B	-1.16647	0.00016401		-1.11557	0.00057245		-1.60906	0.000924425
ENSCAFG00000000416	C6orf136	-0.161876	0.679691		-0.238004	0.525737		0.0124965	0.987598
ENSCAFG00000000417	NUP107	0.348209	0.365543		0.565593	0.0442674		-0.644823	0.0689183
ENSCAFG00000000418	MDM2	1.06515	0.0335353		1.19521	0.024849		0.679237	0.117918
ENSCAFG00000000419	AKAP12	-1.38665	0.0371849		-0.988844	0.050116		-3.31157	1.27152e-05
ENSCAFG00000000420	CPM	1.10059	0.184668		0.975119	0.291951		2.03851	0.0273463
ENSCAFG00000000421	ENSCAFG00000000421	-0.194436	0.890557		-0.00663558	0.996782		-1.35329	NA
ENSCAFG00000000422	ZBTB2	-0.453002	0.0422726		-0.422218	0.0339626		-0.588738	0.228344
ENSCAFG00000000423	RMND1	-0.241708	0.341013		-0.25061	0.314695		-0.214267	0.721182
ENSCAFG00000000424	CPSF6	0.205703	0.414508		0.330296	0.0573713		-0.31805	0.457082
ENSCAFG00000000425	ARMT1	-0.721992	0.00324291		-0.603231	0.0104984		-1.24405	0.00608755
ENSCAFG00000000426	LYZ	-0.748768	0.379215		-0.887858	0.297363		-0.205027	0.911163
ENSCAFG00000000427	DHX16	-0.499103	0.116987		-0.503518	0.136755		-0.54509	0.272418
ENSCAFG00000000428	YEATS4	0.0623325	0.804303		0.035668	0.896664		0.0752393	0.886441
ENSCAFG00000000429	CCDC170	1.13252	0.253347		1.41825	0.0979058		-0.785877	0.411007
ENSCAFG00000000430	ESR1	1.67821	0.0556506		1.92893	0.0127664		0.466169	0.743139
ENSCAFG00000000431	FRS2	-0.079569	0.919451		-0.0367448	0.960421		-0.181722	0.874749
ENSCAFG00000000432	CCT2	0.712046	0.0348834		0.843445	0.0160247		0.0390882	0.954102
ENSCAFG00000000433	GFPT2	-4.69682	1.37377e-07		-4.62446	1.05259e-06		-5.3225	8.7155e-05
ENSCAFG00000000434	LRRC10	0.580931	NA		0.412574	NA		1.21415	NA
ENSCAFG00000000436	RAB3IP	1.62578	7.37472e-07		1.54734	8.59693e-09		1.96181	0.00357333
ENSCAFG00000000437	PPP1R18	0.101524	0.827818		0.290397	0.305296		-0.665491	0.166239
ENSCAFG00000000439	MYRFL	0.775116	0.529028		0.517057	0.713519		3.7268	0.000281955
ENSCAFG00000000441	CNOT2	0.013233	0.941819		0.0439104	0.800998		-0.108288	0.776622
ENSCAFG00000000442	MDC1	-0.601172	0.0508753		-0.486242	0.126868		-1.13207	0.00306742
ENSCAFG00000000443	TUBB	0.148005	0.774081		0.384604	0.272511		-0.926633	0.132028
ENSCAFG00000000444	FLOT1	-0.365973	0.206859		-0.224216	0.288193		-0.93747	0.0317788
ENSCAFG00000000445	SYNE1	-2.86542	4.29741e-05		-2.66323	0.000441977		-3.75587	1.69483e-10
ENSCAFG00000000446	PTPRB	-1.31122	0.13735		-1.03094	0.215635		-2.73373	0.0542503
ENSCAFG00000000447	IER3	-1.45738	0.0610782		-1.27694	NA		-2.33849	0.0472668
ENSCAFG00000000448	DDR1	1.10631	0.0333154		1.16817	0.0422383		1.7466	0.000184494
ENSCAFG00000000450	TSPAN8	1.84223	0.121175		2.10665	0.0122566		-1.44501	NA
ENSCAFG00000000451	LGR5	4.6317	0.0333086		5.42402	0.0041285		-2.77152	NA
ENSCAFG00000000453	ZFC3H1	-0.524347	0.354726		-0.58575	0.339145		-0.753716	0.170447
ENSCAFG00000000454	VARS2	0.468266	0.291208		0.397285	0.273476		0.461337	0.605791
ENSCAFG00000000456	THAP2	-0.53708	0.0689922		-0.553138	0.088605		-0.619685	0.363256
ENSCAFG00000000457	TMEM19	0.286122	0.351416		0.288081	0.384784		0.635773	0.178285
ENSCAFG00000000458	RAB21	0.0129174	0.980997		0.0898095	0.862417		-0.506988	0.374029
ENSCAFG00000000459	TBC1D15	-0.15155	0.617132		-0.0502065	0.869361		-0.500464	0.201144
ENSCAFG00000000460	LAPTM4B	0.628268	0.589025		0.533648	0.671044		0.186995	0.884672
ENSCAFG00000000462	TPH2	-0.297637	NA		-0.300444	NA		-1.04954	NA
ENSCAFG00000000463	ERICH5	-1.15065	0.151077		-1.34531	0.0245225		-0.822812	0.653211
ENSCAFG00000000464	CNOT6	0.575878	0.049694		0.689631	0.0093735		0.173802	0.795886
ENSCAFG00000000465	ENSCAFG00000000465	-0.0372876	0.973356		-0.332345	0.747845		0.418292	0.760073
ENSCAFG00000000469	POP1	0.500041	0.129347		0.555253	0.092595		0.270763	0.701651
ENSCAFG00000000470	DPCR1	1.96	0.348037		2.19978	0.277057		0.825907	NA
ENSCAFG00000000471	MUC22	0.245853	NA		NA	NA		1.34972	NA
ENSCAFG00000000472	C6orf15	4.7296	0.00584419		4.71035	0.00310144		5.09468	0.243575
ENSCAFG00000000473	TRHDE	0.245853	NA		NA	NA		1.37493	NA
ENSCAFG00000000474	CDSN	6.73923	5.13689e-05		7.00497	1.33967e-06		5.33475	NA
ENSCAFG00000000475	PSORS1C2	3.58467	0.000438464		3.4879	0.000952014		3.16676	0.0209122
ENSCAFG00000000478	CCHCR1	-0.180932	0.731799		-0.195178	0.725461		-0.308866	0.653698
ENSCAFG00000000479	KCNC2	-1.9324	NA		-2.06405	NA		-2.20361	NA
ENSCAFG00000000480	NIPAL2	2.30741	8.46751e-05		2.3495	0.000413598		3.10287	0.000799974
ENSCAFG00000000481	CAPS2	-0.195208	0.934606		-3.32646	0.00797417		1.95144	0.184739
ENSCAFG00000000482	FLT4	-0.519925	0.471935		-0.407689	0.569265		-0.998547	0.318682
ENSCAFG00000000483	TCF19	0.684713	0.179845		0.941026	0.00412352		-0.611637	0.373926
ENSCAFG00000000484	STK3	0.0586137	0.886881		0.125083	0.698576		-0.267746	0.684919
ENSCAFG00000000485	POU5F1	-0.185007	NA		-0.192001	NA		-0.177058	NA
ENSCAFG00000000487	DLA88	0.0309941	0.973808		0.116866	0.897706		0.466994	0.695901
ENSCAFG00000000488	KCNS2	-0.53598	NA		-0.679935	NA		-0.417483	NA
ENSCAFG00000000489	ENSCAFG00000000489	-0.612667	0.673829		-2.31741	0.044516		0.348847	0.820339
ENSCAFG00000000491	LOC100687713	1.39148	0.0225479		1.4962	0.0180604		0.986101	0.413145
ENSCAFG00000000492	DLA-A	0.699027	0.425747		0.924375	0.2814		-0.317748	0.80772
ENSCAFG00000000493	OSR2	2.78686	0.00083941		3.0673	4.39143e-06		0.760505	0.529409
ENSCAFG00000000496	ENSCAFG00000000496	0.193367	0.673454		0.348221	0.392413		-0.650702	0.349486
ENSCAFG00000000497	LOC100684769	0.0584661	0.973356		0.00583092	0.997518		3.88416	0.000526778
ENSCAFG00000000498	9930111J21Rik1	0.1472	0.934862		0.0459725	0.981832		4.65534	7.70925e-05
ENSCAFG00000000500	DLA-64	0.229434	0.825803		0.226055	0.842636		1.66042	0.0556243
ENSCAFG00000000502	IFGGC1	0.351606	0.836294		0.244665	0.893154		4.52283	0.000752153
ENSCAFG00000000506	MCCD1	-0.318072	0.657237		-0.564442	0.328292		0.116719	0.930714
ENSCAFG00000000507	VPS13B	0.392867	0.50641		0.354758	0.498016		0.512089	0.591163
ENSCAFG00000000509	DDX39B	0.0980893	0.803373		0.144395	0.694758		-0.0984407	0.884672
ENSCAFG00000000510	PRR16	-3.23204	1.49811e-14		-3.28359	3.03351e-18		-2.9236	0.000548864
ENSCAFG00000000512	SRFBP1	-0.488781	0.105156		-0.342625	0.242152		-1.14927	0.000987574
ENSCAFG00000000513	ENSCAFG00000000513	-0.278237	0.680067		-0.399662	0.557158		0.770129	0.481774
ENSCAFG00000000515	LTA	-1.68892	0.328651		-2.16015	NA		-0.0262191	NA
ENSCAFG00000000517	TNF	-4.04042	NA		-4.50988	NA		-4.28951	NA
ENSCAFG00000000519	LOC474655	-1.19973	NA		-1.21311	NA		-1.13883	NA
ENSCAFG00000000522	SNCAIP	-3.02561	5.33135e-06		-3.00392	2.69987e-06		-3.36267	0.00921322
ENSCAFG00000000523	ENSCAFG00000000523	-0.324082	0.685655		-0.113137	0.891169		-1.33463	0.323449
ENSCAFG00000000525	GLIPR1	-0.134101	0.807758		-0.201752	0.668691		-0.0791491	0.934612
ENSCAFG00000000528	KRR1	-0.344834	0.111016		-0.396946	0.0709157		-0.250307	0.580288
ENSCAFG00000000529	RGS22	-0.159476	0.830219		-0.103993	0.898307		-0.295726	0.774392
ENSCAFG00000000530	SNX2	-0.507792	0.0392553		-0.391075	0.109186		-1.00119	0.0061508
ENSCAFG00000000532	ENSCAFG00000000532	0.38001	0.569518		0.339729	0.646462		0.37974	0.708598
ENSCAFG00000000533	PRRC2A	-0.489685	0.0729138		-0.353706	0.12646		-1.06389	0.00339596
ENSCAFG00000000534	SNX24	-0.326258	0.557076		-0.311484	0.592508		-0.625719	0.511111
ENSCAFG00000000535	MYCT1	-1.09304	0.257743		-0.877473	0.351383		-2.078	0.0835
ENSCAFG00000000536	ENSCAFG00000000536	-1.28264	0.447881		-1.73509	NA		1.63475	NA
ENSCAFG00000000538	VIP	-9.37088	NA		-8.5152	NA		-24.3354	NA
ENSCAFG00000000540	ENSCAFG00000000540	-0.875886	0.0336595		-0.707235	0.0519888		-1.64278	0.0492834
ENSCAFG00000000543	CEP120	-1.172	3.15788e-05		-1.04128	7.35993e-05		-1.74676	2.03533e-06
ENSCAFG00000000544	FBXO43	2.07716	0.081211		2.16432	0.0935121		2.04489	0.348246
ENSCAFG00000000547	FBXO5	1.52733	0.00963123		1.77013	0.000446197		0.307995	0.801381
ENSCAFG00000000548	SPAG1	1.73918	0.00185716		1.46169	0.00607751		3.54988	5.61516e-13
ENSCAFG00000000549	MTRF1L	-0.0776484	0.847303		-0.115817	0.76683		0.135646	0.850328
ENSCAFG00000000550	RGS17	0.46389	0.61237		0.768773	0.360685		-1.02509	0.228451
ENSCAFG00000000554	RABL2A	-0.111144	0.846881		-0.453322	0.274193		0.359559	0.477229
ENSCAFG00000000555	RNF19A	1.52875	2.76986e-05		1.44945	8.24487e-05		1.99627	0.00054705
ENSCAFG00000000557	CSNK1G3	-0.232803	0.486466		-0.122831	0.734183		-0.606293	0.137102
ENSCAFG00000000561	MIOX	3.62408	3.19391e-08		3.14806	3.09782e-08		4.97609	1.25953e-08
ENSCAFG00000000562	CNKSR3	-4.80631	4.66672e-16		-4.49348	8.45002e-14		-6.08155	3.39687e-17
ENSCAFG00000000563	SNX31	1.09683	0.122298		0.65485	0.272606		3.41896	1.71541e-14
ENSCAFG00000000564	SCO2	0.52302	0.2021		0.317828	0.35982		0.887694	0.240837
ENSCAFG00000000565	ENSCAFG00000000565	-0.296794	0.626914		-0.0874353	0.879742		-1.21352	0.0810522
ENSCAFG00000000566	ARSA	0.259206	0.486972		0.103965	0.76811		1.06015	0.0203792
ENSCAFG00000000567	PABPC1	1.13615	0.00202956		1.14319	0.0020199		1.35056	0.0267101
ENSCAFG00000000568	MAPK8IP2	1.53042	0.064848		1.49093	0.0731832		1.72314	0.151872
ENSCAFG00000000569	ZNF608	-1.59647	0.0220941		-2.19264	2.79777e-08		0.243663	0.816014
ENSCAFG00000000570	SCAF8	-0.68574	0.0142441		-0.539245	0.000407333		-1.28966	0.0104483
ENSCAFG00000000572	LMF2	0.676713	0.0439188		0.508813	0.0477646		1.16322	0.0370546
ENSCAFG00000000575	BAG6	0.177284	0.446864		0.23032	0.214437		-0.0603651	0.917172
ENSCAFG00000000576	ENSCAFG00000000576	0.112685	0.858327		0.325713	0.383099		-0.887266	0.373729
ENSCAFG00000000577	TIAM2	-3.19071	1.60702e-18		-3.16152	2.80949e-14		-3.27994	1.92911e-11
ENSCAFG00000000578	LOC607841	0.0303667	0.981726		0.180877	0.882325		-0.897929	NA
ENSCAFG00000000579	CHKB	0.304772	0.568309		-0.0257168	0.955351		0.977515	0.189406
ENSCAFG00000000580	YWHAZ	0.48944	0.13959		0.568809	0.102209		0.125259	0.840222
ENSCAFG00000000581	TFB1M	-0.1101	0.765311		-0.0150344	0.96915		-0.549408	0.357875
ENSCAFG00000000582	GRAMD2B	0.146452	0.788163		0.301674	0.394132		-0.487669	0.582693
ENSCAFG00000000583	CLDN20	-1.15339	NA		-1.50364	NA		-0.5521	NA
ENSCAFG00000000584	ZNF706	0.406849	0.105155		0.439696	0.0938869		0.290202	0.581429
ENSCAFG00000000586	CPT1B	-0.123413	0.924625		-1.03377	0.255825		0.851698	0.420724
ENSCAFG00000000587	GRHL2	1.44212	0.0124991		1.31037	0.0348511		3.08194	0.000256545
ENSCAFG00000000588	ALDH7A1	-0.506112	0.160949		-0.461572	0.267724		-0.859328	0.122357
ENSCAFG00000000590	PHAX	0.0405723	0.934593		0.165876	0.67923		-0.587481	0.31564
ENSCAFG00000000593	LMNB1	0.909702	0.0568217		1.06837	0.0173906		0.368	0.750194
ENSCAFG00000000594	MARCH3	0.395587	0.548171		0.343728	0.642857		1.52878	0.0586051
ENSCAFG00000000595	ENSCAFG00000000595	0.176968	0.880142		0.0303809	0.980878		0.514599	0.782854
ENSCAFG00000000596	ENSCAFG00000000596	0.931811	NA		0.664691	NA		1.8244	NA
ENSCAFG00000000598	APOM	-0.628648	0.136972		-0.701686	0.135594		-0.461282	0.56971
ENSCAFG00000000600	ENSCAFG00000000600	-0.173184	0.67829		-0.136322	0.767391		0.0248931	0.976902
ENSCAFG00000000601	GPANK1	-0.00724749	0.985499		-0.0403696	0.92027		0.208844	0.778925
ENSCAFG00000000602	RRM2B	-0.0303158	0.942946		-0.162763	0.635833		0.242306	0.670745
ENSCAFG00000000603	NCAPH2	0.418527	0.126011		0.368229	0.192569		0.477894	0.370349
ENSCAFG00000000604	CSNK2B	-0.0768946	0.829873		-0.0141059	0.971984		-0.268702	0.616688
ENSCAFG00000000606	LY6G5C	-0.620692	0.683933		-1.80338	0.204205		0.866452	0.512487
ENSCAFG00000000607	ABHD16A	0.000362897	0.999184		-0.170018	0.520066		0.403246	0.355041
ENSCAFG00000000608	ARID1B	-0.446556	0.243185		-0.335521	0.195407		-0.88376	0.20666
ENSCAFG00000000609	ADM2	4.00855	5.45652e-09		3.72742	5.14497e-08		5.1344	1.00727e-07
ENSCAFG00000000610	LY6G6F	1.19518	0.485988		0.226898	0.914886		2.28168	0.292021
ENSCAFG00000000611	MEGF10	-2.45347	0.00307635		-2.70545	0.00131411		-1.37975	0.339051
ENSCAFG00000000612	SBF1	1.11114	0.0176108		0.872451	0.0488569		1.28715	0.0554419
ENSCAFG00000000613	Ly6g6e	0.202904	0.929692		-0.282718	NA		1.2919	NA
ENSCAFG00000000614	LY6G6C	-2.84558	0.0316915		-3.15142	0.0421166		-1.03947	NA
ENSCAFG00000000615	MPIG6B	-1.29752	0.0128884		-1.18988	0.0391202		-1.59737	0.102748
ENSCAFG00000000616	TMEM242	-0.173724	0.516624		-0.155938	0.52563		-0.190037	0.782758
ENSCAFG00000000617	DDAH2	-1.80581	0.000180185		-1.69117	0.000831019		-2.23894	0.00119782
ENSCAFG00000000618	ZDHHC14	-1.3087	0.0848276		-1.02136	0.120355		-2.70817	0.00999866
ENSCAFG00000000619	UBR5	0.364991	0.387348		0.253177	0.50666		0.543282	0.435773
ENSCAFG00000000620	PPP6R2	0.0689276	0.886188		-0.149885	0.647873		0.262257	0.711529
ENSCAFG00000000621	CLIC1	0.652605	0.135614		0.80762	0.0236248		0.209547	0.812041
ENSCAFG00000000622	PRRC1	0.646594	0.154728		0.84428	0.036894		-0.219611	0.818341
ENSCAFG00000000624	ENSCAFG00000000624	0.559306	NA		0.329855	NA		1.24595	NA
ENSCAFG00000000626	MSH5	0.222988	0.731404		0.156478	0.834737		0.633823	0.354169
ENSCAFG00000000627	SNX9	0.0161794	0.975836		0.264836	0.357401		-1.12724	0.00557673
ENSCAFG00000000628	SAPCD1	-0.399264	0.686064		-0.557333	0.569966		0.732856	0.700571
ENSCAFG00000000629	DENND6B	0.197675	0.793452		-0.325307	0.484957		1.02955	0.206161
ENSCAFG00000000630	VWA7	-0.249045	0.76457		-0.659331	0.28454		1.59297	0.00559967
ENSCAFG00000000632	ENSCAFG00000000632	0.266648	0.648476		0.169965	0.783159		0.361579	0.728137
ENSCAFG00000000634	ENSCAFG00000000634	-0.373541	NA		-0.399411	NA		-0.177058	NA
ENSCAFG00000000636	VARS	0.60828	0.0610722		0.627429	0.0650247		0.349408	0.64456
ENSCAFG00000000637	SLC12A2	-0.317833	0.729944		0.023116	0.982848		-1.90788	0.000222887
ENSCAFG00000000638	KLF10	-0.495293	0.277899		-0.424214	0.375496		-0.665957	0.442426
ENSCAFG00000000639	HSPA1L	-2.00443	1.89836e-06		-2.2175	3.47179e-07		-1.65116	0.0282101
ENSCAFG00000000640	ENSCAFG00000000640	0.850888	0.333531		1.11251	0.120254		-0.477691	0.711179
ENSCAFG00000000641	HSP70	2.27592	0.00203463		2.51154	7.54984e-05		1.18945	0.289851
ENSCAFG00000000642	NEU1	-0.430672	0.0591486		-0.441425	0.07296		-0.187021	0.736727
ENSCAFG00000000643	AZIN1	0.141647	0.795077		0.233777	0.659612		-0.377799	0.653507
ENSCAFG00000000644	SYNJ2	0.0456506	0.955426		0.241705	0.622286		-0.767954	0.48534
ENSCAFG00000000646	ENSCAFG00000000646	0.30038	0.633414		0.204364	0.751884		0.661133	0.547339
ENSCAFG00000000647	SERAC1	0.43393	0.107602		0.424316	0.0873037		0.423002	0.460026
ENSCAFG00000000649	ATP6V1C1	0.503757	0.0186075		0.559049	0.0162008		0.233867	0.606323
ENSCAFG00000000652	TULP4	0.0522468	0.910833		0.182923	0.529528		-0.429323	0.553934
ENSCAFG00000000653	ENSCAFG00000000653	-0.235448	0.79058		-0.224053	0.812377		-0.548513	0.702449
ENSCAFG00000000654	FZD6	1.59647	0.00346591		1.67657	0.000577046		1.7262	0.0730834
ENSCAFG00000000655	TMEM181	0.78965	0.0219295		0.877053	0.000747735		0.539504	0.477813
ENSCAFG00000000656	CTHRC1	-2.90137	NA		-2.96221	NA		-0.944694	NA
ENSCAFG00000000657	DYNLT1	0.555133	0.173498		0.630264	0.137421		0.558052	0.2974
ENSCAFG00000000658	SLC44A4	1.83116	0.00336586		1.79724	0.012654		3.29605	0.000384961
ENSCAFG00000000659	SYTL3	-0.256716	0.795653		-0.334426	0.742048		1.60799	0.120015
ENSCAFG00000000661	EZR	0.368577	0.483777		0.564808	0.175362		-0.450029	0.461567
ENSCAFG00000000662	ENSCAFG00000000662	0.81147	0.360377		0.802518	0.418721		0.864782	0.446515
ENSCAFG00000000663	DCAF13	1.12056	6.07522e-06		1.19318	1.07934e-06		0.916277	0.0272957
ENSCAFG00000000664	RSPH3	-0.756372	0.0301911		-0.797796	0.0243194		-0.688377	0.389551
ENSCAFG00000000665	TAGAP	-0.437096	0.571123		-0.7176	0.308721		0.64918	0.63512
ENSCAFG00000000667	FNDC1	-2.14601	0.0777567		-1.75777	0.166533		-3.58052	0.00320077
ENSCAFG00000000669	EHMT2	-0.00258113	0.995116		0.0930533	0.731455		-0.330741	0.597209
ENSCAFG00000000670	RIMS2	2.19018	0.106728		2.48863	0.0516944		-0.674639	0.58351
ENSCAFG00000000671	SOD2	-0.523166	0.195858		-0.360399	0.323533		-1.26283	0.0318505
ENSCAFG00000000673	PLXNB2	1.28538	2.93013e-05		1.14562	5.03987e-06		1.95431	8.84542e-05
ENSCAFG00000000674	ZBTB12	0.0124225	0.985499		0.165598	0.75916		-0.43564	0.536273
ENSCAFG00000000675	DCSTAMP	2.5927	0.0876558		2.55357	0.107924		2.20177	NA
ENSCAFG00000000676	DPYS	-0.0823291	0.964475		0.192475	0.909236		-1.89921	NA
ENSCAFG00000000677	LRP12	-0.587316	0.301578		-0.485323	0.375118		-1.03832	0.173198
ENSCAFG00000000678	ZFPM2	-1.25622	0.149058		-0.781315	0.323891		-3.71345	5.69782e-08
ENSCAFG00000000679	SKIV2L	0.0632077	0.831571		0.130314	0.626985		-0.236858	0.671499
ENSCAFG00000000680	OXR1	-0.511088	0.00530838		-0.510978	0.00153081		0.559857	0.605781
ENSCAFG00000000681	FBN2	-0.823552	0.629814		-3.14391	0.00770301		-0.360617	0.87425
ENSCAFG00000000682	ABRA	-2.73979	0.0172521		-3.26332	0.00313604		-2.49877	0.161629
ENSCAFG00000000683	ENSCAFG00000000683	0.934908	0.041942		0.899401	0.052573		1.01673	0.196071
ENSCAFG00000000685	MAPK12	2.46001	0.0779177		1.48824	0.287751		7.98351	NA
ENSCAFG00000000686	CFB	-0.469778	0.408968		-0.448016	0.486464		-0.627638	0.554445
ENSCAFG00000000687	ENSCAFG00000000687	0.320327	NA		0.664248	NA		-1.13882	NA
ENSCAFG00000000688	HDAC10	0.978021	0.174634		0.228207	0.671361		2.01354	0.0162005
ENSCAFG00000000689	TUBGCP6	0.283573	0.661612		-0.126617	0.818859		0.914525	0.200586
ENSCAFG00000000690	NELFE	0.0479074	0.865961		0.122838	0.61902		-0.119422	0.797102
ENSCAFG00000000691	IGF2R	-0.0808661	0.874658		0.062928	0.882223		-0.719088	0.292363
ENSCAFG00000000692	SELENOO	0.55353	0.310247		0.0985552	0.790177		1.61245	0.0115321
ENSCAFG00000000693	ANGPT1	-1.26876	0.0831919		-1.41921	0.0466321		-0.660648	0.671838
ENSCAFG00000000694	DXO	-0.0265022	0.942775		-0.0261986	0.940009		0.0404651	0.957542
ENSCAFG00000000696	RSPO2	-1.04653	0.496095		-1.26344	0.436245		2.0637	0.302724
ENSCAFG00000000697	LOC607055	1.22977	0.351144		0.863158	0.472331		4.91085	0.00277237
ENSCAFG00000000698	TRABD	0.966303	0.000276101		0.823484	5.81187e-07		1.29689	0.021046
ENSCAFG00000000699	PANX2	1.84117	0.00674264		1.56941	0.00176125		2.12786	0.0727724
ENSCAFG00000000700	MOV10L1	0.422003	0.852608		-0.733154	0.699209		2.92486	0.245759
ENSCAFG00000000701	C4A	-1.36826	0.0531351		-1.66408	0.0077507		0.5506	0.622169
ENSCAFG00000000702	EIF3E	0.629017	0.102698		0.73349	0.0474186		0.253747	0.733375
ENSCAFG00000000703	MLC1	0.0614762	0.983152		-1.17926	NA		2.2713	NA
ENSCAFG00000000704	TTLL8	-1.44243	0.218916		-2.20637	0.0286686		-0.562749	0.767511
ENSCAFG00000000706	IL17REL	2.22754	0.221281		1.55423	NA		5.38443	0.012956
ENSCAFG00000000709	CRELD2	0.97996	0.0973744		0.858435	0.118384		1.09404	0.327581
ENSCAFG00000000710	SLC27A6	-1.45108	0.128467		-1.86297	0.0248248		0.28881	0.857196
ENSCAFG00000000711	ALG12	0.506752	0.160012		0.335558	0.325524		0.999847	0.0612347
ENSCAFG00000000712	CYP21A2	-0.98311	0.119999		-1.09127	0.075461		-0.638314	0.548606
ENSCAFG00000000713	EMC2	0.401839	0.351689		0.330839	0.490455		0.470275	0.495758
ENSCAFG00000000714	ZBED4	0.939166	0.00604726		1.01736	0.00341644		0.73216	0.329885
ENSCAFG00000000716	TMEM74	1.62419	0.0749786		1.78674	0.0436903		0.923257	0.514848
ENSCAFG00000000717	TRHR	1.92107	NA		0.468606	NA		3.62589	NA
ENSCAFG00000000718	BRD1	0.266414	0.316707		0.296651	0.222813		0.0800062	0.898599
ENSCAFG00000000719	NUDCD1	1.07113	0.00045619		1.22219	9.00144e-06		0.409442	0.391819
ENSCAFG00000000720	ACAT2	1.75133	0.000173807		1.93607	2.55501e-06		1.07814	0.126937
ENSCAFG00000000721	ISOC1	0.273698	0.461112		0.291332	0.391899		0.421281	0.624054
ENSCAFG00000000722	ADAMTS19	-2.4821	0.0436763		-2.24427	0.108459		-3.58542	0.000440355
ENSCAFG00000000723	KIAA1024L	-1.15454	NA		-1.03546	NA		-2.08738	NA
ENSCAFG00000000731	FAM19A5	-0.720402	0.695715		-0.416217	0.83751		-2.46338	0.00744539
ENSCAFG00000000732	TCP1	0.0871868	0.859098		0.304758	0.352792		-0.892332	0.016735
ENSCAFG00000000733	ENSCAFG00000000733	-0.523973	NA		-0.052182	NA		-2.687	NA
ENSCAFG00000000734	ENSCAFG00000000734	0.934618	NA		1.20355	NA		NA	NA
ENSCAFG00000000736	LYRM7	-0.0957531	0.8525		-0.17145	0.732141		0.0109036	0.99071
ENSCAFG00000000737	CDC42SE2	-0.109471	0.913289		-0.00307784	0.997717		-0.185697	0.863444
ENSCAFG00000000738	EBAG9	0.941552	0.000155784		0.900804	0.000747735		1.29005	0.00168073
ENSCAFG00000000740	PNLDC1	-0.516119	0.684039		-1.1973	0.311032		0.658286	0.651736
ENSCAFG00000000741	SYBU	0.131167	0.920778		0.452819	0.631993		-2.37976	0.0031701
ENSCAFG00000000744	KCNV1	-2.24347	NA		-2.64802	NA		-0.988764	NA
ENSCAFG00000000745	TBC1D22A	0.469521	0.0962386		0.44942	0.137161		0.666891	0.150905
ENSCAFG00000000749	ENSCAFG00000000749	-0.18596	0.915188		-0.0561326	0.978677		-0.593058	NA
ENSCAFG00000000750	SLC22A1	-3.60008	0.0602323		-4.70064	0.000329094		3.1617	0.00726326
ENSCAFG00000000751	TNXB	-1.21295	0.0718603		-1.01144	0.166426		-2.1219	0.00588969
ENSCAFG00000000752	CERK	-2.01558	0.000509883		-1.89114	0.00328126		-2.74067	2.4222e-06
ENSCAFG00000000755	FNIP1	-0.760142	0.108298		-0.751448	0.106721		-0.873058	0.220365
ENSCAFG00000000756	GRAMD4	0.0191093	0.974886		0.107561	0.842605		-0.244989	0.733285
ENSCAFG00000000757	SLC22A2	-4.59093	0.000664612		-4.99316	0.000726632		-3.99171	0.032871
ENSCAFG00000000758	PLG	-1.84172	NA		-1.75726	NA		-2.68699	NA
ENSCAFG00000000760	MAP3K4	-0.402985	0.178229		-0.236549	0.156355		-1.11688	0.0140975
ENSCAFG00000000761	ATF6B	0.462999	0.116012		0.537621	0.0262194		0.333125	0.592322
ENSCAFG00000000764	PRRT1	-0.157645	0.90068		-1.06884	0.171341		1.69703	0.010524
ENSCAFG00000000765	AGPAT4	-0.26071	0.815911		0.119166	0.917333		-2.25871	0.000131598
ENSCAFG00000000766	PPT2	0.596535	0.253063		0.186754	0.644155		1.79971	1.34891e-06
ENSCAFG00000000767	CELSR1	-0.716562	0.563207		-0.46165	0.711779		-2.27113	0.0177159
ENSCAFG00000000768	EGFL8	0.358038	0.649		-0.0758132	0.93084		0.896156	0.224804
ENSCAFG00000000769	ENSCAFG00000000769	-1.65653	0.0293868		-1.74578	0.0148459		-1.95843	0.109912
ENSCAFG00000000770	PACRG	-3.65297	0.000909644		-3.93866	0.0018505		-3.18021	0.0685756
ENSCAFG00000000771	AGPAT1	0.495336	0.314261		0.369648	0.431762		1.43292	0.0344451
ENSCAFG00000000772	QKI	-1.06025	0.0104763		-0.991008	0.0118207		-1.58078	0.0146435
ENSCAFG00000000774	RNF5	-0.591882	0.0617008		-0.663791	0.0116035		-0.257837	0.742045
ENSCAFG00000000776	Rbm31y	-0.463446	0.772684		-0.378266	0.819953		-0.983378	NA
ENSCAFG00000000777	AGER	0.513545	0.515081		0.30244	0.732346		0.890049	0.322102
ENSCAFG00000000779	TRMU	0.500535	0.37699		0.105961	0.831499		1.04679	0.175946
ENSCAFG00000000781	C6orf118	0.873803	NA		0.664691	NA		1.85511	NA
ENSCAFG00000000782	GTSE1	1.84571	0.0159995		2.01853	0.0120404		1.11556	0.534156
ENSCAFG00000000783	PBX2	-0.343557	0.157155		-0.335996	0.207859		-0.369731	0.423345
ENSCAFG00000000784	TTC38	0.343091	0.568984		0.145533	0.820255		1.38273	0.0180111
ENSCAFG00000000785	PKDREJ	-1.163	0.262559		-1.3777	0.226327		-0.686381	0.33466
ENSCAFG00000000786	CSMD3	2.44263	NA		2.46733	NA		4.15008	0.0665151
ENSCAFG00000000787	CDPF1	0.339502	0.634866		-0.162403	0.756181		1.42932	0.0842334
ENSCAFG00000000788	PPARA	-1.11277	0.183387		-1.14577	0.0629806		-1.39063	0.390828
ENSCAFG00000000789	WNT7B	2.33117	0.00330831		2.14142	0.0121631		4.32054	0.000167914
ENSCAFG00000000790	GPSM3	0.241916	0.787801		-0.0424397	0.965689		2.23008	0.0240175
ENSCAFG00000000791	NOTCH4	-0.374244	0.646928		-0.29906	0.676408		-0.715771	0.627248
ENSCAFG00000000792	Btnl4	-2.16648	0.0776402		-2.5542	0.0693524		-0.221464	0.913222
ENSCAFG00000000795	PDE10A	2.42471	0.0036347		2.41218	0.00235424		2.58269	0.0371121
ENSCAFG00000000797	BTNL2	2.6509	0.102096		2.08026	0.28926		3.71998	0.0704925
ENSCAFG00000000798	ENSCAFG00000000798	2.10948	0.000400092		2.31457	2.17711e-06		0.977579	0.154069
ENSCAFG00000000799	ACSL6	-1.26502	0.155763		-1.29107	0.186534		-1.67217	0.100329
ENSCAFG00000000801	LOC100856021	2.40915	0.318587		1.16846	NA		2.64972	NA
ENSCAFG00000000803	DLA-DRA	0.67876	0.48717		0.725738	0.481389		1.73274	0.161889
ENSCAFG00000000804	FBLN1	-1.24856	0.167994		-1.11076	0.179276		-1.52001	0.316878
ENSCAFG00000000806	DLA-DRB1	1.36894	0.127117		1.48009	0.11719		1.83924	0.0969179
ENSCAFG00000000808	ENSCAFG00000000808	0.246008	0.845024		0.252572	0.854753		-0.191161	0.923592
ENSCAFG00000000809	RIBC2	-1.49048	0.319503		-1.98129	0.127021		1.74721	0.403336
ENSCAFG00000000810	TRPS1	-0.740172	0.518037		-0.907489	0.451437		-0.657667	0.43902
ENSCAFG00000000811	SFT2D1	0.437459	0.202174		0.335789	0.369402		1.16293	0.000351969
ENSCAFG00000000812	DLA-DQA1	0.7908	0.425479		0.835569	0.403849		1.53905	0.317526
ENSCAFG00000000814	DLA-DQB1	1.41006	0.103688		1.48095	0.112555		2.19723	0.0618806
ENSCAFG00000000816	EIF3H	0.454092	0.285411		0.529925	0.240038		0.133914	0.858405
ENSCAFG00000000817	IL3	1.80317	NA		1.94434	NA		1.26655	NA
ENSCAFG00000000819	DLA-DOB	0.810647	0.571598		0.729663	0.623392		3.04887	NA
ENSCAFG00000000820	CSF2	-3.15834	NA		-2.52105	NA		-5.7825	NA
ENSCAFG00000000821	UTP23	0.757863	0.103257		0.595954	0.17768		1.81827	0.00232854
ENSCAFG00000000822	RAD21	0.577346	0.0439597		0.687789	0.00216079		0.247233	0.647517
ENSCAFG00000000823	TAP2	0.982674	0.0181511		0.906757	0.0338208		1.67965	0.00131702
ENSCAFG00000000824	P4HA2	-0.215627	0.763785		0.0723035	0.879831		-1.84067	0.00243028
ENSCAFG00000000825	SLC30A8	-2.01609	NA		-2.07253	NA		-1.13885	NA
ENSCAFG00000000826	MED30	0.198595	0.484556		0.149674	0.609533		0.49125	0.321097
ENSCAFG00000000827	SMC1B	2.20253	0.00917494		1.84647	0.0468067		2.93263	0.000269216
ENSCAFG00000000828	RPS6KA2	-3.49075	7.71581e-10		-3.54103	8.19129e-11		-3.96892	2.03103e-05
ENSCAFG00000000829	PSMB8	0.246396	0.791566		0.223113	0.831517		1.7241	0.0354085
ENSCAFG00000000830	PDLIM4	-3.63086	5.87828e-13		-3.68374	8.85282e-15		-3.95119	5.97653e-07
ENSCAFG00000000831	EXT1	0.000973062	0.998134		0.087145	0.844936		-0.255195	0.679065
ENSCAFG00000000832	TAP1	0.561974	0.361156		0.509902	0.451104		1.42255	0.0427745
ENSCAFG00000000833	SAMD12	0.635202	0.192012		0.566412	0.267996		1.01453	0.109447
ENSCAFG00000000834	TNFRSF11B	2.47751	0.0572085		3.02232	0.0116553		-1.6112	0.0493628
ENSCAFG00000000835	ENSCAFG00000000835	-0.866724	0.135572		-0.962324	0.0745973		-0.631229	0.620878
ENSCAFG00000000838	FAM118A	1.26988	4.24395e-05		1.24812	0.00021042		1.51002	0.00388642
ENSCAFG00000000839	MAL2	2.68173	6.87386e-05		2.77167	9.02735e-05		2.97605	0.00672664
ENSCAFG00000000840	SLC22A4	-2.94144	7.50958e-05		-3.08517	0.000204456		-3.20701	0.000881711
ENSCAFG00000000842	RNASET2	0.574701	0.115666		0.655548	0.0754096		0.476139	0.359073
ENSCAFG00000000843	UPK3A	2.67236	0.000222307		2.6033	0.00116058		5.29969	1.16961e-09
ENSCAFG00000000846	ENSCAFG00000000846	-0.000255671	NA		-0.192407	NA		0.544279	NA
ENSCAFG00000000847	FGFR1OP	0.560031	0.0365918		0.569979	0.0239659		0.661253	0.228224
ENSCAFG00000000848	DLA-DMA	0.698723	0.320849		0.678641	0.360905		1.95335	0.0197861
ENSCAFG00000000849	ENSCAFG00000000849	-0.960355	NA		-1.06652	NA		0.250772	NA
ENSCAFG00000000850	KIAA0930	1.20986	0.0156875		1.22821	0.0242714		0.854975	0.302991
ENSCAFG00000000851	IRF1	0.228894	0.798604		0.417518	0.630361		-0.514156	0.722734
ENSCAFG00000000853	GPR31	-0.449517	0.717471		-0.783711	0.437848		1.28332	0.563734
ENSCAFG00000000855	IL5	-1.22605	0.2893		-1.06969	0.392374		-2.04747	NA
ENSCAFG00000000856	NUP50	1.54447	7.80429e-08		1.45243	2.31513e-06		1.74931	0.000118998
ENSCAFG00000000857	ENSCAFG00000000857	1.56546	0.134646		1.6757	0.100677		1.1094	NA
ENSCAFG00000000858	UNC93A	4.53728	0.00275433		4.88803	0.000621105		1.35995	NA
ENSCAFG00000000860	AFDN	0.808367	0.0209416		0.940292	0.000144832		0.319256	0.677915
ENSCAFG00000000861	PHF21B	-2.45563	0.0161628		-3.36965	0.000353202		-1.55113	0.14747
ENSCAFG00000000863	KIF25	2.96463	0.182225		3.40979	0.142411		0.304773	NA
ENSCAFG00000000864	FRMD1	1.44696	0.122573		1.65146	0.070911		0.453082	0.797775
ENSCAFG00000000865	ENPP2	-0.924222	0.247601		-0.757603	0.330068		-1.47456	0.271982
ENSCAFG00000000866	DACT2	-5.89392	2.83016e-13		-6.25474	5.45976e-12		-5.25417	0.000119378
ENSCAFG00000000867	RAD50	-0.217348	0.495489		-0.0254222	0.91356		-1.06656	1.43233e-05
ENSCAFG00000000868	SMOC2	-4.32844	2.44176e-14		-4.23887	3.11549e-11		-3.14853	NA
ENSCAFG00000000869	PRR5	1.67441	1.97653e-05		1.54706	0.000109102		2.52476	0.000172708
ENSCAFG00000000870	RTL6	-0.872014	0.0615829		-0.90518	0.0567079		-1.20712	0.0520489
ENSCAFG00000000871	BRD2	-0.717241	1.37412e-06		-0.672445	1.15572e-05		-0.872973	0.00509739
ENSCAFG00000000873	SHISAL1	-3.46273	0.000122614		-3.06771	0.0005189		-4.9081	6.81614e-06
ENSCAFG00000000874	THBS2	-3.23163	1.20189e-05		-3.29362	4.8531e-06		-3.01511	NA
ENSCAFG00000000875	TAF2	-0.111122	0.782903		-0.140157	0.725056		-0.22988	0.683068
ENSCAFG00000000876	PARVG	-0.24644	0.73746		-0.747565	0.07134		1.08264	0.167021
ENSCAFG00000000877	ENSCAFG00000000877	-0.22351	NA		-0.0544168	NA		-1.27883	NA
ENSCAFG00000000878	IL13	-2.01045	NA		-1.82364	NA		-2.59635	NA
ENSCAFG00000000879	ENSCAFG00000000879	-1.11113	0.503621		-1.25806	NA		-0.580714	NA
ENSCAFG00000000880	IL4	-0.96905	NA		-0.742003	NA		-2.02946	NA
ENSCAFG00000000882	DSCC1	1.11105	0.0188767		1.35584	0.00112147		-0.0413411	0.962279
ENSCAFG00000000883	ENSCAFG00000000883	0.534684	0.450042		0.72567	0.242372		-0.512801	0.777173
ENSCAFG00000000884	WDR27	-3.4219	1.38126e-10		-3.53982	5.15722e-11		-3.53117	6.17396e-07
ENSCAFG00000000885	DEPTOR	-0.957737	0.114558		-1.2647	0.0126086		0.111153	0.913957
ENSCAFG00000000886	DSE	-1.80331	0.00420427		-1.62018	0.0173338		-2.57656	3.89843e-10
ENSCAFG00000000887	SAMM50	-0.527069	0.144096		-0.584211	0.107197		-0.719218	0.198327
ENSCAFG00000000889	CALHM5	-4.78971	1.56579e-22		-4.67022	4.8407e-27		-5.42427	3.10194e-10
ENSCAFG00000000891	CALHM4	-0.905728	0.482327		-0.79212	0.573563		-1.40874	NA
ENSCAFG00000000893	PNPLA3	0.601345	0.543943		-0.043485	0.970951		3.69544	0.00228243
ENSCAFG00000000894	Sult3a1	0.0999761	NA		0.0171797	NA		0.0303027	NA
ENSCAFG00000000895	PNPLA5	-1.64505	0.714887		-1.91013	NA		7.75952	0.0442132
ENSCAFG00000000896	DLA-DOA	-0.791714	0.396913		-1.09829	0.225385		1.02416	0.343613
ENSCAFG00000000897	RSPH4A	0.302757	0.793324		0.383894	0.735575		0.419072	0.837316
ENSCAFG00000000898	KIF3A	-0.0725965	0.900932		0.0857606	0.882044		-0.74167	0.0445551
ENSCAFG00000000899	SULT4A1	-2.49008	0.05117		-3.44891	0.00361005		1.28542	0.436651
ENSCAFG00000000900	DLA-DPB1	0.287269	0.833883		0.472559	0.717041		-0.320548	NA
ENSCAFG00000000901	ZUFSP	0.219046	0.52499		0.317171	0.276931		-0.00417064	0.99518
ENSCAFG00000000902	EFCAB6	-1.01748	0.443184		-1.71409	0.13858		0.842231	0.534929
ENSCAFG00000000903	COL11A2	2.56283	0.0408653		0.925436	0.447521		3.98005	0.00010413
ENSCAFG00000000904	MPPED1	-4.45242	1.11484e-06		-4.57045	1.13972e-05		-3.83296	0.00265786
ENSCAFG00000000905	KPNA5	-0.603123	0.0932697		-0.740982	0.00175745		-0.363938	0.645057
ENSCAFG00000000906	SEPT8	0.0706382	0.877637		0.0977484	0.814469		-0.0822668	0.914031
ENSCAFG00000000907	SCUBE1	-3.52807	0.000423364		-4.05334	3.75312e-06		-2.88042	0.0436998
ENSCAFG00000000908	FAM162B	-0.732871	NA		-0.683885	NA		-0.417503	NA
ENSCAFG00000000909	TTLL12	0.895984	0.0070709		1.06804	1.51454e-05		0.19393	0.782758
ENSCAFG00000000910	SOWAHA	2.30421	0.0868456		1.53894	0.243468		6.9009	1.34836e-08
ENSCAFG00000000912	RXRB	-0.810339	0.0019315		-0.906881	0.000149255		-0.612568	0.320576
ENSCAFG00000000913	TSPO	1.09665	0.0119321		1.04038	0.0130219		2.06417	0.00192892
ENSCAFG00000000914	SHROOM1	1.58246	0.0427744		1.07022	0.182496		2.72498	6.49381e-05
ENSCAFG00000000915	RFX6	-0.499858	NA		-0.789482	NA		1.37491	NA
ENSCAFG00000000916	GDF9	-0.45116	0.52893		-0.866316	0.118142		0.776582	0.36993
ENSCAFG00000000917	SLC39A7	-0.0385649	0.933022		-0.192062	0.579715		0.584329	0.37623
ENSCAFG00000000918	MCAT	0.478777	0.222531		0.372488	0.272524		0.69335	0.355738
ENSCAFG00000000919	UQCRQ	0.459171	0.432252		0.260362	0.667379		1.15367	0.120988
ENSCAFG00000000920	VGLL2	0.580925	NA		0.664691	NA		0.544292	NA
ENSCAFG00000000921	BIK	0.42017	0.743335		-0.192308	0.876849		0.853339	0.6284
ENSCAFG00000000922	LEAP2	2.28698	0.193207		0.0918986	0.958924		6.55955	9.42501e-07
ENSCAFG00000000923	ROS1	4.33798	0.000126556		4.4632	0.000180227		4.60164	0.000179828
ENSCAFG00000000925	DCBLD1	1.40922	0.00125524		1.37539	0.0027144		2.37004	0.000266255
ENSCAFG00000000926	TTLL1	-0.080907	0.867195		-0.223854	0.613184		0.142841	0.81945
ENSCAFG00000000927	HSD17B8	-0.1824	0.618947		-0.189119	0.635815		0.00841469	0.99246
ENSCAFG00000000928	GOPC	0.483516	0.311575		0.302641	0.455532		1.1248	0.108488
ENSCAFG00000000929	Nepn	-0.182287	NA		-0.119668	NA		-1.13882	NA
ENSCAFG00000000930	AFF4	-0.515579	0.45192		-0.514526	0.438316		-0.764638	0.440529
ENSCAFG00000000931	NUS1	0.496514	0.0720297		0.615724	0.00563432		0.0659292	0.926875
ENSCAFG00000000932	SLC35F1	-4.37756	4.11242e-07		-5.37065	2.0738e-15		-3.01736	0.00317327
ENSCAFG00000000933	RING1	-0.153407	0.667783		-0.314304	0.139014		0.301402	0.634929
ENSCAFG00000000934	COL14A1	-5.05456	5.49617e-13		-4.8428	3.69139e-12		-5.93823	9.04336e-07
ENSCAFG00000000935	CEP85L	-3.44327	3.24233e-10		-3.51783	4.013e-10		-3.80448	1.89609e-07
ENSCAFG00000000936	PACSIN2	-0.615963	0.104026		-0.484451	0.23843		-1.23253	0.0118741
ENSCAFG00000000938	MCM9	-0.0661327	0.86601		-0.0528976	0.890629		0.0253492	0.97129
ENSCAFG00000000939	ASF1A	-0.376402	0.320181		-0.251491	0.468796		-0.916418	0.140346
ENSCAFG00000000940	MRPL13	1.12138	0.00046885		1.13633	0.00101412		1.02455	0.0472164
ENSCAFG00000000941	VPS52	0.0320996	0.923802		-0.0800911	0.751884		0.325435	0.474639
ENSCAFG00000000942	FAM184A	-0.396345	0.589179		-0.869166	0.103847		0.800901	0.159271
ENSCAFG00000000943	ARFGAP3	-0.767668	0.00901609		-0.619051	0.0206532		-1.47385	0.000375285
ENSCAFG00000000945	MAN1A1	-0.759961	0.382852		-1.16402	0.112488		0.748062	0.446784
ENSCAFG00000000946	A4GALT	-0.641592	0.503918		-0.343286	0.711558		-1.94941	0.0784092
ENSCAFG00000000948	HSPA4	0.267373	0.450388		0.307889	0.408929		0.108549	0.892676
ENSCAFG00000000950	RPS18	0.256782	0.609646		0.421751	0.349664		-0.389604	0.44423
ENSCAFG00000000951	MTBP	0.427717	0.255664		0.39597	0.186385		0.455609	0.557645
ENSCAFG00000000952	B3GALT4	-0.275156	0.658227		-0.277076	0.65142		0.529103	0.602145
ENSCAFG00000000953	CYB5R3	-0.143604	0.806017		0.151873	0.713734		-1.54804	0.000291775
ENSCAFG00000000954	WDR46	0.417212	0.24325		0.485098	0.165428		0.219412	0.771378
ENSCAFG00000000955	TBC1D32	0.20417	0.696757		0.286732	0.468796		-0.187594	0.863444
ENSCAFG00000000956	PFDN6	0.208168	0.643316		0.240301	0.579715		0.26257	0.733959
ENSCAFG00000000957	SNTB1	-0.589819	0.646399		-1.67889	0.0741591		1.19275	0.104326
ENSCAFG00000000958	GJA1	1.086	0.464808		1.65812	0.189805		-3.12892	0.023898
ENSCAFG00000000959	POLDIP3	-0.0768515	0.85646		0.0941373	0.802008		-0.855181	0.0167281
ENSCAFG00000000961	ENSCAFG00000000961	1.2346	0.824266		-0.399801	NA		5.74002	0.0837722
ENSCAFG00000000963	RGL2	0.600509	0.191088		0.343008	0.30242		1.55851	0.0102996
ENSCAFG00000000965	RRP7A	0.163924	0.646274		0.140068	0.728238		0.0392146	0.950495
ENSCAFG00000000967	ZHX2	-0.933846	0.0400949		-1.14967	0.00544785		-0.431109	0.5094
ENSCAFG00000000968	FSTL4	-2.01632	0.0440348		-1.6642	0.120037		-3.40673	0.0190564
ENSCAFG00000000969	HSF2	-0.688705	0.0512771		-0.513878	0.0986715		-1.48601	0.00191627
ENSCAFG00000000970	SERHL2	-0.026679	0.948744		-0.0635742	0.879707		-0.186118	0.75329
ENSCAFG00000000972	TAPBP	1.06974	0.0404998		1.0603	0.0629734		2.19064	0.000211592
ENSCAFG00000000974	DERL1	0.999529	8.96955e-05		0.936263	0.00104569		1.50808	6.86064e-05
ENSCAFG00000000975	NFAM1	0.372685	0.688735		0.122419	0.900966		1.64862	0.297753
ENSCAFG00000000976	ENSCAFG00000000976	0.839204	NA		0.569097	NA		0.37811	NA
ENSCAFG00000000977	ZBTB22	-0.106622	0.775249		-0.157996	0.656755		0.384736	0.539426
ENSCAFG00000000978	TCF20	0.149094	0.608481		0.224732	0.31915		-0.180264	0.746606
ENSCAFG00000000981	DAXX	-0.261474	0.376575		-0.2254	0.421342		-0.165027	0.798352
ENSCAFG00000000982	NDUFA6	0.228219	0.653569		0.104701	0.820852		0.708328	0.421512
ENSCAFG00000000983	SMDT1	-0.459006	0.317445		-0.548679	0.183572		-0.0537593	0.956286
ENSCAFG00000000985	VDAC1	0.813432	0.00465002		0.923453	0.000367973		0.423056	0.448377
ENSCAFG00000000986	TBC1D31	0.449133	0.0403288		0.464308	0.0526735		0.451933	0.208245
ENSCAFG00000000987	KIFC1	1.19787	0.00677295		1.34304	0.00300235		0.681647	0.455796
ENSCAFG00000000988	NAGA	-0.127805	0.79058		-0.118203	0.79836		-0.318507	0.723113
ENSCAFG00000000989	SERINC1	-0.108984	0.824057		0.0327613	0.92063		-0.674926	0.386713
ENSCAFG00000000990	TCF7	0.918329	0.318503		1.10569	0.156636		0.224228	NA
ENSCAFG00000000991	WBP2NL	-0.922521	0.614051		-2.11425	0.142903		0.773663	0.754224
ENSCAFG00000000992	ATAD2	1.42134	0.0193278		1.59885	0.0142491		0.649951	0.608147
ENSCAFG00000000994	SKP1	-0.16771	0.641529		-0.0391395	0.914735		-0.68005	0.19224
ENSCAFG00000000995	SEPT3	-7.87208	3.11516e-14		-7.29483	2.95359e-13		-10.8442	6.74525e-11
ENSCAFG00000000996	FABP7	-0.16568	0.919697		-0.797382	0.618081		0.270559	0.895987
ENSCAFG00000000997	FAM83A	4.98047	0.00436218		5.51512	0.00104943		1.1352	NA
ENSCAFG00000000998	PHF1	-0.514107	0.331321		-0.917186	0.0145676		0.394041	0.48512
ENSCAFG00000001000	C13H8orf76	0.759501	0.036282		0.746685	0.073379		0.964586	0.0635343
ENSCAFG00000001001	ZHX1	-0.722127	0.164751		-0.61385	0.136537		-1.20848	0.181604
ENSCAFG00000001002	SMPDL3A	1.2988	0.122787		1.11084	0.240497		1.57764	0.196113
ENSCAFG00000001003	CENPM	1.35399	0.00731922		1.54726	0.00121553		0.466634	0.700696
ENSCAFG00000001004	WDYHV1	0.82271	0.0153369		0.945473	0.0040828		0.263389	0.639202
ENSCAFG00000001005	TNFRSF13C	1.02156	0.115511		1.11083	0.0810582		1.10421	0.311615
ENSCAFG00000001006	CLVS2	-1.6739	NA		-1.38857	NA		-2.91652	NA
ENSCAFG00000001007	FBXO32	-3.20592	0.000179489		-2.7245	0.00180525		-5.27131	1.07778e-06
ENSCAFG00000001008	CUTA	0.760501	0.166154		0.645856	0.151739		1.89021	0.0316399
ENSCAFG00000001010	PPP2CA	0.207768	0.512245		0.352247	0.121683		-0.374608	0.3841
ENSCAFG00000001011	ENSCAFG00000001011	-1.55595	NA		-1.64014	NA		-1.33018	NA
ENSCAFG00000001012	KLHL38	-5.36619	9.75672e-10		-5.168	2.29929e-09		-6.38099	8.60123e-07
ENSCAFG00000001013	SREBF2	1.82568	2.19154e-08		1.87967	8.25184e-12		1.76677	0.0162282
ENSCAFG00000001014	SYNGAP1	-1.63131	3.91561e-05		-1.85463	8.35232e-06		-1.44262	0.000437136
ENSCAFG00000001015	ANXA13	-1.88724	0.0521503		-2.0599	0.0639174		-1.36915	0.326634
ENSCAFG00000001016	TRDN	0.201884	0.898266		0.486084	0.754337		2.91044	NA
ENSCAFG00000001017	ENSCAFG00000001017	-0.127845	0.776042		-0.213234	0.586606		0.0751976	0.922763
ENSCAFG00000001018	CCDC134	0.321983	0.407453		0.221973	0.582306		0.696385	0.350156
ENSCAFG00000001019	UBE2B	-0.180365	0.669517		-0.0280772	0.949881		-0.730875	0.198472
ENSCAFG00000001020	CDKN2AIPNL	-0.777181	0.0149271		-0.829453	0.0153545		-0.436124	0.468959
ENSCAFG00000001021	JADE2	-0.618964	0.13143		-0.692675	0.0907255		-0.535513	0.557822
ENSCAFG00000001022	BAK1	1.15826	0.000423625		1.20887	0.000583819		1.28381	0.0114217
ENSCAFG00000001023	MEI1	1.34152	0.0933966		1.25218	0.142387		1.59915	0.0926495
ENSCAFG00000001026	NKAIN2	-1.76931	0.339059		-1.38115	0.502583		-3.45944	NA
ENSCAFG00000001027	FAM91A1	1.39925	0.00394759		1.34005	0.00593131		1.81735	0.0148005
ENSCAFG00000001028	RNF217	-1.49972	0.0169732		-1.255	0.0438047		-2.60823	0.00138956
ENSCAFG00000001029	TPD52L1	0.62582	0.519912		0.948253	0.259226		-1.17016	0.240518
ENSCAFG00000001030	HDDC2	0.00873528	0.990393		0.110723	0.86665		-0.402108	0.575918
ENSCAFG00000001033	ENSCAFG00000001033	-0.614866	0.673625		-1.26944	0.421344		0.173239	0.942638
ENSCAFG00000001034	SEC24A	-0.502793	0.227338		-0.442806	0.324225		-0.716647	0.327024
ENSCAFG00000001036	ENSCAFG00000001036	-0.490714	0.645645		-1.00281	0.341844		-0.0633432	0.970721
ENSCAFG00000001037	FER1L6	-1.71066	0.0664906		-1.85371	0.0584961		-2.1787	0.0414721
ENSCAFG00000001038	SNU13	0.775447	0.0236554		0.812734	0.0269323		0.601427	0.216572
ENSCAFG00000001040	TRMT12	0.273689	0.543749		0.312537	0.473334		0.00869168	0.992256
ENSCAFG00000001043	XRCC6	0.269115	0.24059		0.244142	0.204406		0.329838	0.561573
ENSCAFG00000001044	TATDN1	0.532796	0.109676		0.303013	0.294697		1.00268	0.0046579
ENSCAFG00000001045	NDUFB9	0.352871	0.304691		0.30055	0.443421		0.482119	0.363585
ENSCAFG00000001046	DESI1	1.10561	3.97524e-05		1.14122	0.000259937		1.24076	0.00173423
ENSCAFG00000001047	NCOA7	-0.652297	0.102729		-0.50928	0.0762229		-1.26095	0.0901137
ENSCAFG00000001048	DDX46	-0.159106	0.61353		-0.0642798	0.854753		-0.643441	0.124304
ENSCAFG00000001049	PMM1	0.00937636	0.988466		0.0240431	0.969715		-0.26269	0.782947
ENSCAFG00000001050	MTSS1	-0.236006	0.793452		0.0741998	0.937092		-1.77049	0.000240252
ENSCAFG00000001051	CSDC2	-3.49063	1.11451e-06		-3.68371	6.40154e-07		-3.66679	0.000672611
ENSCAFG00000001052	HINT3	-1.89023	6.92976e-06		-1.91356	1.03876e-07		-1.94768	0.0367155
ENSCAFG00000001053	POLR3H	0.535323	0.142452		0.478108	0.20454		0.553498	0.40042
ENSCAFG00000001056	SQLE	2.63747	1.90326e-07		2.75374	2.25523e-08		2.48416	0.00750618
ENSCAFG00000001057	TRMT11	-0.225849	0.544339		-0.184089	0.577532		-0.47065	0.547745
ENSCAFG00000001058	TXNDC15	-0.233254	0.538857		-0.217617	0.551126		0.160872	0.823357
ENSCAFG00000001059	ENSCAFG00000001059	0.227257	NA		0.104439	NA		0.252372	NA
ENSCAFG00000001062	CATSPER3	-0.687844	0.353782		-0.538426	0.504277		-1.38223	0.208476
ENSCAFG00000001064	ENSCAFG00000001064	0.730666	0.224672		0.731649	0.214581		0.795457	0.509164
ENSCAFG00000001065	PITX1	-3.93407	1.7287e-08		-4.08943	3.32408e-12		-3.76161	0.00145868
ENSCAFG00000001066	ENSCAFG00000001066	0.684368	0.347941		0.658891	0.383875		0.418389	0.796105
ENSCAFG00000001067	RSPO3	-7.06089	2.93447e-14		-6.59209	2.94773e-15		-9.10159	6.53008e-12
ENSCAFG00000001068	RNF146	-0.911235	7.02573e-06		-0.839218	9.65566e-05		-1.31354	0.000498914
ENSCAFG00000001069	ECHDC1	0.10875	0.798248		0.146566	0.741713		0.135064	0.805831
ENSCAFG00000001070	WASHC5	1.17057	0.00081716		1.26847	0.000703427		0.982162	0.0051198
ENSCAFG00000001071	SOGA3	-9.40339	9.41845e-23		-9.30229	4.85508e-21		-10.1934	7.94639e-13
ENSCAFG00000001075	ACO2	0.0396458	0.931442		-0.00554805	0.991803		-0.171185	0.793194
ENSCAFG00000001076	H2AFY	0.650166	0.00356577		0.705541	0.0011977		0.553314	0.231632
ENSCAFG00000001077	TRIB1	0.387109	0.638983		0.659109	0.360113		-0.87755	0.446862
ENSCAFG00000001078	THEMIS	-1.60669	0.276339		-1.9495	0.211301		2.38207	0.192325
ENSCAFG00000001080	ENSCAFG00000001080	0.189574	NA		-0.204777	NA		0.38016	NA
ENSCAFG00000001081	TIFAB	0.512994	0.658518		0.572854	0.609838		0.518619	0.846907
ENSCAFG00000001082	FAM84B	1.05809	0.120765		0.891059	0.167593		2.69884	0.00577757
ENSCAFG00000001084	CXCL14	-0.230088	0.794899		0.00893454	0.992521		-1.31354	0.276907
ENSCAFG00000001085	SLC25A48	-1.69643	0.229337		-2.08154	0.103814		3.70521	NA
ENSCAFG00000001086	MYC	-0.0930137	0.924326		0.245374	0.724891		-1.78364	0.0832848
ENSCAFG00000001087	GSDMC	3.28905	0.19126		2.77417	NA		4.07963	NA
ENSCAFG00000001090	PHF5A	0.884629	0.00419921		0.795916	0.0112608		1.4513	0.00154033
ENSCAFG00000001091	TGFBI	-1.96754	0.0185483		-1.98544	0.0162625		-1.86103	0.23676
ENSCAFG00000001092	TOB2	-1.05915	0.00380253		-1.22673	0.000971076		-0.708962	0.0554419
ENSCAFG00000001093	FAM49B	0.934671	0.00156568		0.887968	0.0084835		1.16926	0.0292573
ENSCAFG00000001094	SMAD5	-0.867653	0.0952637		-0.817486	0.116124		-1.1498	0.116294
ENSCAFG00000001095	TEF	-1.11522	0.0759806		-1.59605	0.000144742		0.527916	0.543416
ENSCAFG00000001096	ASAP1	-0.315753	0.545262		-0.174641	0.725508		-0.837437	0.255014
ENSCAFG00000001097	ADCY8	-2.9825	0.00650975		-3.15739	0.0103487		5.42797	0.000544979
ENSCAFG00000001098	ENSCAFG00000001098	0.809886	0.268317		0.957514	0.172615		0.0914165	0.945833
ENSCAFG00000001100	EFR3A	-1.16704	0.0070561		-1.09273	0.0218527		-1.75249	0.000805603
ENSCAFG00000001101	PTPRK	1.00281	0.0392623		1.1785	0.00115486		0.317505	0.75625
ENSCAFG00000001102	Oc90	0.338932	NA		0.44059	NA		NA	NA
ENSCAFG00000001103	TRPC7	2.6173	0.23184		2.23621	NA		2.86916	NA
ENSCAFG00000001104	RANGAP1	0.0461406	0.887199		-0.0144699	0.962617		0.240418	0.684141
ENSCAFG00000001105	KCNQ3	-2.21408	NA		-2.57666	NA		-2.25324	NA
ENSCAFG00000001106	LAMA2	-3.08497	1.88207e-06		-3.18813	9.60925e-08		-3.06356	0.00450168
ENSCAFG00000001108	LRRC6	-1.65586	0.18597		-2.93064	0.000273497		1.03678	0.182258
ENSCAFG00000001112	CHADL	-2.89887	1.03546e-05		-3.46223	1.35167e-10		-1.58389	0.131853
ENSCAFG00000001113	TMEM71	-0.499957	0.617549		-0.890762	0.312743		1.85246	0.120743
ENSCAFG00000001114	ARHGAP18	0.247254	0.708706		0.415522	0.465365		-0.253315	0.756939
ENSCAFG00000001115	L3MBTL3	0.890992	0.033074		1.01897	0.00870203		0.600287	0.366535
ENSCAFG00000001116	SAMD3	0.413389	NA		0.412574	NA		0.544292	NA
ENSCAFG00000001117	TMEM200A	0.0984415	0.946982		-0.0185103	0.991277		3.14467	0.000408729
ENSCAFG00000001120	L3MBTL2	0.357914	0.0770694		0.35359	0.12802		0.223512	0.558216
ENSCAFG00000001124	PHF20L1	0.508427	0.252768		0.249591	0.52118		0.932378	0.127526
ENSCAFG00000001125	EP300	0.012519	0.974512		-0.0120301	0.971681		0.0575738	0.931806
ENSCAFG00000001126	KLHL3	-1.1772	0.0210567		-1.16951	0.0305614		-1.51036	0.0215604
ENSCAFG00000001128	TG	0.514192	0.496786		0.344974	0.667892		1.69873	0.187218
ENSCAFG00000001130	ITPR3	1.72452	7.65124e-05		1.86394	1.20764e-05		1.25359	0.10074
ENSCAFG00000001131	SLA	2.49618	0.00323183		2.62259	0.000731636		2.82919	0.0396047
ENSCAFG00000001132	HNRNPA0	-0.265264	0.339059		-0.212141	0.48602		-0.231912	0.634521
ENSCAFG00000001133	WISP1	-0.391786	0.705259		-1.09482	0.0785503		1.23465	0.31725
ENSCAFG00000001134	XPNPEP3	0.391062	0.187645		0.276025	0.365666		0.692241	0.10692
ENSCAFG00000001136	EPB41L2	-2.17162	9.30014e-08		-2.27885	4.51777e-10		-1.89234	0.0253783
ENSCAFG00000001137	DNAJB7	0.269022	0.781005		0.0483799	0.968305		0.353829	0.762865
ENSCAFG00000001138	ENSCAFG00000001138	-1.46421	NA		-1.48072	NA		-1.99006	NA
ENSCAFG00000001139	ST13	0.52928	0.00080236		0.531605	0.00318994		0.439972	0.280296
ENSCAFG00000001140	MYOT	0.354883	0.72512		-0.21695	0.802628		1.33584	0.309476
ENSCAFG00000001141	NDRG1	1.58435	0.000509856		1.62992	2.02588e-05		1.66423	0.0425305
ENSCAFG00000001142	SLC25A17	0.469579	0.0942069		0.392198	0.195766		0.892073	0.0205482
ENSCAFG00000001143	MCHR1	-0.959422	0.281775		-0.894829	0.351268		0.291224	0.863961
ENSCAFG00000001144	ENSCAFG00000001144	-0.442902	NA		-0.651919	NA		0.54428	NA
ENSCAFG00000001145	TRIM11	0.933763	0.0163889		0.791919	0.0472293		1.80274	0.000407255
ENSCAFG00000001146	PKD2L2	0.386899	0.63363		0.225449	0.816485		0.321396	0.849574
ENSCAFG00000001147	AKAP7	-1.26473	6.74765e-10		-1.30859	9.80749e-09		-1.03546	0.00274138
ENSCAFG00000001148	ST3GAL1	2.39953	5.57483e-05		2.04824	8.30791e-05		4.06711	1.10314e-05
ENSCAFG00000001149	CTSL	-0.415447	0.616937		-0.13903	0.870983		-1.80443	0.068132
ENSCAFG00000001152	FAM13B	-0.536059	0.130564		-0.529762	0.130654		-0.625847	0.287797
ENSCAFG00000001154	MKL1	0.50304	0.23638		0.467013	0.236773		0.751566	0.324381
ENSCAFG00000001159	ZFAT	1.15654	0.0193686		0.65065	0.00829957		2.50986	1.17642e-12
ENSCAFG00000001161	OBSCN	2.40353	0.00573122		1.72079	0.014269		3.9845	0.000167851
ENSCAFG00000001162	WNT8A	-1.29646	NA		-1.31526	NA		-0.177072	NA
ENSCAFG00000001165	4933408B17Rik	0.0597111	NA		0.104434	NA		-0.417483	NA
ENSCAFG00000001166	KHDRBS3	-3.1076	0.000710944		-4.87438	1.44801e-13		-1.85071	0.0117948
ENSCAFG00000001167	IBA57	1.27399	0.000877557		1.14821	0.00241295		2.00328	0.000823233
ENSCAFG00000001168	LOC100685453	0.674004	NA		0.188473	NA		1.82016	NA
ENSCAFG00000001170	ENSCAFG00000001170	-1.07883	NA		-0.999132	NA		-1.13883	NA
ENSCAFG00000001172	SGSM3	1.5204	0.000130069		1.32554	0.000234306		2.80007	6.23011e-08
ENSCAFG00000001173	FAM135B	-2.16109	NA		-2.13769	NA		-2.91652	NA
ENSCAFG00000001174	GUK1	0.961626	0.00799394		0.81292	0.0271534		1.45969	0.00191339
ENSCAFG00000001176	MRPL55	0.884875	0.0838926		0.712702	0.169532		1.61946	0.0433867
ENSCAFG00000001177	C1orf35	0.0175873	0.984491		-0.467871	0.372703		0.750837	0.480257
ENSCAFG00000001178	COL22A1	0.807028	0.57184		0.1116	0.948053		2.83633	0.133198
ENSCAFG00000001179	WNT3A	5.10116	0.0151486		5.55912	0.00347271		0.544292	NA
ENSCAFG00000001180	KCNK9	-1.31781	NA		-1.26821	NA		-1.9925	NA
ENSCAFG00000001181	TRAPPC9	1.32446	2.62559e-09		1.34107	2.39757e-07		1.29053	1.05674e-05
ENSCAFG00000001184	PRSS38	0.674011	NA		0.44059	NA		1.27278	NA
ENSCAFG00000001185	ENSCAFG00000001185	1.01347	0.585625		0.999124	0.679133		0.646654	NA
ENSCAFG00000001186	BRD8	-0.411416	0.321545		-0.485671	0.24096		-0.281787	0.733693
ENSCAFG00000001187	JMJD4	0.753044	0.0772548		0.466724	0.226858		1.58289	1.06132e-05
ENSCAFG00000001188	IP6K3	-3.23749	0.0395156		-2.98128	0.0645878		-4.37162	0.0181865
ENSCAFG00000001189	OR6F1	0.674004	NA		0.44059	NA		1.34972	NA
ENSCAFG00000001191	LEMD2	0.0321933	0.945513		-0.0210073	0.964185		0.563185	0.422214
ENSCAFG00000001194	MLN	-1.74129	0.653686		-1.74093	0.60626		-0.177089	NA
ENSCAFG00000001196	AGO2	0.530125	0.206859		0.692052	0.0678174		-0.255358	0.730237
ENSCAFG00000001197	ENSCAFG00000001197	0.576737	NA		0.707116	NA		-0.546986	NA
ENSCAFG00000001198	AAED1	-0.596629	0.0260287		-0.505984	0.0668764		-1.07952	0.00726049
ENSCAFG00000001199	ENSCAFG00000001199	-1.56922	NA		-1.61878	NA		-0.417507	NA
ENSCAFG00000001201	CDC14B	-0.484482	0.304691		-0.375186	0.355909		-0.92367	0.240656
ENSCAFG00000001202	GRM4	-0.833254	0.709517		-0.543041	0.827641		-2.22291	NA
ENSCAFG00000001204	KIF20A	1.80639	0.0362516		2.10667	0.00686596		-0.154295	NA
ENSCAFG00000001205	HABP4	-0.714537	0.0653023		-0.631458	0.118062		-1.27397	0.0315247
ENSCAFG00000001207	ENSCAFG00000001207	1.34985	0.0846565		1.51878	0.0673829		0.528864	0.655876
ENSCAFG00000001208	ENSCAFG00000001208	0.260113	0.76476		0.204579	0.836272		0.780597	0.604643
ENSCAFG00000001209	CDC23	-0.319469	0.380544		-0.15796	0.657817		-1.06722	0.0233888
ENSCAFG00000001210	ENSCAFG00000001210	0.0954073	0.904241		0.102945	0.898877		0.301579	0.786457
ENSCAFG00000001211	HMGA1	2.30246	0.000852692		2.50138	4.39922e-05		1.50243	0.147155
ENSCAFG00000001212	NUDT3	-0.130136	0.680924		-0.0985231	0.792075		0.158174	0.708598
ENSCAFG00000001213	ZNF367	-0.557323	0.303172		-0.236966	0.564177		-2.1477	1.80871e-05
ENSCAFG00000001214	RPS10	-0.04186	0.939362		0.0694911	0.899509		-0.311795	0.464991
ENSCAFG00000001215	GFRA3	-0.867862	0.429737		-0.924102	0.294111		-0.269783	0.901423
ENSCAFG00000001216	SLC35D2	0.296465	0.666763		0.596193	0.208534		-1.25171	0.0680715
ENSCAFG00000001217	PTK2	0.48335	0.111689		0.461917	0.119615		0.453813	0.46647
ENSCAFG00000001218	HSD17B3	-2.55684	0.1577		-2.23155	0.177114		-3.62159	NA
ENSCAFG00000001219	ERCC6L2	-1.21324	2.69199e-05		-1.16493	0.000154432		-1.55051	0.000273325
ENSCAFG00000001220	CDC25C	1.83067	0.008776		2.05399	0.00415337		0.794002	0.624262
ENSCAFG00000001221	PACSIN1	-2.58713	7.89595e-12		-2.65896	7.58092e-10		-2.82239	1.31287e-08
ENSCAFG00000001225	FAM53C	-1.04895	9.34102e-07		-1.06274	5.93254e-06		-1.2519	0.000255942
ENSCAFG00000001226	TRIM58	-0.182287	NA		-0.119668	NA		-0.177057	NA
ENSCAFG00000001227	SPDEF	1.62103	0.258612		1.7014	0.289808		3.15143	0.0246493
ENSCAFG00000001228	DENND3	1.61549	1.99277e-05		1.61496	6.11377e-05		1.72281	0.0412588
ENSCAFG00000001229	C6orf106	-0.800153	0.00105406		-0.729872	0.00180124		-1.11107	0.0401889
ENSCAFG00000001230	GNG5	-0.890021	0.236017		-0.916764	0.270155		-0.988551	0.505121
ENSCAFG00000001231	ENSCAFG00000001231	0.132899	0.752584		0.22687	0.48377		-0.230625	0.769938
ENSCAFG00000001232	SLC45A4	1.09647	4.72459e-05		1.09735	0.000181207		0.994221	0.0678117
ENSCAFG00000001233	KDM3B	-0.0848662	0.852185		0.0709151	0.857612		-0.715942	0.150889
ENSCAFG00000001234	UHRF1BP1	0.00360854	0.995116		0.0467567	0.931712		-0.105374	0.88565
ENSCAFG00000001235	GPR20	-1.65787	NA		-0.75172	NA		-8.11386	2.46803e-09
ENSCAFG00000001237	PTP4A3	0.329988	0.65701		0.512183	0.326956		-0.436204	0.723647
ENSCAFG00000001239	TAF11	-0.238192	0.380476		-0.161398	0.546209		-0.406468	0.428947
ENSCAFG00000001244	REEP2	-4.50715	1.56757e-15		-4.61148	2.1291e-12		-4.62387	2.87843e-09
ENSCAFG00000001246	PTCH1	-1.13009	0.00428112		-1.11641	0.00673476		-1.25469	0.0503544
ENSCAFG00000001250	MROH5	0.791773	0.448819		0.836568	0.378704		0.776072	0.714526
ENSCAFG00000001254	EGR1	0.693458	0.50194		0.27003	NA		0.729005	0.670928
ENSCAFG00000001255	TNRC6B	0.398136	0.0179962		0.435739	0.0195853		0.281028	0.470305
ENSCAFG00000001264	TSNARE1	0.548632	0.431076		0.09812	0.840752		1.42027	0.166649
ENSCAFG00000001269	ADGRB1	-3.20871	0.00659759		-2.91069	0.00879737		-4.53345	0.02303
ENSCAFG00000001272	Mroh4	-3.80459	0.0420621		-3.47805	0.0373401		-5.04862	NA
ENSCAFG00000001277	ANKS1A	-0.677781	0.00738942		-0.550808	0.0288304		-1.29231	0.000105204
ENSCAFG00000001280	SLURP1	7.64037	6.26736e-11		7.78731	3.30021e-11		6.76197	0.000179621
ENSCAFG00000001281	LYPD2	5.13376	1.76591e-09		5.19321	6.11506e-08		6.7251	3.89851e-11
ENSCAFG00000001282	ETF1	0.0214899	0.967973		0.172389	0.710549		-0.688474	0.199218
ENSCAFG00000001285	CYP11B2	0.413389	NA		NA	NA		2.14661	NA
ENSCAFG00000001286	FANCC	-0.192541	0.72445		0.104109	0.811247		-1.54822	0.00210195
ENSCAFG00000001287	TCP11	-1.40681	0.0422403		-1.26537	0.0956914		-2.1667	0.023601
ENSCAFG00000001288	FAM83F	2.45617	0.000238296		2.34859	0.00143536		4.45612	1.55542e-07
ENSCAFG00000001289	LY6E	2.25458	0.0198744		2.00069	0.0436851		3.77882	0.000118624
ENSCAFG00000001290	AKR1B1	-0.509051	0.289501		-0.393887	0.42661		-1.15974	0.0730689
ENSCAFG00000001292	LY6H	-3.45334	NA		-3.25028	0.149832		-4.48498	NA
ENSCAFG00000001293	HSPA9	0.335268	0.335551		0.45418	0.198081		-0.248031	0.609334
ENSCAFG00000001296	GRAP2	-0.609097	0.468561		-0.932913	0.220327		1.37675	0.235752
ENSCAFG00000001297	RHPN1	1.19816	0.144258		0.352455	0.507414		2.8202	0.000796108
ENSCAFG00000001298	SCUBE3	-2.29005	0.00393259		-2.52188	0.000960783		-2.24277	0.0501148
ENSCAFG00000001299	ZC3H3	0.791209	0.0473801		0.578962	0.0535488		1.44298	0.0318055
ENSCAFG00000001300	SLC35B4	0.45044	0.431195		0.418479	0.501878		0.138024	0.884672
ENSCAFG00000001301	GSDMD	1.98464	0.00039791		1.68493	0.00047252		3.37608	3.58022e-07
ENSCAFG00000001302	ENSCAFG00000001302	1.5482	0.119811		1.47488	0.134126		1.6094	0.410036
ENSCAFG00000001303	ENTHD1	-1.76073	NA		-1.75242	NA		-1.13885	NA
ENSCAFG00000001304	ZNF76	-0.364494	0.270743		-0.468984	0.142484		0.0448413	0.937623
ENSCAFG00000001305	FBP1	2.33139	0.000862669		2.248	0.00325456		4.59437	1.05065e-07
ENSCAFG00000001306	LRGUK	-0.84659	0.337487		-1.10542	0.168024		-0.666768	0.617514
ENSCAFG00000001307	DEF6	-0.0329033	0.965263		0.111283	0.872358		-0.423183	0.599617
ENSCAFG00000001308	EXOC4	-0.324608	0.321408		-0.358418	0.334593		-0.377034	0.441771
ENSCAFG00000001310	PPARD	0.564012	0.133461		0.693797	0.0310542		0.132862	0.856213
ENSCAFG00000001312	CHCHD3	0.443894	0.319549		0.514098	0.291951		-0.0767195	0.91668
ENSCAFG00000001313	FANCE	0.410597	0.255541		0.377411	0.15897		0.70466	0.404312
ENSCAFG00000001314	CACNA1I	4.22686	3.1519e-08		4.23209	1.03017e-07		3.84359	2.44618e-05
ENSCAFG00000001315	CTNNA1	0.92177	0.0106305		1.08118	0.000380386		0.392162	0.43754
ENSCAFG00000001316	DAPK1	0.266982	0.587505		0.25299	0.623564		0.503282	0.585311
ENSCAFG00000001317	EEF1D	0.86145	0.0254867		0.87498	0.0300031		0.913913	0.128657
ENSCAFG00000001318	RPL10A	0.0872372	0.869093		0.17932	0.737662		-0.0379222	0.950583
ENSCAFG00000001319	TIGD5	-0.315603	0.500588		-0.461904	0.178178		-0.0563798	0.959117
ENSCAFG00000001324	ATF4	-0.24257	0.471593		-0.195249	0.580263		-0.595205	0.33685
ENSCAFG00000001325	PYCR3	1.79401	1.97268e-07		1.61509	3.267e-07		2.74911	1.46729e-10
ENSCAFG00000001326	TEAD3	0.267761	0.363129		0.368341	0.153998		-0.147555	0.824776
ENSCAFG00000001330	SIL1	0.844632	0.00681889		0.926221	0.00409497		0.81211	0.0565942
ENSCAFG00000001331	ZCCHC6	0.0176479	0.964339		0.121727	0.714449		-0.441719	0.31872
ENSCAFG00000001332	TAB1	-0.0319394	0.927974		-0.0534167	0.883746		0.104529	0.886544
ENSCAFG00000001333	TSTA3	1.83118	5.71628e-08		1.63585	2.984e-08		2.96414	5.80371e-14
ENSCAFG00000001335	TULP1	0.923807	0.296513		0.954047	0.327319		4.13205	NA
ENSCAFG00000001336	ENSCAFG00000001336	-0.29261	0.400631		-0.204163	0.509001		-0.610667	0.386999
ENSCAFG00000001337	SYNGR1	1.0777	0.000434038		1.02668	0.00304184		1.52697	0.000324595
ENSCAFG00000001338	MAPK15	1.3947	0.198199		0.613702	0.482966		4.87031	1.50303e-09
ENSCAFG00000001339	ISCA1	-1.96792	0.00709483		-2.03984	0.00810145		-1.98293	0.0577024
ENSCAFG00000001341	ENSCAFG00000001341	0.21406	0.770948		0.218978	0.786075		0.298896	0.816868
ENSCAFG00000001343	FKBP5	-1.06586	0.0432041		-0.871996	0.0976176		-1.96097	0.00889985
ENSCAFG00000001344	NAA35	0.258263	0.166472		0.243978	0.214267		0.511153	0.175582
ENSCAFG00000001345	MATR3	-0.344233	0.12813		-0.284871	0.0798128		-0.474821	0.349817
ENSCAFG00000001346	RPL3	0.437315	0.265609		0.556764	0.144813		0.101973	0.82079
ENSCAFG00000001347	ENSCAFG00000001347	-3.48804	0.000647267		-3.56424	0.00213071		-3.49078	0.0313394
ENSCAFG00000001349	CLPS	0.774042	NA		0.663388	NA		0.544292	NA
ENSCAFG00000001350	GOLM1	-1.17878	0.0131372		-1.17764	0.0218704		-1.10659	0.210504
ENSCAFG00000001352	ENSCAFG00000001352	-0.97101	0.0381994		-1.09541	0.0097101		-0.84283	0.292366
ENSCAFG00000001354	MLANA	0.767086	NA		0.720724	NA		0.544292	NA
ENSCAFG00000001355	KIAA2026	-0.787022	0.0112804		-0.721434	0.00849686		-1.00248	0.0900746
ENSCAFG00000001356	PDGFB	0.760568	0.42436		1.11016	0.159036		-1.24454	0.347316
ENSCAFG00000001358	AGTPBP1	-1.11025	2.0077e-10		-1.10691	9.65851e-10		-1.0588	0.00965297
ENSCAFG00000001360	CBX7	-1.71194	7.55973e-06		-1.86178	7.31966e-06		-1.63003	0.0311242
ENSCAFG00000001361	APOBEC3Z3	-0.593146	0.535126		-0.823292	0.380956		1.52535	0.222742
ENSCAFG00000001362	PLXNA4	-1.83859	0.0233512		-1.81874	0.0286593		-2.23449	0.0465849
ENSCAFG00000001364	SRPK1	0.407892	0.285858		0.597954	0.0493493		-0.444787	0.324919
ENSCAFG00000001365	TPD52L3	0.774042	NA		0.663388	NA		0.544292	NA
ENSCAFG00000001367	NPTXR	-2.292	9.07584e-07		-2.46614	9.46635e-07		-2.34409	7.82355e-05
ENSCAFG00000001369	ENSCAFG00000001369	1.51766	NA		1.99884	NA		NA	NA
ENSCAFG00000001370	DNAL4	0.000243703	0.999598		-0.131828	0.777024		0.905018	0.0803845
ENSCAFG00000001371	SUN2	-0.621048	0.0510757		-0.653708	0.0612592		-0.629568	0.339051
ENSCAFG00000001372	SCRIB	1.18	0.00249022		0.947376	0.00140595		1.73318	0.0094668
ENSCAFG00000001376	SLC26A8	1.55129	NA		1.59896	NA		1.82439	NA
ENSCAFG00000001377	GTPBP1	-0.222135	0.410608		-0.257694	0.379097		-0.26167	0.600468
ENSCAFG00000001378	MAPK14	-0.283287	0.372501		-0.212906	0.51051		-0.571833	0.256644
ENSCAFG00000001379	JOSD1	-0.220867	0.419983		-0.310993	0.221748		0.0568924	0.925521
ENSCAFG00000001380	NTRK2	-4.23699	7.45121e-05		-4.28977	4.56072e-05		-4.38099	0.00242896
ENSCAFG00000001381	UHRF2	0.103759	0.84072		0.234476	0.607713		-0.432104	0.391725
ENSCAFG00000001382	MAPK13	2.56171	3.39413e-05		2.71436	2.27703e-05		2.3937	0.000200378
ENSCAFG00000001383	TOMM22	-0.166282	0.716102		-0.372538	0.208264		0.367021	0.626646
ENSCAFG00000001384	CBY1	-0.949856	0.0032924		-1.14873	0.000104122		-0.59382	0.31872
ENSCAFG00000001385	FAM227A	0.0800412	0.952169		-0.549954	0.637665		0.818918	0.510998
ENSCAFG00000001386	BRPF3	-0.966482	0.00807004		-0.727433	0.00226599		-2.06964	9.29035e-07
ENSCAFG00000001388	ENSCAFG00000001388	0.600488	0.229559		0.604608	0.262846		0.415219	0.671338
ENSCAFG00000001390	RMI1	-0.18013	0.571123		-0.153164	0.678792		0.10375	0.871355
ENSCAFG00000001391	DMC1	1.14961	0.190285		1.06769	0.278113		2.00897	0.0338746
ENSCAFG00000001392	PNPLA1	0.724861	0.651683		0.660793	0.701227		2.91074	0.061886
ENSCAFG00000001393	C6orf222	-0.0333721	NA		0.259676	NA		-1.13882	NA
ENSCAFG00000001394	ETV7	0.274705	0.804248		0.194509	0.87519		2.39243	0.00249999
ENSCAFG00000001395	DDX17	-0.282515	0.304318		-0.283364	0.304622		-0.414786	0.447968
ENSCAFG00000001396	ENSCAFG00000001396	0.238428	0.763373		0.280001	0.721811		-0.205096	0.902365
ENSCAFG00000001397	ENSCAFG00000001397	0.976071	0.363228		1.11235	0.296275		0.54285	0.738725
ENSCAFG00000001398	KCTD20	-0.112043	0.794692		-0.0827357	0.849783		-0.0930921	0.901784
ENSCAFG00000001399	HNRNPK	0.501559	0.0942069		0.666183	0.00809307		-0.216292	0.697652
ENSCAFG00000001400	PUF60	0.545681	0.023674		0.415271	0.0722544		0.882563	0.0180222
ENSCAFG00000001401	ENSCAFG00000001401	1.09422	NA		1.14223	NA		0.544292	NA
ENSCAFG00000001402	KDELR3	-0.230729	0.718196		-0.014316	0.982697		-1.181	0.134868
ENSCAFG00000001403	PODXL	0.129663	0.900026		0.384453	0.634026		-1.21577	0.361633
ENSCAFG00000001404	C9orf64	0.236506	0.603292		0.266754	0.546335		0.586246	0.40934
ENSCAFG00000001405	NRBP2	-0.0516609	0.956031		-0.554523	0.353408		0.940753	0.235658
ENSCAFG00000001406	MKLN1	0.410135	0.191675		0.335547	0.331391		0.430869	0.343995
ENSCAFG00000001407	KCNJ4	-5.04072	4.42273e-12		-4.94378	3.01012e-11		-5.67663	2.13448e-06
ENSCAFG00000001411	STK38	-0.321759	0.33455		-0.39174	0.249516		-0.290733	0.585781
ENSCAFG00000001413	CSNK1E	-0.0407162	0.912226		0.0621978	0.802009		-0.505691	0.398137
ENSCAFG00000001414	SRSF3	-0.031677	0.931332		0.109186	0.691231		-0.644198	0.146658
ENSCAFG00000001416	GLDC	-5.04083	7.44627e-06		-5.89443	1.83744e-13		-2.25427	0.126803
ENSCAFG00000001417	KIF27	-0.492138	0.477668		-0.466915	0.359923		-0.0903309	0.952658
ENSCAFG00000001418	RAB44	-0.928672	0.536017		-2.11852	0.0538298		0.479306	0.81448
ENSCAFG00000001420	TMEM184B	0.0988773	0.715179		0.0906814	0.76822		0.179025	0.74345
ENSCAFG00000001422	ENSCAFG00000001422	0.380671	0.357858		0.368423	0.42738		0.393113	0.605791
ENSCAFG00000001423	CPNE5	1.28649	0.307291		0.387568	0.71451		3.6377	0.0254247
ENSCAFG00000001424	PLA2G6	-0.782608	0.304043		-1.42827	0.0027004		0.324365	0.793963
ENSCAFG00000001425	GKAP1	-0.426863	0.380281		-0.27059	0.520209		-1.1438	0.157577
ENSCAFG00000001426	COPG2	0.864822	0.0224638		0.637361	0.0318375		1.87882	1.38303e-05
ENSCAFG00000001427	BAIAP2L2	2.13957	0.0567039		2.44188	0.0286094		0.270704	0.858405
ENSCAFG00000001428	PPIL1	-0.0985607	0.808149		-0.0827996	0.838048		0.0962682	0.896484
ENSCAFG00000001429	SLC16A8	2.79816	0.0114776		2.62409	0.0329147		3.86024	0.0169983
ENSCAFG00000001431	PICK1	1.02575	0.000246578		0.807273	3.33006e-05		1.83729	1.0096e-06
ENSCAFG00000001432	C6orf89	-0.24801	0.387034		-0.172696	0.556179		-0.399711	0.455365
ENSCAFG00000001433	PLEC	0.739064	0.0966115		0.909734	0.0236116		-0.0843116	0.914773
ENSCAFG00000001434	KDM4C	-0.73569	0.0148822		-0.643175	0.0223729		-1.21643	0.019615
ENSCAFG00000001435	UBQLN1	0.725805	0.0136893		0.834686	0.000316839		0.361552	0.590952
ENSCAFG00000001436	SOX10	-0.589837	0.646928		-0.174269	0.893354		-2.37442	0.0743629
ENSCAFG00000001437	POLR2F	0.253787	0.466858		0.227561	0.515227		0.229133	0.732173
ENSCAFG00000001438	PI16	-7.19544	3.17521e-38		-7.15395	4.0456e-30		-7.5663	2.36862e-19
ENSCAFG00000001439	C22orf23	-0.512638	0.121021		-0.576428	0.0906142		-0.670649	0.274598
ENSCAFG00000001441	MTCH1	0.00292233	0.994407		-0.010961	0.976224		0.110348	0.882113
ENSCAFG00000001442	MICALL1	-0.883488	0.0391481		-0.847098	0.0733008		-1.42125	0.00320077
ENSCAFG00000001443	EIF3L	0.0744474	0.86284		0.18149	0.650246		-0.468125	0.432514
ENSCAFG00000001444	FGD2	0.00666574	0.995166		-0.48292	0.502104		1.55911	0.167113
ENSCAFG00000001445	GRINA	1.50514	7.44558e-05		1.30663	0.000131013		2.4838	1.18626e-07
ENSCAFG00000001446	FRMD3	-1.96317	0.0166121		-1.60614	0.035936		-3.95176	7.14929e-05
ENSCAFG00000001447	GALR3	1.06536	NA		1.05164	NA		1.85092	NA
ENSCAFG00000001448	PIM1	-0.0671706	0.924625		0.227276	0.585557		-1.52091	0.0301763
ENSCAFG00000001449	SPATC1	-0.121802	NA		-0.489102	NA		1.18472	NA
ENSCAFG00000001450	MEST	0.485803	0.615427		-0.0327741	0.977392		0.827566	0.536514
ENSCAFG00000001453	RASEF	1.71884	0.00539038		1.75628	0.0124358		2.71686	0.00455314
ENSCAFG00000001456	GCAT	0.977025	0.1268		0.848423	0.200938		2.28562	0.00789323
ENSCAFG00000001457	SPATA31D1	-4.55972	0.000159295		-4.59967	0.000167739		-4.64099	0.0083102
ENSCAFG00000001458	TBC1D22B	-0.289381	0.274036		-0.314315	0.241722		-0.0299803	0.960788
ENSCAFG00000001459	CEP41	0.174135	0.674394		0.137229	0.738508		0.0311095	0.966591
ENSCAFG00000001460	PTPRD	-3.01518	0.000164684		-3.56699	1.84512e-07		-1.4092	0.318545
ENSCAFG00000001462	TLE1	-3.0878	NA		-2.91786	1.1441e-10		-3.86838	2.11559e-20
ENSCAFG00000001468	ENSCAFG00000001468	-0.852087	0.246199		-0.819706	0.213676		-0.61534	0.725649
ENSCAFG00000001469	ENSCAFG00000001469	0.980159	NA		0.949707	NA		0.544292	NA
ENSCAFG00000001472	ENSCAFG00000001472	-3.76486	0.00776304		-4.19932	0.00722176		-4.04772	0.0204572
ENSCAFG00000001473	ENSCAFG00000001473	-0.00732451	0.995977		-0.356572	0.79377		0.372173	0.8463
ENSCAFG00000001474	ENSCAFG00000001474	0.37984	0.814133		0.181738	0.922618		0.694339	NA
ENSCAFG00000001475	ENSCAFG00000001475	-0.0233175	0.979501		0.105359	0.900608		-0.696532	0.578232
ENSCAFG00000001477	CMTR1	-0.201511	0.573327		-0.296982	0.40235		0.054614	0.922763
ENSCAFG00000001478	TYRP1	-0.200908	NA		0.0819977	NA		-1.13882	NA
ENSCAFG00000001479	ENSCAFG00000001479	-2.24237	NA		-2.13482	NA		-2.68163	NA
ENSCAFG00000001480	TRIOBP	-0.632579	0.0702312		-0.429119	0.122797		-1.54592	0.000229144
ENSCAFG00000001484	LGALS2	-2.42062	0.000859829		-2.10208	NA		-3.77593	8.23304e-08
ENSCAFG00000001486	CPA5	1.88531	0.310601		1.349	NA		1.84936	NA
ENSCAFG00000001487	LGALS1	-3.17772	3.96418e-08		-3.41483	2.45203e-10		-3.04933	0.003757
ENSCAFG00000001488	MDGA1	3.26168	1.85669e-05		3.67255	2.48872e-11		0.908608	0.504408
ENSCAFG00000001489	ZFAND3	-0.611785	0.0487609		-0.529986	0.113684		-1.14155	0.0257681
ENSCAFG00000001490	SH3BP1	0.484947	0.39929		0.429565	0.506726		1.10777	0.168602
ENSCAFG00000001492	BTBD9	-1.38702	2.05878e-07		-1.26925	2.93986e-06		-1.88237	3.37693e-07
ENSCAFG00000001494	SSMEM1	-0.442902	NA		-0.399801	NA		-0.177057	NA
ENSCAFG00000001495	TMEM209	1.59868	1.16903e-07		1.53337	5.29375e-06		2.04145	1.81426e-05
ENSCAFG00000001496	GGA1	0.16779	0.509927		0.17347	0.497654		0.0507599	0.936385
ENSCAFG00000001497	KLHDC10	0.0527341	0.939601		-0.11534	0.844548		0.441837	0.613898
ENSCAFG00000001498	MPDZ	-4.45356	4.00759e-18		-4.34491	7.46186e-15		-5.18717	2.48039e-15
ENSCAFG00000001499	ZC3HC1	0.693069	0.0947993		0.480402	0.252776		0.816496	0.224804
ENSCAFG00000001500	OPLAH	1.02393	0.0411622		0.731576	0.105316		1.45083	0.0779837
ENSCAFG00000001501	CDC42EP1	-1.34959	0.0858557		-0.894441	0.235943		-3.51052	1.48478e-09
ENSCAFG00000001502	CARD10	0.0398711	0.956174		0.203392	0.755868		-0.631879	0.559719
ENSCAFG00000001503	MFNG	-0.448721	0.468813		-0.618253	0.279054		0.212189	0.877657
ENSCAFG00000001504	ENSCAFG00000001504	-2.32787	0.146212		-3.79105	0.00308611		-0.0586983	0.980548
ENSCAFG00000001505	UBE2H	-0.213893	0.616249		-0.210088	0.622286		-0.499861	0.46073
ENSCAFG00000001506	CYTH4	0.282328	0.735616		-0.0697081	0.927266		2.38799	0.00499238
ENSCAFG00000001507	NRF1	0.174831	0.409418		0.133241	0.482966		0.314936	0.482703
ENSCAFG00000001508	RAC2	-0.270995	0.820046		-0.601255	0.568256		2.22695	0.156403
ENSCAFG00000001511	IL2RB	-0.422972	0.739889		-0.575623	0.665264		2.06551	0.124124
ENSCAFG00000001512	TMPRSS6	-0.256094	0.812345		-0.165644	0.88728		0.0315979	0.97957
ENSCAFG00000001513	KCTD17	-0.117837	0.774767		-0.000439505	0.999334		-0.666516	0.256935
ENSCAFG00000001514	MPST	0.730308	0.108207		0.55648	0.193173		1.51085	0.0328338
ENSCAFG00000001515	STRIP2	-0.0550864	0.956031		0.128006	0.898937		-0.978046	0.359665
ENSCAFG00000001516	TST	1.75432	0.00755548		1.68713	0.0143268		2.2794	0.00757732
ENSCAFG00000001517	TEX33	-2.05395	NA		-1.69349	NA		-3.40528	NA
ENSCAFG00000001518	DNAH8	-4.01278	2.41692e-05		-4.65593	1.34412e-06		-3.38811	0.00458068
ENSCAFG00000001519	CSF2RB	-1.01382	0.129687		-1.03982	0.15174		-1.14132	0.388335
ENSCAFG00000001520	NFIB	-1.11423	0.00263136		-0.904096	0.00315359		-2.05576	3.65425e-07
ENSCAFG00000001521	EXOSC4	0.850435	0.0432477		0.702534	0.118142		1.53174	0.00269792
ENSCAFG00000001522	NCF4	2.74048	0.000664612		2.62644	0.000275049		3.25966	0.00786291
ENSCAFG00000001523	GPAA1	1.24365	4.67407e-05		1.04957	9.23845e-05		1.96339	1.19129e-07
ENSCAFG00000001524	AHCYL2	-0.622425	0.150678		-0.830225	0.0222826		-0.288357	0.715363
ENSCAFG00000001525	PVALB	0.0597107	NA		0.104434	NA		0.544279	NA
ENSCAFG00000001526	IFT27	0.578513	0.174421		0.52156	0.241841		0.713347	0.379692
ENSCAFG00000001529	CYC1	0.519067	0.251358		0.332159	0.49751		0.769984	0.193439
ENSCAFG00000001530	LOC100688210	0.597254	0.313566		0.562726	0.31034		0.802153	0.476608
ENSCAFG00000001531	SMO	0.371693	0.669563		0.328764	0.699783		0.424564	0.720857
ENSCAFG00000001532	ZDHHC21	-0.274993	0.559586		-0.306911	0.525353		-0.13019	0.884672
ENSCAFG00000001533	TSPAN33	0.393986	0.75301		-0.299385	0.778985		3.42414	8.75899e-05
ENSCAFG00000001534	TLE4	-0.354882	0.282502		-0.287864	0.442471		-0.591822	0.231827
ENSCAFG00000001535	CER1	0.841556	NA		0.942477	NA		0.544292	NA
ENSCAFG00000001536	SHARPIN	0.868089	0.0226562		0.651941	0.0768145		1.33971	0.0130468
ENSCAFG00000001537	FREM1	0.448568	0.750095		0.666982	0.607423		-0.911462	0.574521
ENSCAFG00000001540	WDR97	-0.0166863	0.980438		-0.235433	0.646474		0.352463	0.728137
ENSCAFG00000001541	HGH1	0.974092	0.000288299		1.0221	2.2743e-05		0.719977	0.238768
ENSCAFG00000001542	Tssk5	0.377021	NA		-0.0629107	NA		1.85926	NA
ENSCAFG00000001543	TNPO3	0.302585	0.277156		0.229909	0.451757		0.482315	0.125085
ENSCAFG00000001544	EIF3D	0.305894	0.353862		0.419666	0.199709		-0.201411	0.61981
ENSCAFG00000001545	TTC39B	-0.952824	0.296035		-0.983208	0.317998		-0.979311	0.35257
ENSCAFG00000001546	MROH1	1.92079	0.00131619		1.28795	7.62082e-05		3.32249	4.0505e-07
ENSCAFG00000001547	GLP1R	-2.15371	0.284889		-1.8643	0.34268		-3.63598	NA
ENSCAFG00000001548	SNAPC3	-0.799783	0.000160709		-0.726529	0.000559528		-1.12211	0.0161279
ENSCAFG00000001549	SAYSD1	-0.0756728	0.904959		-0.192054	0.740967		0.941954	0.180771
ENSCAFG00000001550	FOXRED2	2.14438	0.000739441		1.99297	0.00251364		4.04745	2.895e-09
ENSCAFG00000001551	PSIP1	-0.824137	0.032353		-0.626053	0.0206654		-1.70225	0.00599764
ENSCAFG00000001553	TXN2	-0.0320991	0.952169		-0.281241	0.376448		0.436085	0.527955
ENSCAFG00000001554	BOP1	1.22193	0.00306574		1.05225	0.000610694		1.39467	0.0676754
ENSCAFG00000001556	KCNK17	-1.88752	0.109694		-1.80494	0.128641		-2.41429	0.114182
ENSCAFG00000001557	CCDC171	-0.672667	0.140775		-0.628842	0.156273		-0.710035	0.398498
ENSCAFG00000001559	ENSCAFG00000001559	1.33216	0.221827		-0.0895972	0.933518		2.5535	0.0228907
ENSCAFG00000001560	KIF6	0.757087	0.609624		0.51364	0.765197		2.05384	NA
ENSCAFG00000001562	BNC2	-5.38424	4.68523e-24		-5.33928	4.59163e-21		-6.01214	7.1065e-19
ENSCAFG00000001563	HSF1	1.11618	0.00232034		0.948636	0.0031984		1.69469	0.00275369
ENSCAFG00000001564	LOC106559905	0.580925	NA		0.664691	NA		0.544292	NA
ENSCAFG00000001565	DAAM2	-1.45778	0.0339703		-1.28729	0.045373		-2.17819	0.0510896
ENSCAFG00000001566	CNTLN	-3.33514	9.31298e-07		-4.20687	1.64024e-11		-2.73103	1.10201e-08
ENSCAFG00000001567	SH3GL2	0.474316	0.733042		-0.0420404	0.979652		3.21286	0.000132268
ENSCAFG00000001568	MOCS1	-0.582649	0.21564		-0.382185	0.34476		-1.48588	0.0359937
ENSCAFG00000001569	RECQL4	1.74986	0.0096917		1.20625	0.0125263		2.25221	NA
ENSCAFG00000001570	PSAT1	0.845028	0.188047		0.987949	0.156758		0.0867575	0.947663
ENSCAFG00000001571	LRFN2	3.54878	0.00477011		3.29759	0.00257805		5.44743	NA
ENSCAFG00000001572	UNC5CL	0.73058	0.591919		1.8228	0.183202		-0.967877	0.580722
ENSCAFG00000001573	TMEM249	1.62117	0.0841827		1.13004	0.204167		4.31197	0.00334332
ENSCAFG00000001575	APOBEC2	-1.81318	NA		-2.01142	NA		2.28848	0.49497
ENSCAFG00000001576	AC233992.2	1.18819	0.000673173		0.982553	0.00124806		1.93195	0.000183636
ENSCAFG00000001577	CEP78	-0.0506996	0.922008		-0.0541823	0.907847		-0.247426	0.756771
ENSCAFG00000001578	OARD1	-0.639175	0.00904394		-0.679638	0.0136696		-0.412057	0.473886
ENSCAFG00000001579	GNAQ	-1.03245	0.0490621		-1.32499	0.00218992		-0.863742	0.304047
ENSCAFG00000001580	NFYA	-0.214005	0.623774		-0.0309134	0.931946		-0.964167	0.0635391
ENSCAFG00000001581	ADAMTSL1	-3.50568	2.11448e-08		-3.56519	1.50948e-08		-3.44606	0.000612372
ENSCAFG00000001582	LOC481790	-0.333804	0.432034		-0.417886	0.336215		-0.10733	0.919406
ENSCAFG00000001584	TREML1	0.995136	0.416813		-0.112538	0.921766		2.70583	0.0445955
ENSCAFG00000001585	FLNC	-7.10118	2.21989e-10		-6.54509	5.69319e-08		-9.0903	4.50026e-21
ENSCAFG00000001586	TREM2	2.38585	0.017229		1.54419	0.0810888		3.82205	0.00452324
ENSCAFG00000001588	SLC52A2	1.42172	0.000127009		1.33264	0.00114739		2.08246	1.06764e-06
ENSCAFG00000001589	TREML2	-1.53571	0.240095		-1.98188	0.194759		-1.08123	0.672891
ENSCAFG00000001590	SAXO1	0.413389	NA		0.412574	NA		0.544292	NA
ENSCAFG00000001591	TREM1	0.198424	0.871957		0.23511	0.858945		-0.132056	0.952514
ENSCAFG00000001592	ENSCAFG00000001592	0.580933	NA		0.412574	NA		1.27278	NA
ENSCAFG00000001593	NCR2	0.122424	NA		0.011587	NA		1.99004	NA
ENSCAFG00000001595	ADCK5	0.958436	0.0428373		0.62311	0.0223647		1.99188	0.00298361
ENSCAFG00000001596	FOXP4	0.703014	0.0925774		0.813614	0.0158456		0.217484	0.809427
ENSCAFG00000001597	MDFI	3.92723	3.93866e-08		4.16877	8.06138e-13		2.60668	0.0258926
ENSCAFG00000001598	HAUS6	0.00242786	0.997019		0.161094	0.756052		-0.750794	0.320464
ENSCAFG00000001599	TFEB	-1.17634	0.004017		-1.34144	0.000357236		-1.12512	0.123502
ENSCAFG00000001600	CPSF1	1.12288	0.00223545		0.933726	9.42274e-05		1.43397	0.0399498
ENSCAFG00000001601	PLIN2	1.14084	0.0482661		1.31592	0.012063		0.390058	0.751841
ENSCAFG00000001604	AL365205.1	0.10658	0.897286		-0.155823	0.828313		0.394326	0.711151
ENSCAFG00000001605	TOMM6	0.0373638	0.938317		-0.0401128	0.922033		0.622052	0.348983
ENSCAFG00000001606	ENSCAFG00000001606	0.503414	0.575598		0.601877	0.531017		0.267639	0.872124
ENSCAFG00000001607	SLC39A4	5.62173	2.53578e-08		4.8598	5.91627e-10		8.67286	6.23445e-12
ENSCAFG00000001608	ENSCAFG00000001608	1.73553	0.135107		1.86681	0.118634		1.61128	NA
ENSCAFG00000001609	USP49	-0.619134	0.383886		-1.00675	0.0205557		0.243272	0.848536
ENSCAFG00000001610	VPS28	1.47115	9.7272e-06		1.41513	3.73584e-05		1.74234	0.000523132
ENSCAFG00000001611	IRF5	0.134196	0.872483		-0.160401	0.833816		1.77991	0.0205561
ENSCAFG00000001612	DENND4C	0.00394028	0.995614		0.044152	0.935808		-0.0465359	0.965129
ENSCAFG00000001613	MED20	0.206769	0.749114		-0.0742661	0.856785		0.999237	0.300204
ENSCAFG00000001614	BYSL	0.314801	0.379529		0.290277	0.345763		0.312076	0.687501
ENSCAFG00000001615	RPS6	0.168378	0.702757		0.323103	0.3606		-0.418197	0.386786
ENSCAFG00000001616	KCP	0.329706	0.737823		0.0647036	0.95466		1.86355	0.0425305
ENSCAFG00000001617	VPS13A	-1.33663	6.46427e-06		-1.26214	5.53103e-05		-1.87848	2.58568e-06
ENSCAFG00000001618	CCND3	1.20911	0.0546324		1.02676	0.108877		3.00078	0.000211592
ENSCAFG00000001620	ATP6V1F	0.804445	0.0928982		0.571836	0.176721		2.03089	0.000283329
ENSCAFG00000001621	TONSL	1.67625	0.00105102		1.55415	0.000182797		2.15725	0.0346609
ENSCAFG00000001622	TAF8	0.491882	0.218916		0.281276	0.453347		1.50482	0.000202748
ENSCAFG00000001623	SLC24A2	1.46846	0.401875		1.21099	0.510246		4.23395	0.13063
ENSCAFG00000001624	CYHR1	0.623373	0.193134		0.331305	0.432526		1.51449	0.00485494
ENSCAFG00000001626	OPN1SW	-1.47795	0.499348		-1.99924	0.389497		-1.00364	NA
ENSCAFG00000001627	KIFC2	1.23242	0.193556		0.00706254	0.99359		2.66162	0.00223044
ENSCAFG00000001630	MYH9	0.231242	0.510081		0.297751	0.429017		0.0923407	0.912656
ENSCAFG00000001631	GUCA1A	-2.21246	0.178105		-2.27752	0.195945		0.0826756	NA
ENSCAFG00000001632	FOXH1	1.37018	0.193862		0.0964768	0.911688		3.32567	0.000462212
ENSCAFG00000001633	GUCA1B	0.16736	0.853102		0.101376	0.919132		0.508337	0.718417
ENSCAFG00000001634	ENSCAFG00000001634	0.40615	0.555128		0.661526	0.282077		-0.918811	0.387829
ENSCAFG00000001635	MLLT3	1.01085	0.0767905		0.99858	0.121062		1.5164	0.0031701
ENSCAFG00000001636	PPP1R16A	0.819337	0.33411		-0.00120611	0.998548		2.19849	0.0303782
ENSCAFG00000001638	MRPS10	-0.322172	0.455045		-0.100718	0.820555		-1.34494	0.000457644
ENSCAFG00000001640	CALU	-0.737309	0.0810364		-0.657142	0.173375		-1.30735	0.0233888
ENSCAFG00000001642	TRERF1	0.194357	0.852757		0.423455	0.631993		-1.00914	0.19542
ENSCAFG00000001644	FAM71F1	0.384063	NA		0.104439	NA		0.801685	NA
ENSCAFG00000001645	FAM71F2	2.01463	0.0015462		2.26177	0.00025182		0.792041	0.429811
ENSCAFG00000001646	PRUNE2	-8.36354	NA		-8.14909	NA		-9.38825	7.70599e-36
ENSCAFG00000001648	GPT	0.892878	0.418999		-0.327956	0.696751		2.38857	0.041764
ENSCAFG00000001649	GCNT1	-1.72508	0.0609091		-1.79013	0.0651054		-1.23648	NA
ENSCAFG00000001651	IMPDH1	0.184178	0.539899		0.121169	0.669364		0.19397	0.740926
ENSCAFG00000001652	HACD4	-0.098993	0.9148		0.0905278	0.92077		-0.811387	0.275895
ENSCAFG00000001653	IFNB1	1.05186	NA		1.23781	NA		0.256869	NA
ENSCAFG00000001655	MFSD3	0.456168	0.433889		0.219733	0.607423		1.20381	0.179714
ENSCAFG00000001660	LRRC14	0.671006	0.0331558		0.506954	0.033516		1.11643	0.0554613
ENSCAFG00000001667	RBM28	1.29779	0.000444495		1.2291	0.00125774		1.26443	0.07338
ENSCAFG00000001669	ARHGAP39	1.33803	0.000713953		1.19586	0.000779177		1.84653	0.00436566
ENSCAFG00000001671	MTAP	0.130929	0.818374		0.273181	0.55755		-0.365508	0.616688
ENSCAFG00000001672	LEP	-4.38727	0.0372245		-4.15795	0.0336744		-5.45297	0.0118388
ENSCAFG00000001673	COMMD5	0.847331	0.0422403		0.736508	0.104553		1.64161	0.00131427
ENSCAFG00000001675	CDKN2A	1.31036	0.081698		1.34292	0.0971123		2.77385	0.00131427
ENSCAFG00000001677	RPL8	0.94951	0.0215302		0.955627	0.0404786		1.2275	0.00208284
ENSCAFG00000001680	CDKN2B	-0.324967	0.747757		-0.606456	0.511548		2.03999	0.0549211
ENSCAFG00000001681	DMRTA1	1.33691	NA		0.980081	NA		1.97608	NA
ENSCAFG00000001685	ZNF16	0.293565	0.453425		0.149907	0.607423		0.760976	0.256935
ENSCAFG00000001686	C8orf33	0.371237	0.329803		0.375143	0.322594		0.245699	0.762859
ENSCAFG00000001688	ELAVL2	-4.647	0.0135013		-4.98286	0.0180929		-4.73887	0.0545912
ENSCAFG00000001689	LOC102156332	-1.05075	0.414695		-1.50806	0.133572		3.84523	0.00179552
ENSCAFG00000001690	PCSK5	-0.947523	0.227032		-1.08368	0.149862		-0.965052	0.445787
ENSCAFG00000001697	UBR2	-0.337596	0.271556		-0.251675	0.435005		-0.685547	0.0661386
ENSCAFG00000001698	PLAA	0.198106	0.528845		0.246197	0.395241		0.0295906	0.963823
ENSCAFG00000001699	OSTF1	1.06035	0.000327689		1.11614	0.000267987		1.2713	0.00891666
ENSCAFG00000001700	SND1	0.309654	0.32825		0.180346	0.572687		0.495192	0.320464
ENSCAFG00000001701	RBFOX2	-1.12648	0.000345015		-1.03883	0.00125649		-1.66283	0.00326145
ENSCAFG00000001702	NMRK1	-0.685781	0.104199		-0.687767	0.117848		-0.673471	0.430698
ENSCAFG00000001703	CARNMT1	-0.785468	0.0668169		-0.519288	0.134548		-2.03215	3.58022e-07
ENSCAFG00000001704	APOL6	0.55015	0.345941		0.425146	0.520273		1.02361	0.0128902
ENSCAFG00000001705	MB	-3.3615	0.0011513		-3.42012	0.00195528		0.926126	NA
ENSCAFG00000001706	IFT74	0.524992	0.33457		0.496438	0.419827		1.12328	0.0134888
ENSCAFG00000001709	MCM5	1.72948	0.0101711		1.9978	0.00360676		0.525486	NA
ENSCAFG00000001710	CHRNA3	0.659357	0.646928		0.363292	0.819021		1.08176	0.593899
ENSCAFG00000001711	HMOX1	2.09759	0.00295602		1.92247	0.0086849		3.18792	0.000357093
ENSCAFG00000001712	LRRC19	1.5884	0.015913		1.40036	0.0398645		2.56178	0.000377075
ENSCAFG00000001713	TEK	-1.34382	0.0276458		-1.21336	0.0602958		-1.80183	0.102782
ENSCAFG00000001714	ENSCAFG00000001714	-0.297729	0.830345		-0.888541	0.438394		1.61614	0.325007
ENSCAFG00000001715	MOB3B	0.395342	0.556755		0.601911	0.219429		-0.500632	0.586907
ENSCAFG00000001716	IFNK	0.364327	0.869582		0.39293	0.866224		0.816707	NA
ENSCAFG00000001717	TOM1	0.673243	0.0201073		0.654327	0.0258759		0.944556	0.060999
ENSCAFG00000001718	LRRC4	-5.51464	4.28394e-24		-5.33656	3.87097e-19		-6.44584	2.3225e-17
ENSCAFG00000001719	PAX4	1.07486	NA		1.30365	NA		-0.417483	NA
ENSCAFG00000001720	C9orf72	0.606338	0.216071		0.821604	0.0490856		-0.373458	0.563369
ENSCAFG00000001722	PRPH2	0.323169	0.79184		0.619728	0.553917		-1.09402	0.604655
ENSCAFG00000001723	TBCC	0.00509123	0.992518		-0.00789809	0.98233		0.104118	0.920796
ENSCAFG00000001725	BICRAL	-1.2991	0.0332568		-1.49547	0.000369639		-1.11093	NA
ENSCAFG00000001726	ARF5	0.459168	0.230083		0.345529	0.365147		0.958916	0.140177
ENSCAFG00000001727	LINGO2	-3.56137	0.0303952		-5.15203	5.7294e-06		-1.84028	0.391555
ENSCAFG00000001728	RPL7L1	0.0890736	0.842805		0.137351	0.653088		-0.162292	0.863359
ENSCAFG00000001730	GCC1	0.572073	0.0672056		0.476203	0.169507		0.946024	0.00632302
ENSCAFG00000001731	ENSCAFG00000001731	1.63776	0.402		1.62334	0.446173		2.04421	NA
ENSCAFG00000001732	HMGXB4	0.0969062	0.758914		0.0880031	0.811312		0.0209509	0.963823
ENSCAFG00000001733	ZNF800	0.159826	0.703618		0.133535	0.782894		0.19681	0.751623
ENSCAFG00000001736	CNPY3	0.262027	0.553882		0.156891	0.733616		1.14425	0.0223783
ENSCAFG00000001738	GRM8	0.299784	0.880155		0.0432899	0.985233		3.74106	0.124901
ENSCAFG00000001740	LARGE1	-0.974451	0.0222498		-0.780126	0.0562514		-1.88056	0.000134004
ENSCAFG00000001741	GNMT	1.92441	0.00400093		2.01953	0.00361306		2.11092	0.0793166
ENSCAFG00000001744	ENSCAFG00000001744	-1.98334	0.0848299		-2.37105	0.0791963		-1.60349	0.370349
ENSCAFG00000001745	CHRNA5	2.09847	0.120835		1.80732	0.198332		3.86573	0.00766738
ENSCAFG00000001747	ENSCAFG00000001747	1.29038	0.0685914		1.37683	0.0551144		0.921067	0.593366
ENSCAFG00000001748	PEX6	-0.102833	0.857539		-0.386499	0.263166		0.72236	0.346215
ENSCAFG00000001751	TRPM6	0.0890384	0.966099		-0.725349	0.695719		0.437398	0.879111
ENSCAFG00000001752	SYN3	-1.09677	0.433021		-1.47858	0.368389		-0.101352	NA
ENSCAFG00000001753	PPP2R5D	0.134677	0.73182		0.0932554	0.718032		0.39233	0.627737
ENSCAFG00000001754	POT1	0.0920485	0.847183		-0.0246767	0.962725		0.359457	0.528502
ENSCAFG00000001756	MEA1	0.197154	0.720025		0.0712276	0.882459		1.07631	0.186402
ENSCAFG00000001757	GPR37	-3.06578	0.0285073		-3.03787	0.0508609		-3.82263	0.0771156
ENSCAFG00000001758	FBXO7	-0.132996	0.649174		-0.134375	0.615729		-0.179504	0.797713
ENSCAFG00000001759	ENSCAFG00000001759	3.24559	8.86184e-10		3.34149	4.94698e-10		3.5927	9.64064e-05
ENSCAFG00000001760	LSM3	-0.0654131	0.95184		-0.0413696	0.971681		-0.108947	0.954318
ENSCAFG00000001762	TMEM229A	-3.42578	0.0280873		-4.36443	0.00164269		1.81745	0.366446
ENSCAFG00000001763	KLHDC3	0.384098	0.339059		0.175096	0.479756		1.04927	0.105657
ENSCAFG00000001765	SPAM1	0.768607	NA		-0.471201	NA		3.54079	NA
ENSCAFG00000001766	IREB2	1.07609	0.00110624		0.852827	0.000953286		1.48462	0.00130972
ENSCAFG00000001767	PWP1	-0.0767801	0.859304		0.00506774	0.992316		-0.575121	0.199296
ENSCAFG00000001768	HYAL4	1.10582	NA		0.97295	NA		1.26655	NA
ENSCAFG00000001769	RORB	-2.65822	0.0015397		-2.68452	0.00201116		-2.35414	0.105325
ENSCAFG00000001771	WASL	0.0753826	0.847655		-0.0550533	0.888743		0.547822	0.276858
ENSCAFG00000001772	ENSCAFG00000001772	1.15392	0.0597869		1.22262	0.0282012		1.2263	0.339786
ENSCAFG00000001773	ENSCAFG00000001773	0.650235	0.564454		0.575437	0.651556		1.00492	NA
ENSCAFG00000001774	CUL7	-0.423165	0.420178		-0.72924	0.0112062		0.409482	0.624148
ENSCAFG00000001775	LMOD2	0.856836	0.758176		-0.589369	NA		2.9078	0.309536
ENSCAFG00000001776	ENSCAFG00000001776	0.945736	0.319988		0.87943	0.411944		1.56651	0.271902
ENSCAFG00000001777	BPIFC	-1.08964	0.146094		-1.32651	0.11193		-0.389622	0.788996
ENSCAFG00000001778	ANXA1	1.80294	0.0483366		2.22102	1.28946e-05		-1.73071	0.12008
ENSCAFG00000001779	ASB15	0.393315	0.68673		0.41867	0.685449		0.539637	0.637528
ENSCAFG00000001781	WFS1	0.322504	0.637991		0.0520913	0.937092		0.518856	0.610177
ENSCAFG00000001782	MRPL2	-0.0331787	0.958155		-0.196028	0.561368		0.524148	0.61725
ENSCAFG00000001783	ENSCAFG00000001783	-0.0825648	0.909274		-0.286783	0.68079		0.0238503	0.98149
ENSCAFG00000001784	ZNF300	-0.87341	0.120602		-1.24433	0.00122889		-0.0369276	0.970307
ENSCAFG00000001785	RTCB	0.206952	0.44044		0.212187	0.459618		-0.0348229	0.946261
ENSCAFG00000001786	ACO1	-0.319363	0.141006		-0.2791	0.1134		-0.57474	0.246582
ENSCAFG00000001787	KLC4	-0.608888	0.309531		-0.958935	0.000874171		0.30644	0.798159
ENSCAFG00000001788	PRDM4	-0.45172	0.160549		-0.46225	0.190094		-0.66957	0.0987188
ENSCAFG00000001789	ENSCAFG00000001789	0.304655	0.731019		0.226133	0.827861		0.150835	0.88697
ENSCAFG00000001790	GRM3	1.56389	0.52346		1.19247	0.710605		3.0784	NA
ENSCAFG00000001791	ALDH1A1	2.02037	0.0104459		2.14382	0.00262764		2.14165	0.133968
ENSCAFG00000001792	LIMCH1	-3.56172	1.45599e-07		-3.22839	6.0642e-06		-5.01802	1.17029e-13
ENSCAFG00000001793	BTBD11	0.872909	0.255129		1.13367	0.00075147		-0.688709	0.599664
ENSCAFG00000001795	PHOX2B	-4.09472	0.392269		-3.95239	0.357736		-5.0584	NA
ENSCAFG00000001796	TMEM33	1.48647	6.24582e-07		1.49396	2.02532e-06		1.59365	0.0113215
ENSCAFG00000001797	CRY1	-0.191876	0.587505		-0.114428	0.775419		-0.677722	0.213052
ENSCAFG00000001798	SLC30A9	0.671194	0.0339703		0.626605	0.0768145		0.676271	0.0885937
ENSCAFG00000001799	MTERF2	-0.802896	0.00169348		-0.816972	0.00515151		-0.853928	0.176486
ENSCAFG00000001800	TMEM263	-0.332894	0.371135		-0.189686	0.596174		-0.927215	0.13092
ENSCAFG00000001802	BEND4	3.17504	0.00601872		3.60379	0.000182057		-0.598826	0.760772
ENSCAFG00000001804	SHISA3	-4.92863	9.24003e-09		-4.90157	8.76506e-08		-4.71898	0.00383671
ENSCAFG00000001805	RIC8B	-0.944029	0.00100288		-0.924951	0.00530572		-1.29365	0.000316908
ENSCAFG00000001807	DDX58	0.980618	0.256563		0.846754	0.375631		2.77788	7.30819e-08
ENSCAFG00000001808	KIAA1324L	0.541788	0.652593		-0.244538	0.827333		2.21617	0.0526562
ENSCAFG00000001809	TOPORS	-0.283611	0.27211		-0.19317	0.478674		-0.596814	0.0832242
ENSCAFG00000001810	TMEM215	-1.55288	0.338786		-1.68018	0.319594		1.00016	NA
ENSCAFG00000001811	ZFAND5	0.0521717	0.935162		0.310638	0.269884		-1.15271	0.107759
ENSCAFG00000001812	APTX	0.29114	0.49693		0.139342	0.769354		0.607609	0.192439
ENSCAFG00000001813	RFX4	-2.46795	0.106056		-2.28221	0.179976		-3.45477	NA
ENSCAFG00000001814	PTK7	0.554177	0.164477		0.611042	0.123926		0.618399	0.466938
ENSCAFG00000001815	GDA	-2.00684	0.000549812		-2.08605	0.000752463		-1.1319	0.132028
ENSCAFG00000001816	ATP8A1	1.93115	0.000183316		1.71563	0.000262769		3.32583	1.0766e-06
ENSCAFG00000001818	DNAJA1	1.34358	0.00125181		1.55581	5.38973e-05		0.401205	0.649269
ENSCAFG00000001819	DMTF1	-0.47787	0.28105		-0.577242	0.17312		-0.429584	0.507376
ENSCAFG00000001820	C9orf85	0.448238	0.247157		0.471388	0.19988		0.661277	0.346161
ENSCAFG00000001821	ABHD17B	0.606016	0.00712725		0.673827	0.000798503		0.514812	0.358642
ENSCAFG00000001825	TMEM2	0.994994	0.112347		1.00018	0.14254		0.847486	0.502159
ENSCAFG00000001827	CROT	-0.334172	0.587542		-0.511842	0.390053		0.374214	0.512834
ENSCAFG00000001828	KCTD8	-2.82912	0.308923		-3.08583	0.349931		4.27243	0.0739599
ENSCAFG00000001829	SRF	-2.43156	6.77092e-09		-2.47951	2.61443e-09		-2.84484	3.28654e-06
ENSCAFG00000001830	ENSCAFG00000001830	0.700345	0.575624		0.453531	0.759334		0.990659	0.588911
ENSCAFG00000001833	ABCB4	-3.77588	3.96288e-06		-4.10066	1.02094e-06		-3.97528	2.2296e-05
ENSCAFG00000001834	CUL9	0.152118	0.793452		-0.158615	0.629309		0.997776	0.15201
ENSCAFG00000001835	ABCB1	-0.0387041	0.974886		0.894467	0.489534		-0.232577	0.880986
ENSCAFG00000001836	SMU1	0.207166	0.421898		0.298166	0.102565		-0.103602	0.86391
ENSCAFG00000001837	DNPH1	1.97319	0.00171969		2.14189	0.000577453		1.18588	0.35566
ENSCAFG00000001838	RUNDC3B	-0.501754	0.621707		-0.711013	0.401		0.40166	0.80701
ENSCAFG00000001839	TTBK1	-0.45949	0.715738		-0.398904	0.719275		-0.714175	0.766058
ENSCAFG00000001840	B4GALT1	1.79045	0.000239953		1.96735	3.31422e-06		1.23426	0.117481
ENSCAFG00000001841	SLC25A40	-1.05646	0.0124641		-1.30609	8.39277e-05		-0.452247	0.572416
ENSCAFG00000001842	CRIP3	-1.19818	0.487325		-1.56215	0.458061		1.09089	0.580217
ENSCAFG00000001843	SPINK4	2.14094	0.0235038		2.5168	0.000747577		-0.925528	0.301663
ENSCAFG00000001844	BAG1	1.92142	0.0017367		2.21827	2.47321e-08		-0.00521414	0.994676
ENSCAFG00000001845	DBF4	0.431649	0.195148		0.381694	0.195642		0.730802	0.271743
ENSCAFG00000001846	CHMP5	1.17803	0.000430876		1.33832	2.59161e-06		0.630241	0.0868593
ENSCAFG00000001847	ZNF318	-0.699401	0.0982919		-0.578228	0.0971299		-1.28261	0.0768894
ENSCAFG00000001848	NFX1	0.153075	0.69535		0.272907	0.417837		-0.403743	0.43251
ENSCAFG00000001849	TRPM3	-6.283	2.84207e-11		-6.73468	7.29031e-12		-6.36749	5.19166e-07
ENSCAFG00000001850	GUF1	-0.367776	0.44044		-0.469066	0.290438		-0.494181	0.488997
ENSCAFG00000001851	POLR3B	-0.22735	0.450957		-0.095337	0.760577		-0.866749	0.0068986
ENSCAFG00000001852	ADAM22	-3.38635	3.23793e-06		-3.43466	9.66011e-06		-0.434713	NA
ENSCAFG00000001853	ABCC10	0.316904	0.530119		0.121566	0.813147		0.799566	0.321788
ENSCAFG00000001854	AL845331.2	1.28299	0.1412		1.32453	0.171177		2.43417	0.109467
ENSCAFG00000001855	SRI	0.0556368	0.877637		0.0888974	0.820379		-0.082346	0.856222
ENSCAFG00000001856	STEAP4	-0.196315	0.900946		-1.7189	0.0506172		1.17371	0.415848
ENSCAFG00000001857	ENSCAFG00000001857	-0.649564	0.473044		-0.442838	0.64864		-1.79445	0.14528
ENSCAFG00000001858	DLK2	0.200074	0.744841		-0.00186427	0.997717		1.16135	0.161088
ENSCAFG00000001861	ENSCAFG00000001861	0.152254	0.899845		0.119389	0.933781		0.33916	0.825225
ENSCAFG00000001862	ZNF804B	-0.599648	0.717941		-1.69504	0.18977		1.91631	0.167842
ENSCAFG00000001865	TJAP1	-0.571188	0.0683217		-0.725646	0.000419061		-0.3278	0.634568
ENSCAFG00000001866	STEAP1	-1.97452	0.0653308		-3.09966	2.33749e-05		-0.589683	0.711395
ENSCAFG00000001867	KLF9	-3.89333	4.20576e-15		-3.61884	1.46118e-13		-5.14399	4.73437e-17
ENSCAFG00000001868	YIPF3	0.452635	0.32349		0.386628	0.291951		1.06028	0.183113
ENSCAFG00000001869	NOL6	-0.026597	0.956031		-0.0312215	0.954456		-0.274028	0.7182
ENSCAFG00000001870	STEAP2	-4.14049	7.10567e-08		-4.61905	6.24143e-09		-3.91624	6.59972e-08
ENSCAFG00000001871	GNPDA2	0.390574	0.467109		0.0469052	0.925586		1.19867	0.0355049
ENSCAFG00000001872	POLR1C	0.0372753	0.948413		-0.206095	0.45686		0.589944	0.465949
ENSCAFG00000001873	TCP11L2	-0.644173	0.144798		-0.572172	0.207307		-0.608801	0.486012
ENSCAFG00000001874	CFAP69	-1.53372	0.107421		-2.60102	1.51635e-05		0.0672163	0.960788
ENSCAFG00000001875	CKAP4	-0.0249843	0.971292		0.034203	0.964551		-0.385266	NA
ENSCAFG00000001877	ENSCAFG00000001877	-1.70259	0.0198065		-1.99122	0.0173241		-1.39885	0.208135
ENSCAFG00000001878	GABRG1	-1.07883	NA		-0.999132	NA		-1.13883	NA
ENSCAFG00000001879	NUAK1	-1.47305	4.84454e-05		-1.68412	9.65949e-10		-1.07529	0.131334
ENSCAFG00000001880	SMC5	-1.12152	4.72382e-05		-1.04544	0.000360583		-1.63437	8.89525e-06
ENSCAFG00000001882	GTPBP10	0.416766	0.283977		0.166813	0.641803		1.06192	0.00233209
ENSCAFG00000001883	GABRA1	-2.13337	0.407187		-3.01064	0.241929		-0.783375	0.854219
ENSCAFG00000001884	CLDN12	0.696072	0.0425897		0.678807	0.0703913		0.738296	0.14663
ENSCAFG00000001885	APPL2	0.0328751	0.956361		0.216071	0.62464		-0.756966	0.222194
ENSCAFG00000001886	ENSCAFG00000001886	0.555265	0.214283		0.68487	0.110992		-0.116413	0.892747
ENSCAFG00000001889	GABRB1	2.84651	0.21519		-0.653391	NA		4.84721	0.000969847
ENSCAFG00000001890	MAMDC2	-3.00504	0.000756643		-2.9892	0.000109009		-2.55575	0.092385
ENSCAFG00000001891	UBAP2	0.295401	0.211457		0.367559	0.0977358		0.0925915	0.859044
ENSCAFG00000001892	XPO5	0.135535	0.756059		0.119737	0.664395		0.142818	0.880472
ENSCAFG00000001893	C9orf135	-1.30196	0.517188		-3.20437	NA		0.0596163	0.976935
ENSCAFG00000001894	WASHC4	-0.613633	0.118786		-0.556534	0.191805		-1.03807	0.0287924
ENSCAFG00000001895	PTAR1	-1.11826	0.00271631		-1.04387	0.00618833		-1.51239	0.00758671
ENSCAFG00000001897	APBA1	-2.67253	1.03416e-07		-3.24453	1.84789e-37		-1.16568	0.0309775
ENSCAFG00000001898	CDK14	-3.6318	8.42816e-12		-3.64137	4.22714e-11		-4.06318	4.98028e-09
ENSCAFG00000001899	COMMD8	1.39063	0.000129062		1.46517	0.000220671		1.24184	0.00239367
ENSCAFG00000001900	FAM189A2	-0.574726	0.549559		-0.570182	0.538		-0.270978	0.854408
ENSCAFG00000001901	DCAF12	0.643655	0.0328682		0.649318	0.0507155		1.03186	0.0321658
ENSCAFG00000001902	TJP2	1.64463	2.79107e-05		1.69796	0.000123489		2.05931	0.000563068
ENSCAFG00000001903	ATP10D	1.77642	7.68157e-05		1.83429	0.000360061		1.99474	0.00158004
ENSCAFG00000001905	UBAP1	-0.111215	0.729953		-0.0477567	0.897185		-0.409757	0.287121
ENSCAFG00000001906	FZD1	-2.40739	4.05864e-05		-2.81521	1.59617e-07		-1.46519	0.0331227
ENSCAFG00000001907	CORIN	3.07935	0.0370693		2.94436	0.0571481		3.59407	NA
ENSCAFG00000001908	MTERF1	0.497156	0.412997		0.0318572	0.956762		1.63936	0.00318478
ENSCAFG00000001909	KIF24	0.667229	0.364139		1.0094	0.0750242		-1.17776	0.256334
ENSCAFG00000001910	POLH	0.471474	0.239543		0.459639	0.127019		0.576402	0.516696
ENSCAFG00000001911	ALDH1L2	-3.57982	1.91785e-08		-3.46991	1.64393e-09		-4.24739	4.18637e-05
ENSCAFG00000001913	NFXL1	1.13051	0.000380642		1.04511	4.0663e-05		1.40984	0.0210668
ENSCAFG00000001915	C9orf24	-1.53131	NA		-2.07445	NA		-0.901595	NA
ENSCAFG00000001916	PIP5K1B	-1.37309	0.0446765		-1.90341	0.00283145		-0.885296	0.25447
ENSCAFG00000001917	CNGA1	2.96508	0.00266016		2.60766	0.00802545		5.95574	1.76547e-07
ENSCAFG00000001918	GTPBP2	0.0443836	0.898279		0.0396457	0.919055		1.29598	0.141571
ENSCAFG00000001919	FAM219A	-1.03372	0.109064		-1.27714	0.0388442		-0.881745	0.259152
ENSCAFG00000001921	RPP25L	0.170776	0.730489		0.089252	0.857612		0.904314	0.194849
ENSCAFG00000001922	MAD2L1BP	0.410879	0.439168		0.147237	0.52559		1.38767	0.105738
ENSCAFG00000001923	DNAI1	-3.10126	0.045701		-3.19901	0.062109		-1.20646	0.662201
ENSCAFG00000001924	RSPH9	-1.25834	0.147044		-1.92112	0.00459179		-0.633847	0.680266
ENSCAFG00000001925	C12orf45	0.0749875	0.84299		0.172815	0.590346		-0.330158	0.55036
ENSCAFG00000001926	FAM122A	0.130989	0.804337		-0.0949927	0.846657		1.10787	0.021552
ENSCAFG00000001927	TMEM252	-6.57561	2.26744e-11		-6.85045	2.78384e-10		-6.70266	9.59177e-07
ENSCAFG00000001928	MRPS18A	0.532159	0.0967812		0.466632	0.122567		0.858052	0.108434
ENSCAFG00000001929	SLC41A2	-1.41181	0.0209696		-1.29157	0.0551718		-1.91026	0.0737414
ENSCAFG00000001930	PGM5	-8.12408	3.49829e-46		-7.91632	1.07116e-36		-9.13268	3.43217e-36
ENSCAFG00000001932	CNTFR	-6.56125	1.21499e-19		-6.94182	2.58239e-20		-6.58125	1.56809e-10
ENSCAFG00000001935	AKAP9	0.579176	0.274095		0.210485	0.64855		1.63363	0.000128867
ENSCAFG00000001937	DCTN3	-0.204941	0.599527		-0.241515	0.410283		-0.0342216	0.969512
ENSCAFG00000001938	VEGFA	0.512496	0.391301		0.839947	0.111239		-0.902169	0.0748071
ENSCAFG00000001941	TMEM63B	0.896539	3.77894e-05		0.860291	5.1654e-05		1.08247	0.0126181
ENSCAFG00000001942	TEC	1.69308	0.00301349		1.78385	0.000941482		1.69703	0.125716
ENSCAFG00000001943	CBWD2	0.100146	0.847183		0.0264971	0.957891		0.556883	0.477229
ENSCAFG00000001944	TXNRD1	1.29781	0.0260453		1.43481	0.0223606		0.901391	0.171627
ENSCAFG00000001945	CYP51A1	2.09436	6.98823e-07		1.85615	4.14892e-09		2.9416	0.000197449
ENSCAFG00000001946	GALT	0.262419	0.743936		-0.132272	0.824439		2.08208	0.0075956
ENSCAFG00000001947	LRRD1	-0.353525	0.851701		-0.470533	NA		-0.127599	NA
ENSCAFG00000001949	ENSCAFG00000001949	1.78841	0.180094		1.89044	0.165186		1.67699	NA
ENSCAFG00000001951	IL11RA	-2.06745	2.20136e-07		-2.22907	6.85983e-10		-1.55822	0.0406385
ENSCAFG00000001952	SEPT10	-0.385168	0.500588		-0.1267	0.800011		-1.63122	0.000820042
ENSCAFG00000001953	CCL27	-2.07435	0.000736308		-2.102	0.0025728		-2.36523	0.0136481
ENSCAFG00000001954	CCL19	-2.73272	0.0919144		-2.83319	0.107671		-2.81909	0.29676
ENSCAFG00000001956	SLAIN2	-0.624287	0.110107		-0.442268	0.243468		-1.4834	0.00232854
ENSCAFG00000001957	DOCK8	-0.252161	0.814792		-0.470512	0.606864		1.94145	0.112943
ENSCAFG00000001959	ENSCAFG00000001959	0.798252	0.221508		0.759842	0.272548		0.203099	0.877657
ENSCAFG00000001960	CAPN11	-0.756784	0.549844		-1.63421	0.0565454		2.52825	0.00452868
ENSCAFG00000001961	KRIT1	-0.028749	0.937264		-0.153197	0.577619		0.32954	0.417899
ENSCAFG00000001962	PHF24	-1.77544	0.0978536		-2.29256	0.0116564		-1.3671	0.469616
ENSCAFG00000001964	SLC10A4	-1.36323	NA		-1.09962	NA		-2.51175	NA
ENSCAFG00000001965	DNAJB5	-5.26211	6.75268e-17		-5.14118	8.73209e-14		-6.07113	1.07231e-26
ENSCAFG00000001966	SH3RF3	-1.26772	7.14983e-05		-1.11254	0.000734157		-1.99126	6.1707e-12
ENSCAFG00000001967	C9orf131	-0.788038	0.398788		-0.958834	0.302159		-1.04677	0.323204
ENSCAFG00000001968	ENSCAFG00000001968	0.139262	0.929087		0.109168	0.949881		0.40255	0.818202
ENSCAFG00000001969	ANKIB1	0.153112	0.762365		-0.112989	0.807788		0.626036	0.0817851
ENSCAFG00000001970	EDAR	-4.13596	0.00116255		-4.95977	NA		-2.6186	NA
ENSCAFG00000001972	FRYL	-0.370834	0.474302		-0.424378	0.415311		-0.613519	0.334684
ENSCAFG00000001974	KANK1	-3.02	1.24432e-05		-2.64583	0.000270915		-4.58477	5.60608e-16
ENSCAFG00000001976	VCP	0.0872575	0.857213		0.295824	0.383843		-0.847617	0.0327827
ENSCAFG00000001977	PEX1	0.639927	0.125034		0.36433	0.309179		1.61542	1.07557e-06
ENSCAFG00000001978	CCDC138	-0.567493	0.0830886		-0.643703	0.0617202		-0.104338	0.879975
ENSCAFG00000001980	RBM48	0.20948	0.633361		0.0179585	0.96976		1.14303	0.0283142
ENSCAFG00000001981	HSP90AB1	0.471955	0.0935864		0.621969	0.0055524		-0.198831	0.703895
ENSCAFG00000001982	DMRT1	-0.415453	0.902027		-1.87172	NA		2.43286	0.455937
ENSCAFG00000001983	SLC35B2	0.595845	0.0146608		0.669427	0.00758027		0.461791	0.256192
ENSCAFG00000001985	NFKBIE	0.466306	0.312517		0.372126	0.437848		0.719705	0.388065
ENSCAFG00000001986	TMEM151B	-0.175947	0.871639		-1.31922	0.0377216		0.778668	0.404256
ENSCAFG00000001987	TCTE1	0.62214	0.846597		-0.422386	NA		3.45768	NA
ENSCAFG00000001988	DMRT2	2.45887	0.104635		2.24531	0.18783		2.78233	0.217703
ENSCAFG00000001989	AARS2	-0.135376	0.737816		-0.225888	0.531981		-0.123176	0.868937
ENSCAFG00000001990	OCIAD1	0.575958	0.0566961		0.431048	0.142876		0.981379	0.0304437
ENSCAFG00000001991	ENSCAFG00000001991	-2.98574	0.0222897		-2.81344	0.074939		-3.78163	0.0282942
ENSCAFG00000001995	FANCG	0.522565	0.00953208		0.49978	0.0186863		0.626413	0.152051
ENSCAFG00000001996	CDC5L	-0.135228	0.664952		0.00334683	0.990673		-0.624452	0.0721873
ENSCAFG00000001997	CWH43	4.68978	NA		4.5998	NA		2.46052	NA
ENSCAFG00000001998	CDK6	1.56986	0.00144999		1.37866	0.00667741		2.37017	0.000385556
ENSCAFG00000001999	DCUN1D4	-0.172943	0.698517		-0.286055	0.458146		-0.153618	0.827954
ENSCAFG00000002000	PIGO	-0.434305	0.141083		-0.351452	0.240123		-0.886342	0.105795
ENSCAFG00000002001	SGCB	-0.937845	0.0514315		-0.820346	0.08403		-1.5791	0.0358193
ENSCAFG00000002002	SUPT3H	-0.319056	0.394491		-0.216407	0.537401		-0.674467	0.280027
ENSCAFG00000002006	SPATA18	0.376871	NA		0.154561	NA		1.20963	NA
ENSCAFG00000002007	SAMD9L	1.41435	0.0479808		1.24628	0.102607		2.82321	5.5321e-05
ENSCAFG00000002008	ENSCAFG00000002008	2.02143	0.000845323		2.04842	0.0022786		2.48681	0.00722054
ENSCAFG00000002010	HIGD2A	-0.31481	NA		-0.749131	NA		-0.295358	NA
ENSCAFG00000002011	HEPACAM2	3.0123	0.0225479		3.92106	0.019618		4.90876	0.000618057
ENSCAFG00000002013	SMARCA2	-0.603166	0.0185483		-0.55988	0.0452078		-0.636222	0.201552
ENSCAFG00000002014	USP46	2.20929	2.80203e-07		2.13066	2.20263e-06		2.90037	5.51286e-05
ENSCAFG00000002015	LIMS1	-0.660798	0.0400646		-0.526038	0.115421		-1.3203	4.63235e-05
ENSCAFG00000002016	CLIC5	-5.81426	6.49076e-16		-5.69972	7.72234e-15		-6.45857	8.90561e-13
ENSCAFG00000002017	FAM214B	-0.485543	0.328678		-0.548581	0.266412		-0.382471	0.622384
ENSCAFG00000002018	VPS50	0.631855	0.0778152		0.464685	0.149512		1.28827	0.0107535
ENSCAFG00000002019	RASL11B	-0.477817	0.40551		-0.532658	0.364955		-0.0469722	0.952851
ENSCAFG00000002020	ENPP4	0.188689	0.829672		0.162378	0.863294		1.00965	0.20545
ENSCAFG00000002021	ENPP5	-0.201439	0.857085		-0.398347	0.710493		2.69048	0.00528736
ENSCAFG00000002023	RCAN2	-0.582731	0.589025		-0.581707	0.591586		-0.547816	0.714354
ENSCAFG00000002024	ENSCAFG00000002024	1.10691	0.535273		0.979842	0.586909		1.82656	NA
ENSCAFG00000002025	GCC2	0.806213	0.0550367		0.675568	0.142876		1.42987	0.000825267
ENSCAFG00000002026	CYP39A1	-0.498451	0.394376		-0.454213	0.496216		-0.0398962	0.966544
ENSCAFG00000002028	VLDLR	0.259886	0.767061		0.0225424	0.982697		1.68442	0.057648
ENSCAFG00000002029	SLC25A27	-0.995851	0.106056		-0.894605	0.175352		-1.52434	0.0768738
ENSCAFG00000002030	UNC13B	-0.461258	0.436284		-0.277361	0.607423		-1.29236	0.133999
ENSCAFG00000002031	SCFD2	1.04094	0.00290543		0.903145	0.00509275		1.60687	0.00172976
ENSCAFG00000002032	KCNV2	-0.53598	NA		-0.679935	NA		-0.417483	NA
ENSCAFG00000002033	CALCR	0.969971	NA		0.837148	NA		0.722138	NA
ENSCAFG00000002034	FIP1L1	1.13444	0.000313729		0.988071	0.00085431		1.89744	1.84864e-06
ENSCAFG00000002035	PUM3	0.384959	0.248041		0.51466	0.071846		-0.116981	0.873814
ENSCAFG00000002036	TDRD6	-0.230265	0.747201		0.84844	0.382381		-1.0341	0.213902
ENSCAFG00000002037	PLA2G7	0.0499415	0.953843		1.09364	0.233857		-0.886589	0.298276
ENSCAFG00000002038	ENSCAFG00000002038	-0.377687	0.779657		-0.430168	0.757846		-0.8205	NA
ENSCAFG00000002039	LNX1	1.98534	0.00162209		1.65372	0.00424309		4.25436	2.68753e-12
ENSCAFG00000002040	TFPI2	-2.60797	0.00247088		-2.52838	0.00160508		-2.80601	0.0467696
ENSCAFG00000002041	SULT1C2	0.881184	NA		0.160456	NA		2.41473	NA
ENSCAFG00000002042	ENSCAFG00000002042	-2.62925	0.0750663		-3.82146	1.73167e-05		0.230442	0.91983
ENSCAFG00000002043	MEP1A	1.28605	NA		1.54336	NA		0.544292	NA
ENSCAFG00000002044	GNGT1	-1.19973	NA		-1.21311	NA		-1.13883	NA
ENSCAFG00000002045	LOC611901	0.610137	NA		0.448813	NA		0.59038	NA
ENSCAFG00000002046	GNG11	-2.99275	0.000128393		-2.7272	0.000332719		-4.38233	3.60264e-06
ENSCAFG00000002049	RUSC2	-3.90296	3.01504e-17		-3.71864	2.75459e-16		-4.74902	1.12392e-14
ENSCAFG00000002050	CHIC2	1.62973	3.81952e-08		1.68042	5.2946e-08		1.53322	0.00271133
ENSCAFG00000002052	GSX2	3.56285	0.112338		3.6448	0.128121		2.85246	NA
ENSCAFG00000002053	RFX3	0.0185753	0.977211		0.0550682	0.926669		-0.234873	0.814967
ENSCAFG00000002054	ADGRF5	-0.37207	0.552267		-0.351541	0.555262		-0.102681	0.938974
ENSCAFG00000002055	FAM166B	-3.79046	5.34275e-10		-3.62992	3.6555e-08		-4.42003	2.03894e-05
ENSCAFG00000002057	PDGFRA	1.81719	0.00191185		1.98249	0.000211434		1.31172	0.249255
ENSCAFG00000002058	TESK1	-0.636226	0.043019		-0.544722	0.118225		-1.17123	0.0183063
ENSCAFG00000002061	CD72	-1.59918	0.0811397		-1.771	0.0781755		-0.134059	0.943999
ENSCAFG00000002063	SIT1	-1.75626	0.0909943		-2.54394	0.00409431		1.10614	0.408109
ENSCAFG00000002064	SLC5A7	-6.39724	NA		-9.55284	NA		-6.04055	NA
ENSCAFG00000002065	KIT	-0.344505	0.689808		-0.446024	0.625579		0.290561	0.847378
ENSCAFG00000002066	CCDC107	-0.0629499	0.913289		-0.0599438	0.923564		-0.0305368	0.976177
ENSCAFG00000002067	SLC1A1	0.558588	0.548916		0.473573	0.634026		2.25801	0.0393079
ENSCAFG00000002068	ADGRF1	5.27822	4.42273e-12		5.51093	7.72609e-22		3.88739	0.000469542
ENSCAFG00000002069	COL1A2	-3.42241	9.36902e-06		-3.50259	7.26017e-08		-3.34839	0.0289597
ENSCAFG00000002070	FAM32A	-0.255396	0.655415		-0.213955	0.731417		-0.635655	0.572416
ENSCAFG00000002071	ENSCAFG00000002071	1.24049	0.174116		1.56206	0.0667471		-0.387356	0.836147
ENSCAFG00000002072	SPATA6L	0.266518	0.520083		0.224419	0.632643		0.456798	0.529419
ENSCAFG00000002073	ARHGEF39	0.327104	0.632328		0.543655	0.379786		-0.673242	0.521544
ENSCAFG00000002074	ENSCAFG00000002074	1.8895	0.0978926		2.07015	0.0719133		1.00239	NA
ENSCAFG00000002075	PLPP6	0.646442	0.0568108		0.587011	0.117759		1.09255	0.0376288
ENSCAFG00000002077	CA9	-4.23621	5.03468e-09		-4.43371	2.00465e-09		-4.59399	1.80649e-07
ENSCAFG00000002078	TNFRSF21	1.32291	0.00472049		1.37638	0.000623686		1.71423	0.0474505
ENSCAFG00000002079	KDR	-1.40024	0.0349386		-0.999206	0.0790389		-3.41196	1.13056e-08
ENSCAFG00000002080	ST6GAL2	0.492982	0.80132		0.738314	0.661749		-2.56111	0.200289
ENSCAFG00000002081	CDC37L1	-0.351495	0.173623		-0.344202	0.181329		-0.0943725	0.88896
ENSCAFG00000002083	AK3	0.658423	0.071864		0.57369	0.141699		1.25924	0.00493619
ENSCAFG00000002084	ENSCAFG00000002084	0.144898	0.84212		0.322341	0.58645		-0.665113	0.502135
ENSCAFG00000002085	SNRPE	1.35786	0.046899		1.15979	0.0814782		2.66933	0.0554647
ENSCAFG00000002086	TPM2	-7.61597	NA		-7.79743	NA		-7.99764	3.0541e-25
ENSCAFG00000002087	ENSCAFG00000002087	-0.902656	NA		-0.789482	NA		-1.93165	NA
ENSCAFG00000002089	CD2AP	0.92583	0.0584711		0.988068	0.0224362		0.91331	0.333955
ENSCAFG00000002090	SRD5A3	0.504546	0.176797		0.436277	0.251461		1.2154	0.0114084
ENSCAFG00000002091	RCL1	0.0681007	0.871982		-0.00094206	0.998138		0.549998	0.412489
ENSCAFG00000002092	ADGRF2	1.46272	NA		1.85174	NA		-0.177057	NA
ENSCAFG00000002093	CASD1	-0.379476	0.479863		-0.642043	0.194573		0.0987632	0.794135
ENSCAFG00000002094	TMEM165	-0.137085	0.784246		-0.0405915	0.943887		-0.656081	0.354639
ENSCAFG00000002095	ADGRF4	2.89739	0.00510586		2.8077	0.00239421		5.30742	0.00340496
ENSCAFG00000002096	UXS1	1.56315	4.35644e-05		1.65605	1.03446e-07		1.35189	0.0938661
ENSCAFG00000002098	C2orf40	-1.9809	0.125248		-1.75161	0.168477		-3.05554	0.0598897
ENSCAFG00000002099	NCK2	-0.370441	0.18053		-0.357663	0.243081		-0.511456	0.319948
ENSCAFG00000002100	PTCHD4	-1.43768	NA		-1.16535	NA		-1.99253	NA
ENSCAFG00000002101	ENSCAFG00000002101	0.0590111	0.956961		0.196756	0.837218		-0.427248	0.755401
ENSCAFG00000002102	JAK2	-0.456921	0.241402		-0.395144	0.357934		-0.708428	0.226587
ENSCAFG00000002104	SGCE	-3.90949	2.8458e-29		-4.07307	1.32445e-27		-3.52952	5.02342e-12
ENSCAFG00000002105	FHL2	1.45463	0.184963		1.95177	0.00101583		-3.67773	3.09174e-08
ENSCAFG00000002106	LOC610048	1.00337	0.00114309		0.995512	0.00506921		0.976738	0.0338746
ENSCAFG00000002110	PPP1R9A	-0.111131	0.919451		-0.681174	0.411618		0.44827	0.639858
ENSCAFG00000002111	MUT	-0.442722	0.049923		-0.373327	0.129313		-0.77786	0.0873157
ENSCAFG00000002112	TGFBRAP1	0.0906012	0.699721		0.0935452	0.721811		0.0782034	0.864471
ENSCAFG00000002113	INSL6	0.109639	0.959173		-0.451123	0.83911		3.72068	0.00969468
ENSCAFG00000002114	PON1	0.112452	NA		-0.821924	NA		2.93574	NA
ENSCAFG00000002115	RLN1	-1.29486	0.297836		-1.15887	0.395362		6.07539	NA
ENSCAFG00000002116	PLGRKT	0.613523	0.192603		0.520209	0.204406		1.21436	0.139919
ENSCAFG00000002117	C2orf49	-0.569314	0.0777567		-0.702001	0.00781508		-0.257062	0.733959
ENSCAFG00000002118	PON3	-0.122526	0.942681		-0.453209	0.756146		3.3456	0.0168747
ENSCAFG00000002119	GPR45	-0.4674	0.854646		-0.251231	0.935029		-1.55486	0.627737
ENSCAFG00000002120	CD274	-1.59371	0.0808887		-2.57398	NA		-0.433878	0.764343
ENSCAFG00000002121	PDCD1LG2	-0.282888	0.772843		-0.652547	0.437742		1.47326	0.254753
ENSCAFG00000002122	MRPS9	-0.320001	0.377115		-0.297485	0.447057		-0.541552	0.380694
ENSCAFG00000002123	PON2	0.335236	0.684785		0.149538	0.863052		2.36326	0.0052461
ENSCAFG00000002124	ASB4	-2.38482	NA		-2.55901	NA		-1.79097	NA
ENSCAFG00000002126	CENPQ	-0.157425	0.72575		0.0159308	0.97079		-0.918687	0.0982703
ENSCAFG00000002127	GLYATL3	-0.603367	0.796349		-0.460318	0.844049		-1.12712	NA
ENSCAFG00000002128	RIC1	-0.283327	0.242139		-0.242587	0.384864		-0.544182	0.0621868
ENSCAFG00000002129	PDK4	-3.01615	8.71369e-06		-2.60339	0.000156706		-4.70614	1.27378e-09
ENSCAFG00000002130	SLC9A2	1.76084	0.0168204		1.29773	0.0408342		3.86133	5.75124e-06
ENSCAFG00000002131	ERMP1	1.92473	0.000212955		1.98315	0.000170164		2.30547	0.0130915
ENSCAFG00000002132	ENSCAFG00000002132	1.48955	0.339927		1.54101	0.340226		1.83159	NA
ENSCAFG00000002133	LOC610105	1.26211	NA		1.69725	NA		-1.13882	NA
ENSCAFG00000002134	IL18RAP	-1.96374	0.0917438		-2.24911	NA		-1.90171	NA
ENSCAFG00000002138	IL18R1	0.050882	0.970361		-0.0554766	0.969718		0.442141	NA
ENSCAFG00000002139	ENSCAFG00000002139	1.2878	0.00499098		1.45074	0.00132226		0.69816	0.428047
ENSCAFG00000002140	CLOCK	-0.50903	0.558005		-1.07947	0.0774226		0.0443813	0.973804
ENSCAFG00000002141	RHAG	2.82671	NA		3.25839	0.118062		-0.417483	NA
ENSCAFG00000002142	IL1RL1	3.48169	0.000647568		3.91069	1.24367e-05		0.184378	0.928593
ENSCAFG00000002143	DYNC1I1	-5.69363	4.34983e-18		-5.72053	3.06034e-15		-6.27333	4.76656e-14
ENSCAFG00000002145	IL1RL2	1.08579	0.297836		0.492232	0.657559		1.72117	0.244809
ENSCAFG00000002147	IL1R1	-2.6122	0.000216189		-2.32783	0.000896083		-3.89064	0.000618679
ENSCAFG00000002152	IL1R2	-2.2002	NA		-1.79792	0.165616		-4.35055	NA
ENSCAFG00000002153	TFAP2D	0.413389	NA		NA	NA		1.88474	NA
ENSCAFG00000002154	TLN1	-2.60105	3.67387e-11		-2.45879	5.44193e-09		-3.42031	6.39604e-12
ENSCAFG00000002155	BX088645.1	-2.9055	0.0563513		-3.2144	0.0483818		-2.68131	0.252926
ENSCAFG00000002156	TFAP2B	3.60551	1.35426e-07		3.59981	3.0999e-06		4.73388	2.13448e-06
ENSCAFG00000002158	LOC102153005	1.21404	NA		0.412574	NA		2.89676	NA
ENSCAFG00000002159	LOC484191	1.86196	0.438593		-1.13821	0.695172		5.185	0.000113888
ENSCAFG00000002160	SPTLC1	0.385965	0.129993		0.324997	0.167776		0.546434	0.286443
ENSCAFG00000002161	SLC25A13	0.272895	0.583741		0.313084	0.549705		-0.217708	0.809522
ENSCAFG00000002162	MAP4K4	0.163395	0.757508		0.184975	0.719273		-0.0808287	0.931954
ENSCAFG00000002163	ROR2	-6.12585	9.47226e-22		-6.60071	4.54698e-23		-6.15516	6.90101e-19
ENSCAFG00000002164	PDCL2	0.841549	NA		0.44059	NA		1.85927	NA
ENSCAFG00000002165	PKHD1	1.29322	0.177119		0.977532	0.293713		3.3638	0.00923213
ENSCAFG00000002166	ENSCAFG00000002166	0.399415	0.467652		0.454294	0.438181		0.201262	0.799929
ENSCAFG00000002169	NFIL3	-1.63926	0.00138483		-1.39826	0.0137223		-2.72562	5.07628e-06
ENSCAFG00000002171	SYK	0.84412	0.322693		0.449619	0.60138		2.31471	NA
ENSCAFG00000002172	DIRAS2	-1.55248	0.270797		-1.53095	0.305404		-1.60407	NA
ENSCAFG00000002173	ENSCAFG00000002173	2.31546	0.135712		1.85048	NA		2.69296	NA
ENSCAFG00000002174	GADD45G	-2.29862	8.65132e-05		-2.3538	0.000579554		-2.3509	5.61972e-05
ENSCAFG00000002175	EXOC1	0.229472	0.630985		-0.0651934	0.875047		0.904984	0.0750941
ENSCAFG00000002179	Sem1	0.571632	0.108141		0.553455	0.142538		0.641908	0.229872
ENSCAFG00000002180	SEMA4D	0.40604	0.373049		0.291111	0.56915		1.33954	0.00207824
ENSCAFG00000002182	ENSCAFG00000002182	0.342984	0.690339		0.589468	0.453028		-0.948028	0.433915
ENSCAFG00000002183	IL17F	-0.290748	0.931442		0.343587	0.912899		-3.58785	NA
ENSCAFG00000002184	ENSCAFG00000002184	2.84375	0.0010169		2.86161	0.000917523		3.79912	0.0121596
ENSCAFG00000002187	DLX6	3.22391	0.138606		3.1316	0.108745		3.38812	NA
ENSCAFG00000002188	SECISBP2	0.223699	0.442468		0.13783	0.657393		0.536278	0.269716
ENSCAFG00000002189	CEP135	-0.402762	0.437455		-0.31345	0.577561		-0.922751	0.11839
ENSCAFG00000002190	RFX8	-3.06894	0.0120887		-3.02076	0.00869777		-3.37262	0.107759
ENSCAFG00000002191	DLX5	5.81852	1.10015e-07		5.85637	2.21336e-09		7.21543	0.000240043
ENSCAFG00000002193	RNF149	1.25315	0.0075389		1.07413	0.0246668		2.8521	1.34452e-08
ENSCAFG00000002194	CKS2	0.985464	0.078449		1.13438	0.044975		0.572648	0.61472
ENSCAFG00000002195	SDHAF3	0.349821	0.532412		0.13834	0.817145		0.94205	0.240589
ENSCAFG00000002196	MCM3	0.733478	0.126699		0.982513	0.00979096		-0.416239	0.6359
ENSCAFG00000002199	CNOT11	0.534154	0.00738942		0.508374	0.0120371		0.589288	0.211801
ENSCAFG00000002200	ENSCAFG00000002200	0.145885	NA		0.00675677	NA		0.798253	NA
ENSCAFG00000002201	SHC3	-0.480739	0.572599		-0.398383	0.670037		-1.14586	0.366535
ENSCAFG00000002202	KIAA1211	1.09665	0.309036		0.517893	0.595744		2.48221	0.0632757
ENSCAFG00000002203	CREB3	-0.659267	0.00193095		-0.609421	0.0101448		-0.847673	0.0451517
ENSCAFG00000002204	S1PR3	-3.74263	1.46114e-18		-3.86384	3.11677e-19		-3.716	3.28906e-07
ENSCAFG00000002206	TBC1D8	-0.200032	0.623991		-0.301215	0.352931		0.385842	0.590555
ENSCAFG00000002207	TAC1	1.09192	0.540983		-0.826935	0.67923		1.52866	0.348322
ENSCAFG00000002208	SPIN1	-0.375836	0.0209102		-0.382847	0.0244754		-0.418619	0.250013
ENSCAFG00000002209	AASDH	-0.0437289	0.944781		0.0392822	0.9482		-0.29336	0.717733
ENSCAFG00000002210	EFHC1	-1.24754	0.0195593		-1.36584	0.0143016		-0.817257	0.350717
ENSCAFG00000002212	CDK20	0.162535	0.673883		0.0852838	0.839531		0.340531	0.531638
ENSCAFG00000002214	TRAM2	-1.26558	0.000229689		-1.24856	0.0014178		-1.44507	0.00221462
ENSCAFG00000002215	RPL31	0.693437	0.265961		0.791173	0.247389		0.231852	0.844854
ENSCAFG00000002216	Fbxw17	-0.0908175	0.785771		-0.128813	0.723448		0.0121889	0.984822
ENSCAFG00000002217	PPAT	0.92917	0.000369612		1.04795	9.45648e-06		0.410153	0.369209
ENSCAFG00000002218	NUTM2F	0.245853	NA		0.160456	NA		0.544292	NA
ENSCAFG00000002220	TMEM14A	-0.15093	0.724853		-0.311875	0.269513		0.122832	0.884672
ENSCAFG00000002222	ASNS	1.24626	NA		1.16249	NA		0.961429	0.434169
ENSCAFG00000002223	NPAS2	-0.190402	0.795776		0.0388018	0.956068		-1.23999	0.126329
ENSCAFG00000002224	ZNF169	-0.35066	0.127136		-0.479607	0.00350082		-0.0227987	0.969512
ENSCAFG00000002225	RGP1	-0.415797	0.261198		-0.299185	0.333788		-0.991567	0.120569
ENSCAFG00000002226	PDCL3	-0.929327	0.00016389		-0.819965	0.000647683		-1.49832	6.03647e-05
ENSCAFG00000002227	C1GALT1	2.02638	9.37487e-06		1.90317	7.33345e-05		2.90975	3.74176e-05
ENSCAFG00000002228	ENSCAFG00000002228	-0.757804	0.683028		-1.50314	NA		0.361938	NA
ENSCAFG00000002229	PTPDC1	-0.327585	0.514705		-0.398866	0.445754		-0.540646	0.399699
ENSCAFG00000002230	Gm10639	0.856613	0.455045		1.01227	0.315112		0.688583	0.676677
ENSCAFG00000002233	NPR2	-4.14743	5.99849e-14		-4.16276	2.98069e-12		-4.54285	1.50303e-09
ENSCAFG00000002234	BARX1	-0.10783	NA		0.104434	NA		-1.13882	NA
ENSCAFG00000002235	CHST10	0.21745	0.69481		0.298129	0.572291		-0.120962	0.886463
ENSCAFG00000002236	PAICS	0.90104	9.86827e-05		0.961617	0.000167739		0.704106	0.0973498
ENSCAFG00000002237	ENSCAFG00000002237	0.414911	0.454393		0.335806	0.545973		0.710282	0.373925
ENSCAFG00000002238	MIOS	0.172796	0.735573		-0.0484028	0.923206		0.669294	0.212429
ENSCAFG00000002239	LONRF2	-1.85521	0.043019		-1.44301	0.0845736		-3.70046	0.000216763
ENSCAFG00000002240	HINT2	-0.314413	0.548393		-0.448679	0.284895		0.211426	0.85089
ENSCAFG00000002241	ENSCAFG00000002241	-0.385219	0.691701		-0.171498	0.869756		-1.37722	0.423764
ENSCAFG00000002242	FAM221B	-2.74922	3.68181e-05		-2.77414	0.000210164		-2.74401	0.0182101
ENSCAFG00000002244	SRP72	0.0935796	0.747289		0.119497	0.708307		-0.137516	0.762545
ENSCAFG00000002246	GLCCI1	-0.597213	0.313566		-0.830499	0.092595		0.361604	0.68537
ENSCAFG00000002248	ARL9	-4.99001	3.88617e-15		-4.9036	1.44214e-13		-5.49314	5.03174e-07
ENSCAFG00000002250	TMEM8B	-1.96141	3.06551e-06		-1.99446	4.46136e-05		-2.07268	0.00529075
ENSCAFG00000002253	PHF2	0.270138	0.186885		0.23215	0.322517		0.433136	0.178797
ENSCAFG00000002254	REST	0.378765	0.377478		0.321986	0.45893		0.72162	0.257738
ENSCAFG00000002255	ICK	-0.855606	0.0327286		-0.660969	0.0786578		-1.71986	0.00386836
ENSCAFG00000002256	NOA1	0.883437	0.00725676		0.821853	0.0177459		1.24027	0.0539537
ENSCAFG00000002257	ICA1	2.37735	9.23019e-12		2.30137	9.26489e-10		3.09063	5.41135e-11
ENSCAFG00000002260	REV1	-0.194182	0.304356		-0.181939	0.31915		-0.368753	0.380877
ENSCAFG00000002261	FAM120A	0.269184	0.292295		0.334036	0.18797		0.0331506	0.951322
ENSCAFG00000002264	FBXO9	-0.634507	0.0178946		-0.679568	0.0224278		-0.584809	0.183636
ENSCAFG00000002266	WNK2	3.77446	1.95117e-07		4.25849	7.7588e-15		1.08299	0.273776
ENSCAFG00000002270	NINJ1	0.0948689	0.864394		0.257601	0.575272		-0.481838	0.43728
ENSCAFG00000002271	PHF14	0.267635	0.322728		0.186837	0.499936		0.475702	0.226473
ENSCAFG00000002273	GCM1	-0.402278	0.828551		-0.439172	0.833878		2.1771	NA
ENSCAFG00000002275	CARD19	-0.134789	0.758957		-0.235837	0.582797		0.593687	0.220359
ENSCAFG00000002276	ELOVL5	-0.522832	0.499687		-0.29063	0.717168		-1.57055	0.07149
ENSCAFG00000002277	SUSD3	1.37571	0.17214		1.0713	0.304788		3.29845	0.0112119
ENSCAFG00000002278	EIF5B	0.27576	0.468686		0.446747	0.11382		-0.46952	0.345214
ENSCAFG00000002280	THSD7A	-4.54668	2.08384e-11		-4.54444	1.56937e-11		-4.89468	5.70716e-08
ENSCAFG00000002281	RECK	-3.60326	6.2345e-14		-3.50329	9.29597e-14		-3.98195	4.49384e-06
ENSCAFG00000002283	FGD3	1.34838	0.179689		0.938343	0.35156		4.03034	0.000519191
ENSCAFG00000002285	ENSCAFG00000002285	0.00702026	NA		0.0795949	NA		-0.177064	NA
ENSCAFG00000002286	CCIN	-2.61562	NA		-2.73114	NA		-3.13008	NA
ENSCAFG00000002287	TXNDC9	-0.0475	0.869144		-0.0122931	0.972056		-0.24234	0.601179
ENSCAFG00000002288	GCLC	1.94097	7.35717e-05		1.78743	0.000177997		2.86503	1.37184e-05
ENSCAFG00000002289	BICD2	-0.612816	0.0093533		-0.509073	0.0252685		-1.14019	0.0026944
ENSCAFG00000002290	ENSCAFG00000002290	0.722206	0.463811		0.755887	0.475887		0.558694	0.698007
ENSCAFG00000002291	LYG1	1.6151	NA		1.10731	NA		2.88621	NA
ENSCAFG00000002292	CLTA	0.64042	0.0774282		0.714971	0.0338374		0.616953	0.321006
ENSCAFG00000002293	IPPK	0.689884	0.0482321		0.6047	0.086809		1.04505	0.150744
ENSCAFG00000002294	MITD1	0.128874	0.763785		0.0107583	0.9814		0.663097	0.288428
ENSCAFG00000002296	POLR2B	-0.358545	0.200156		-0.354649	0.268557		-0.217812	0.718776
ENSCAFG00000002297	LIPT1	0.0664106	0.870171		0.119386	0.771675		-0.0961992	0.9066
ENSCAFG00000002300	KLHL31	-1.80565	0.00034839		-1.85539	0.00137522		-2.1094	0.00206259
ENSCAFG00000002301	ECM2	-4.7544	6.11142e-30		-4.69297	3.54488e-26		-4.84052	6.82594e-12
ENSCAFG00000002304	GNE	0.502269	0.47647		0.830857	0.118231		-1.20099	0.15941
ENSCAFG00000002305	LRRC1	0.803106	0.150682		0.709658	0.224115		1.74786	0.0155617
ENSCAFG00000002306	TMEM106B	0.122055	0.76457		-0.00178787	0.997026		0.422924	0.444478
ENSCAFG00000002307	ASPN	-4.12867	1.10553e-11		-4.08535	4.52871e-18		-4.36303	0.000611705
ENSCAFG00000002308	VWDE	-3.02258	7.40664e-05		-3.56008	3.88714e-06		-2.08424	0.0293405
ENSCAFG00000002309	OMD	-5.10283	4.95134e-07		-4.85256	5.15361e-06		-6.7003	8.43504e-12
ENSCAFG00000002310	TSGA10	1.35558	0.000195891		1.32609	0.000978029		2.10069	1.15127e-05
ENSCAFG00000002313	OGN	-4.06596	2.95162e-15		-3.95863	4.61154e-23		-4.24766	2.69093e-05
ENSCAFG00000002315	RNF38	-1.06633	0.031919		-0.860778	0.0578474		-2.01266	0.00145649
ENSCAFG00000002316	MLIP	-2.6675	0.357729		-3.72495	NA		-1.47945	0.64266
ENSCAFG00000002317	ENSCAFG00000002317	-0.0144103	NA		-0.943833	NA		2.94371	NA
ENSCAFG00000002318	ARL4A	-1.8605	0.00162396		-2.37687	1.44187e-08		-0.896482	0.37572
ENSCAFG00000002319	KIAA1211L	0.201142	0.775754		0.0712931	0.928379		1.16075	0.0659891
ENSCAFG00000002323	MGAT4A	1.07744	0.0365155		0.957304	0.0798128		1.96436	0.00531212
ENSCAFG00000002324	NOL8	0.154838	0.406182		0.21754	0.215082		-0.0230083	0.959065
ENSCAFG00000002327	FAM83B	0.403467	0.784318		-0.194584	0.898937		2.2408	0.108722
ENSCAFG00000002328	HCRTR2	-3.24438	NA		-3.18831	NA		-1.94187	NA
ENSCAFG00000002329	COA5	-0.849571	0.0217993		-0.921911	0.0168357		-0.576134	0.472544
ENSCAFG00000002330	IGFBP7	-1.11799	0.0147932		-1.05249	0.017958		-1.06006	0.239659
ENSCAFG00000002331	GFRAL	-1.62422	NA		-1.66714	NA		-1.13884	NA
ENSCAFG00000002332	ENSCAFG00000002332	1.12123	0.157438		1.13958	0.214353		1.02289	0.558208
ENSCAFG00000002333	ENSCAFG00000002333	-0.148488	0.858719		-0.10851	0.90292		-0.273217	0.843056
ENSCAFG00000002334	MELK	1.62412	0.0420173		1.95969	0.00753788		-0.208957	0.912581
ENSCAFG00000002336	ENSCAFG00000002336	0.808282	0.166506		0.709829	0.224176		2.08647	0.00741872
ENSCAFG00000002337	ENSCAFG00000002337	1.81664	0.0484509		1.7302	0.0795335		3.22385	0.0332618
ENSCAFG00000002340	IARS	-0.381687	0.309557		-0.241786	0.559592		-1.11742	0.00671494
ENSCAFG00000002341	HMGCLL1	-2.89651	0.000209932		-3.24483	1.15175e-05		-1.25168	0.376485
ENSCAFG00000002342	ETV1	1.29164	0.234345		1.5467	0.116554		-0.579057	0.620571
ENSCAFG00000002344	INPP4A	-0.294149	0.394224		-0.245265	0.527441		-0.518636	0.322973
ENSCAFG00000002345	BMP5	-2.81066	0.000258113		-3.11685	2.95626e-05		-1.31336	0.383494
ENSCAFG00000002346	MFSD14B	0.571569	0.0589684		0.667638	0.0110459		0.30222	0.670941
ENSCAFG00000002348	COL21A1	0.201402	0.858986		0.436688	0.653803		-0.89446	0.565134
ENSCAFG00000002349	UBE2M	0.220894	0.613748		0.122576	0.775419		0.338357	0.650339
ENSCAFG00000002350	ENSCAFG00000002350	-1.57205	0.000518699		-1.47193	0.00212372		-1.91934	0.0245389
ENSCAFG00000002351	ENSCAFG00000002351	0.17883	0.839512		0.353499	0.637367		-0.30441	0.852075
ENSCAFG00000002352	CHMP2A	-0.0881245	0.833885		-0.146709	0.682048		0.287523	0.719972
ENSCAFG00000002354	TRIM28	0.439359	0.115952		0.504658	0.0678667		0.168167	0.781706
ENSCAFG00000002356	ZBTB45	-0.592205	0.0406238		-0.552936	0.0912934		-0.815856	0.189028
ENSCAFG00000002357	PAX5	-1.97036	0.368849		-1.94755	0.437811		-0.71851	NA
ENSCAFG00000002358	VWA3B	-2.5629	0.0499063		-2.99112	0.0132479		0.934924	0.608426
ENSCAFG00000002360	ZNF324	-0.909865	0.0154441		-1.02585	0.00564837		-0.838906	0.300458
ENSCAFG00000002361	ZNF584	0.0345032	0.951932		-0.0189688	0.976224		0.76987	0.31168
ENSCAFG00000002363	RNF225	2.63789	0.0928599		2.52456	0.114578		5.04932	0.0951107
ENSCAFG00000002364	ADGRL3	1.38867	0.112129		1.04244	0.247788		3.11501	0.00192169
ENSCAFG00000002365	TMEM131	-0.262214	0.410791		-0.21696	0.550687		-0.497844	0.356498
ENSCAFG00000002366	RPS5	0.750058	0.122295		0.875324	0.0873557		0.420904	0.232999
ENSCAFG00000002367	A1BG	0.273424	0.739889		0.293556	0.737184		1.07708	0.267787
ENSCAFG00000002370	GRHPR	0.970129	0.00545823		0.986219	0.00462307		0.992012	0.132235
ENSCAFG00000002371	ZAP70	-2.69831	0.00404003		-3.2056	0.000114447		0.610886	0.452875
ENSCAFG00000002372	ZNF135	-0.233411	0.402287		-0.307728	0.236158		0.175412	0.734863
ENSCAFG00000002375	ENSCAFG00000002375	-1.69419	0.185031		-2.92017	1.50824e-06		2.92123	4.79133e-05
ENSCAFG00000002377	POLR1E	-0.201048	0.679954		0.0132839	0.973744		-1.16074	0.0140975
ENSCAFG00000002380	ACTR1B	-1.37624	1.35621e-05		-1.30446	0.000153336		-1.91445	1.23999e-05
ENSCAFG00000002382	FBXO10	-0.708479	0.335242		-0.266611	0.694809		-2.82623	2.88179e-05
ENSCAFG00000002386	FRMPD1	-1.43521	0.132761		-2.03057	0.0084224		1.09109	0.192227
ENSCAFG00000002387	COX5B	0.683428	0.14763		0.574372	0.212113		0.898657	0.226024
ENSCAFG00000002390	FAM178B	-3.39692	8.1551e-08		-3.7245	2.72959e-09		-2.60989	0.0137033
ENSCAFG00000002391	EXOSC3	-0.0129854	0.97522		-0.0288135	0.9401		0.0993775	0.900062
ENSCAFG00000002392	ZSCAN18	-3.14755	2.61801e-05		-4.30306	5.94665e-21		-1.62357	0.00586703
ENSCAFG00000002393	SEMA4C	-0.395574	0.484387		-0.538485	0.259933		0.089	0.937234
ENSCAFG00000002394	DCAF10	-0.674942	0.0853179		-0.518069	0.173709		-1.36921	0.00442872
ENSCAFG00000002395	SLC25A51	-0.198373	0.631215		-0.14523	0.711411		-0.517295	0.444369
ENSCAFG00000002396	ANKRD39	0.141341	0.642211		0.14079	0.671803		0.0746751	0.90627
ENSCAFG00000002397	SHB	1.03613	0.003218		1.1293	9.68201e-05		0.813176	0.271324
ENSCAFG00000002399	ENSCAFG00000002399	-0.0423119	0.977938		0.0846702	0.956941		-0.410024	NA
ENSCAFG00000002400	ALDH1B1	-1.70282	0.035349		-1.51006	0.0794092		-2.44812	0.0324628
ENSCAFG00000002402	DGKB	-6.99574	6.07421e-08		-8.06285	2.52434e-08		-6.97156	6.1107e-07
ENSCAFG00000002403	CCDC180	-0.399552	0.697166		-0.348673	0.75578		0.277459	0.812333
ENSCAFG00000002404	CNNM4	0.516734	0.445779		0.859648	0.0910671		-1.14817	0.0615405
ENSCAFG00000002406	LMAN2L	0.130273	0.732678		-0.00271744	0.994957		0.407839	0.497356
ENSCAFG00000002408	ENSCAFG00000002408	-0.171513	0.919214		-1.33329	0.294111		0.83135	0.589773
ENSCAFG00000002409	ENSCAFG00000002409	2.22041	0.215007		2.15396	0.214044		1.68217	NA
ENSCAFG00000002410	ENSCAFG00000002410	0.00401672	NA		0.0978358	NA		-1.13882	NA
ENSCAFG00000002411	FER1L5	-0.348484	0.478884		-0.437018	0.337342		-0.246121	0.8264
ENSCAFG00000002412	ZNF154	-0.426624	0.506706		-0.656	0.284683		0.271375	0.685185
ENSCAFG00000002413	DST	-3.05912	2.51772e-08		-2.8102	3.53128e-07		-4.18638	5.41135e-11
ENSCAFG00000002414	AGMO	-4.22962	0.00107566		-4.19909	0.000353594		-3.28592	0.0656886
ENSCAFG00000002416	TDRD7	-0.154259	0.802542		-0.226226	0.731455		0.582246	0.167886
ENSCAFG00000002420	MEOX2	-4.4334	6.29898e-08		-4.65015	4.15975e-09		-4.03228	0.00212933
ENSCAFG00000002421	ZNF550	-1.28544	0.0467796		-1.28152	0.0616459		-1.35864	0.11281
ENSCAFG00000002424	BZW2	0.0480787	0.926827		0.0183802	0.975289		-0.17127	0.751785
ENSCAFG00000002425	KANSL3	-0.331295	0.220043		-0.378006	0.158466		-0.343413	0.525932
ENSCAFG00000002426	SOSTDC1	-6.37048	3.08085e-18		-5.9544	4.6088e-17		-8.44885	1.3355e-10
ENSCAFG00000002427	TMOD1	-4.06066	0.000418345		-3.58858	4.08309e-05		-9.16381	7.04849e-22
ENSCAFG00000002428	ANKMY2	0.0802568	0.8525		0.0372231	0.94107		0.150808	0.770624
ENSCAFG00000002432	TSPAN13	1.81702	0.0147104		1.68681	0.0387689		3.92198	5.20083e-07
ENSCAFG00000002433	OXER1	3.41505	0.0224707		3.72243	0.0055314		1.97606	NA
ENSCAFG00000002435	HAAO	1.39378	0.202512		0.442597	0.642721		3.48973	0.00303058
ENSCAFG00000002437	AGR2	4.94222	1.00842e-11		5.11862	2.65527e-13		4.42816	1.53116e-09
ENSCAFG00000002439	TSTD2	-0.412779	0.277422		-0.334179	0.362823		-0.70504	0.216769
ENSCAFG00000002440	ENSCAFG00000002440	-0.321142	0.667782		-0.531348	0.397959		-0.32928	0.812755
ENSCAFG00000002441	Zim1	-3.81461	0.0147838		-4.40266	0.00327406		0.491273	0.846352
ENSCAFG00000002445	NCBP1	0.300929	0.135795		0.385512	0.0234558		-0.0008025	0.998805
ENSCAFG00000002447	BEND6	-3.83216	4.36394e-08		-3.43452	4.986e-07		-5.41331	4.47799e-08
ENSCAFG00000002448	AHR	1.11648	0.129321		0.806003	0.274689		2.60936	NA
ENSCAFG00000002451	ZNF451	-0.417258	0.185959		-0.44581	0.187347		-0.363144	0.454499
ENSCAFG00000002452	ENSCAFG00000002452	0.607234	0.696757		0.582666	0.724243		0.924175	NA
ENSCAFG00000002454	XPA	-0.36971	0.136358		-0.375366	0.12167		-0.3271	0.567761
ENSCAFG00000002455	ENSCAFG00000002455	0.0358293	0.948714		0.0423184	0.938537		-0.275136	0.75717
ENSCAFG00000002456	ZNF268	-0.299289	0.656596		-0.542916	0.351146		0.28946	0.727554
ENSCAFG00000002459	RAB23	-1.80807	9.45475e-05		-1.4899	0.000822176		-3.21513	2.06991e-16
ENSCAFG00000002460	TRMO	-0.824011	0.00504216		-0.893649	0.00340732		-0.318664	0.654947
ENSCAFG00000002461	HEMGN	0.385875	0.889705		-0.978739	NA		5.7847	0.00970973
ENSCAFG00000002463	THADA	0.447338	0.108963		0.508828	0.0822165		0.13213	0.825717
ENSCAFG00000002464	ANP32B	-0.129746	0.747837		0.0414249	0.898979		-0.858198	0.0797571
ENSCAFG00000002465	ENSCAFG00000002465	0.264482	NA		0.455674	NA		-0.417503	NA
ENSCAFG00000002467	SNX13	-0.109936	0.871639		-0.357584	0.519478		0.369019	0.60879
ENSCAFG00000002469	NANS	1.11025	0.0195166		1.14021	0.0241868		1.21231	0.203458
ENSCAFG00000002470	KHDRBS2	1.39551	NA		0.188473	NA		3.16594	NA
ENSCAFG00000002471	TRIM14	1.51976	0.00803961		1.55214	0.0172737		2.00567	0.00112967
ENSCAFG00000002473	ENSCAFG00000002473	0.894338	0.503091		0.901677	0.49811		1.7569	NA
ENSCAFG00000002476	ENSCAFG00000002476	-2.39397	0.121844		-3.45793	0.00412623		-0.258176	0.913634
ENSCAFG00000002477	CORO2A	0.678239	0.317714		0.805855	0.225134		0.413366	0.662805
ENSCAFG00000002479	ZNF667	-0.66285	0.193862		-0.925818	0.0359836		0.246136	0.803913
ENSCAFG00000002481	ZNF787	0.368793	0.474302		0.183002	0.720119		1.082	0.0992375
ENSCAFG00000002482	LGSN	-0.879751	NA		-1.05145	NA		-0.417496	NA
ENSCAFG00000002483	TBC1D2	1.2099	0.0333402		1.29693	0.0315846		1.72742	0.0143837
ENSCAFG00000002487	GABBR2	0.636462	0.630984		1.03042	0.262233		-3.69269	0.000134323
ENSCAFG00000002489	PLEKHH2	-3.50827	1.24635e-09		-3.31738	9.8385e-08		-4.45037	1.61435e-10
ENSCAFG00000002490	PTP4A1	-0.673096	0.23085		-0.424515	0.472454		-1.79242	0.00787157
ENSCAFG00000002491	Lao1	1.85259	NA		1.91264	NA		1.34972	NA
ENSCAFG00000002492	ANKS6	-0.981163	0.0178243		-0.905246	0.0518812		-1.44849	0.00014777
ENSCAFG00000002493	PHF3	-0.456473	0.0632181		-0.362156	0.131533		-0.7743	0.0268062
ENSCAFG00000002494	GALNT12	-0.276923	0.718501		-0.184386	0.834737		-0.232493	0.678918
ENSCAFG00000002495	EYS	-0.616487	0.380209		-0.860414	0.25197		-0.0857539	0.943792
ENSCAFG00000002498	HDAC9	-4.54299	1.41866e-13		-4.92508	1.72068e-14		-4.54001	3.31281e-07
ENSCAFG00000002499	DYNC2LI1	0.369685	0.633164		0.0107785	0.990068		0.904733	0.346409
ENSCAFG00000002500	SLC2A1	2.19707	5.79721e-07		2.22768	2.6771e-06		2.36152	0.00692252
ENSCAFG00000002501	NLRP5	-0.53598	NA		-0.427818	NA		-1.13882	NA
ENSCAFG00000002504	ABCG5	-1.16339	0.589022		-2.32407	NA		0.921913	0.699199
ENSCAFG00000002505	ZNF691	-0.75965	0.0114878		-0.82154	0.0126324		-0.507425	0.451336
ENSCAFG00000002506	FERD3L	-0.442902	NA		-0.651919	NA		0.544279	NA
ENSCAFG00000002508	ENSCAFG00000002508	1.29361	0.443184		1.40875	0.377816		1.72266	NA
ENSCAFG00000002509	ERMAP	-1.23444	NA		-1.0757	NA		-1.13884	NA
ENSCAFG00000002511	TWISTNB	0.650454	0.00449384		0.577055	0.0191106		0.805272	0.0490367
ENSCAFG00000002512	SVBP	-0.38632	0.413619		-0.663936	0.101621		-0.0313174	0.968577
ENSCAFG00000002513	TMEM196	1.36263	NA		1.45063	NA		1.0143	NA
ENSCAFG00000002514	TMEM269	0.320332	NA		0.384574	NA		-0.417483	NA
ENSCAFG00000002515	MACC1	2.53652	6.04384e-05		2.47112	0.000223445		3.39432	0.00219519
ENSCAFG00000002516	C1orf50	0.290629	0.634405		0.0744759	0.893451		0.793595	0.432908
ENSCAFG00000002517	ENSCAFG00000002517	-0.519131	0.289501		-0.393036	0.417669		-0.909192	0.199296
ENSCAFG00000002518	ABCG8	0.742109	NA		0.0721057	NA		2.06546	NA
ENSCAFG00000002519	ITGB8	-0.107782	0.94087		-0.399524	0.770331		0.114129	0.944436
ENSCAFG00000002520	NLRP13	0.506468	NA		0.692708	NA		NA	NA
ENSCAFG00000002523	ENSCAFG00000002523	-0.877773	0.447175		-1.01255	0.402741		-1.03411	0.682205
ENSCAFG00000002524	RFPL4A	1.88336	0.309079		1.20541	NA		2.84783	NA
ENSCAFG00000002525	COL15A1	-2.39498	0.000850477		-2.11498	0.00206412		-3.61313	0.000369136
ENSCAFG00000002526	P3H1	-1.54885	3.98856e-07		-1.53404	2.32444e-06		-1.76609	0.000313348
ENSCAFG00000002527	LRPPRC	0.0856697	0.77406		0.10033	0.755383		-0.194785	0.621163
ENSCAFG00000002528	TGFBR1	-1.01139	0.0302111		-0.810908	0.076524		-1.89477	0.000393285
ENSCAFG00000002531	EPN1	1.15624	0.000640414		1.07009	0.00102451		1.69475	0.00223194
ENSCAFG00000002532	ALG2	-0.0688501	0.883165		-0.0827942	0.869756		0.074307	0.934105
ENSCAFG00000002533	SEC61B	-0.126748	0.776618		-0.0797601	0.872358		-0.0552621	0.937667
ENSCAFG00000002535	PPM1B	-0.226704	0.364964		-0.175488	0.511158		-0.452033	0.31168
ENSCAFG00000002538	SLC3A1	-0.67561	0.0295526		-0.742206	0.0242395		-0.627659	0.251648
ENSCAFG00000002539	STX17	-0.0600478	0.943668		0.0431209	0.954494		-0.551591	0.61884
ENSCAFG00000002540	CLDN19	-2.29509	0.319835		-3.69675	0.0832616		-1.56349	0.538163
ENSCAFG00000002541	YBX1	0.399305	0.413035		0.617691	0.167893		-0.610269	0.167213
ENSCAFG00000002542	ERP44	0.537267	0.130226		0.509182	0.173709		1.01553	0.0500574
ENSCAFG00000002543	PREPL	-0.907548	0.0175835		-0.993275	0.017305		-1.01862	0.0270089
ENSCAFG00000002544	PPIH	0.760725	0.033054		0.831803	0.0311196		0.334505	0.55143
ENSCAFG00000002545	LMBRD1	0.83015	0.0015083		0.852289	0.00322664		0.821082	0.0294389
ENSCAFG00000002546	CAMKMT	-0.411371	0.139144		-0.436964	0.102246		-0.528244	0.428593
ENSCAFG00000002548	ENSCAFG00000002548	-0.31905	0.831571		-0.269163	0.869089		-0.285123	0.908646
ENSCAFG00000002549	CCDC30	-0.0465764	0.967704		-0.581407	0.51106		1.03747	0.21621
ENSCAFG00000002550	SIX2	0.421448	0.731019		0.546392	0.651179		0.368462	0.818672
ENSCAFG00000002551	U2AF2	0.492548	0.00905086		0.473954	0.0170826		0.474587	0.297499
ENSCAFG00000002552	INVS	-1.1394	0.00162731		-1.04132	0.00756223		-1.64283	0.000447723
ENSCAFG00000002553	PPCS	0.534392	0.333963		0.215155	0.694206		1.27496	0.0604801
ENSCAFG00000002554	SRBD1	0.163153	0.568466		0.242029	0.401488		-0.127802	0.74949
ENSCAFG00000002556	ZMYND12	0.580925	NA		0.160456	NA		1.85927	NA
ENSCAFG00000002557	RIMKLA	-0.165254	0.851988		-0.227774	0.802098		-0.399975	0.677735
ENSCAFG00000002558	CCDC106	-0.474306	0.256622		-0.55035	0.215204		-0.311522	0.690337
ENSCAFG00000002560	ENSCAFG00000002560	0.93026	0.328234		1.06577	0.251961		0.485963	0.802862
ENSCAFG00000002561	FIZ1	-0.117121	0.803824		-0.215467	0.586667		0.292907	0.705077
ENSCAFG00000002562	COL19A1	-8.90057	NA		-8.62943	NA		-9.9772	5.90663e-09
ENSCAFG00000002563	FOXJ3	0.188835	0.578164		0.217771	0.570659		0.0145805	0.976177
ENSCAFG00000002564	ZNF865	-0.229681	0.590345		-0.408466	0.216052		0.488528	0.447113
ENSCAFG00000002565	TEX10	0.333321	0.523338		0.551365	0.183754		-0.639944	0.120667
ENSCAFG00000002568	GUCA2A	0.266336	0.883081		0.38646	0.835182		7.56209	NA
ENSCAFG00000002572	SBK2	1.10577	NA		0.720724	NA		2.0633	NA
ENSCAFG00000002573	SSC5D	-3.31685	6.81945e-10		-3.67244	1.67104e-12		-2.67708	0.000237513
ENSCAFG00000002575	NAT14	-1.15714	0.00735862		-1.37933	0.00120439		-0.36367	0.680735
ENSCAFG00000002576	HIVEP3	-2.27625	NA		-2.31284	NA		-2.85125	0.00154721
ENSCAFG00000002577	MSANTD3-TMEFF1	-2.10075	0.000149313		-1.77903	0.000780455		-3.54002	5.70528e-06
ENSCAFG00000002579	EDN2	-0.415375	0.654933		-0.0737733	0.922707		-2.71601	0.00679402
ENSCAFG00000002580	ISOC2	0.237428	0.68446		0.0644082	0.91815		1.03365	0.087846
ENSCAFG00000002581	CAVIN4	-3.43735	7.52444e-07		-3.18538	1.05871e-06		-4.63257	0.0012138
ENSCAFG00000002585	RPL28	0.665301	0.128044		0.720081	0.119623		0.735668	0.1932
ENSCAFG00000002586	PLPPR1	1.84104	0.567387		-0.356466	NA		4.55082	0.0816152
ENSCAFG00000002587	TMEM190	-0.444665	0.827833		-0.395513	0.839593		-0.707539	NA
ENSCAFG00000002588	IL11	-1.77828	0.156468		-1.5414	0.274472		-2.84861	NA
ENSCAFG00000002589	COL9A1	-0.255541	NA		-1.55516	NA		0.68643	NA
ENSCAFG00000002590	Acnat1	0.554541	0.578059		0.252549	0.807788		2.60626	0.0733819
ENSCAFG00000002592	SCMH1	-0.168064	0.790233		-0.228906	NA		-0.0108988	0.990803
ENSCAFG00000002594	KMT5C	0.46822	0.392224		0.168397	0.734525		1.35167	0.126486
ENSCAFG00000002595	TMEM150B	1.54072	0.054132		1.00399	0.183674		3.06466	0.0039228
ENSCAFG00000002596	ZNF189	-0.441121	0.173425		-0.458546	0.145374		-0.208155	0.765488
ENSCAFG00000002598	ALDOB	1.01441	0.70458		0.00165183	NA		1.69496	NA
ENSCAFG00000002599	FAM135A	0.145029	0.804303		0.0263632	0.970676		0.748647	0.0418943
ENSCAFG00000002600	SLFNL1	0.488361	0.795398		-1.10918	0.425203		1.13732	0.618438
ENSCAFG00000002601	BRSK1	0.187877	0.865238		-1.07854	0.0602051		1.42295	0.00578529
ENSCAFG00000002602	SDHAF4	-0.363285	0.300409		-0.317198	0.43336		-0.409492	0.513538
ENSCAFG00000002603	TMEM246	-5.99824	9.32871e-20		-5.95449	5.40774e-19		-6.65954	5.81166e-15
ENSCAFG00000002604	ENSCAFG00000002604	-0.525515	0.315002		-0.492762	0.378704		-0.362474	0.71621
ENSCAFG00000002605	HSPBP1	0.377921	0.470726		0.352929	0.410619		0.381201	0.709696
ENSCAFG00000002606	ENSCAFG00000002606	0.170339	0.856357		0.405752	0.621708		-1.10084	0.436947
ENSCAFG00000002607	RNF20	-0.269524	0.432313		-0.217339	0.577776		-0.332462	0.483924
ENSCAFG00000002608	PPP6R1	0.394467	0.0757627		0.429838	0.0278209		0.206258	0.717601
ENSCAFG00000002609	TMEM86B	1.72581	0.0680785		1.116	0.231832		3.60456	0.00362745
ENSCAFG00000002610	PRKCE	-0.417859	0.289625		-0.231518	0.557618		-1.2665	0.00253274
ENSCAFG00000002611	PTPRH	0.265502	0.915916		-0.101053	NA		0.701474	NA
ENSCAFG00000002612	SMAP1	-0.0790388	0.863408		0.140824	0.625695		-1.07851	0.0182953
ENSCAFG00000002613	SYT5	-0.761105	0.584106		-1.6633	0.0810888		3.08048	0.00108227
ENSCAFG00000002614	ENSCAFG00000002614	-1.22559	0.520561		-1.01783	0.612148		-1.89618	NA
ENSCAFG00000002615	DNAAF3	-0.838916	0.267667		-1.41893	0.0107979		0.647007	0.4842
ENSCAFG00000002616	B3GAT2	-0.414741	0.555149		-0.347255	0.553748		-0.771126	0.627248
ENSCAFG00000002617	GRIN3A	-0.305635	NA		-0.493704	NA		-0.660317	NA
ENSCAFG00000002618	TNNI3	-2.25633	0.212307		-4.197	0.000140497		1.70478	0.222303
ENSCAFG00000002619	LOC474964	0.00964964	0.990393		0.101588	0.874252		-0.33861	0.811339
ENSCAFG00000002620	TNNT1	0.425981	0.855579		0.147403	0.958395		3.95463	0.0799366
ENSCAFG00000002626	PPP1R12C	-1.70045	5.08728e-07		-1.80095	1.24408e-06		-1.80194	0.0026944
ENSCAFG00000002627	EPAS1	0.168731	0.86893		0.387247	0.621235		-0.871886	0.491263
ENSCAFG00000002628	EPS8L1	2.95651	1.52515e-06		2.76591	2.08734e-06		4.8464	5.53449e-09
ENSCAFG00000002630	ATP6V1E2	0.599546	NA		0.468606	NA		0.544292	NA
ENSCAFG00000002631	RHOQ	-1.27029	0.00995038		-1.39168	0.00855948		-1.5091	0.0133182
ENSCAFG00000002632	PIGF	-0.203312	0.711181		-0.444159	0.344561		0.0875604	0.913222
ENSCAFG00000002633	CRIPT	0.180971	0.689167		0.117853	0.816485		0.374831	0.639335
ENSCAFG00000002634	SOCS5	-0.410534	0.184913		-0.26285	0.3675		-1.09505	0.00256538
ENSCAFG00000002635	RDH13	0.72197	0.116194		0.587063	0.0977709		1.05945	0.239553
ENSCAFG00000002638	NLRP2	0.43201	NA		0.468606	NA		NA	NA
ENSCAFG00000002640	RIMS1	-2.44907	2.36699e-08		-2.39732	8.20722e-07		-2.80426	8.73468e-08
ENSCAFG00000002641	TTC7A	0.401542	0.562572		0.604914	0.319826		-0.475019	0.617043
ENSCAFG00000002645	KCNQ5	-6.69332	4.20909e-16		-6.49752	2.63628e-13		-7.73097	5.63785e-11
ENSCAFG00000002646	ENSCAFG00000002646	-0.771958	0.0941877		-0.596757	0.228404		-1.61022	0.0205786
ENSCAFG00000002649	LENG8	-0.312786	0.633119		-0.618008	0.308579		-0.130432	0.872547
ENSCAFG00000002652	RPS9	0.435912	0.334943		0.500715	0.309977		0.459728	0.266503
ENSCAFG00000002653	EPCAM	2.63221	3.88143e-05		2.67561	0.000233279		3.71201	0.000157055
ENSCAFG00000002654	ABCB5	1.60039	0.771713		1.25023	NA		22.0325	NA
ENSCAFG00000002655	MTO1	-0.308057	0.274384		-0.206363	0.49502		-0.772822	0.0379948
ENSCAFG00000002656	ENSCAFG00000002656	-0.340622	0.582526		-0.110609	0.872678		-1.38976	0.135286
ENSCAFG00000002657	TTYH1	-1.88715	0.122649		-2.728	0.0231958		-1.67809	0.265413
ENSCAFG00000002658	SLC17A5	-0.105289	0.794006		-0.0177354	0.959659		-0.339685	0.674843
ENSCAFG00000002659	MSH2	-0.0615934	0.898553		0.159919	0.586692		-1.06325	0.00484197
ENSCAFG00000002660	LAIR1	0.679461	0.499797		0.432257	0.679505		3.44787	0.00350185
ENSCAFG00000002661	SMC2	0.799716	0.285981		1.13896	0.0648589		-0.981859	0.384794
ENSCAFG00000002663	CD109	-0.502955	0.721983		-0.0721558	0.96719		-2.63081	0.0162153
ENSCAFG00000002664	MSH6	0.0205533	0.963742		0.215608	0.528425		-0.81094	0.0371597
ENSCAFG00000002667	ENSCAFG00000002667	-0.0657826	0.944196		0.0356057	0.969961		-0.537561	0.765488
ENSCAFG00000002669	FBXO11	0.454968	0.401518		0.64679	0.190943		-0.349326	0.369512
ENSCAFG00000002671	SP4	-0.951833	0.0169558		-1.14564	0.000822176		-0.228189	0.765529
ENSCAFG00000002675	TSEN34	0.72361	0.279577		0.608235	0.185277		1.34697	NA
ENSCAFG00000002688	PPP1R21	0.0664892	0.855633		0.210848	0.477212		-0.534968	0.128401
ENSCAFG00000002689	MBOAT7	1.61202	0.00656262		1.32642	0.000558053		3.00218	NA
ENSCAFG00000002692	GTF2A1L	-2.23171	0.000332418		-1.85919	7.92722e-05		-4.27019	3.10324e-09
ENSCAFG00000002693	ENSCAFG00000002693	2.48111	0.204252		2.38882	NA		2.69905	NA
ENSCAFG00000002694	TMC4	2.24151	0.000795304		2.0979	0.00100428		4.19639	NA
ENSCAFG00000002695	LHCGR	2.27544	0.143287		2.47062	0.0332902		-1.22609	NA
ENSCAFG00000002696	ENSCAFG00000002696	0.771815	0.62119		0.753173	0.62854		0.158967	NA
ENSCAFG00000002697	LENG1	0.00981173	0.991478		-0.330906	0.494619		1.15806	0.280027
ENSCAFG00000002698	FSHR	0.245853	NA		0.160456	NA		0.544292	NA
ENSCAFG00000002699	CNOT3	0.600988	0.12359		0.391406	0.0188371		1.14371	0.122779
[truncated: 22,512 more rows]
