# Supplementary material for: RNAseq expression patterns of canine invasive urothelial carcinoma reveal two distinct tumor clusters and shared regions of dysregulation with human bladder tumors
Source: BMC Cancer. 2020 Mar 24;20:251. doi: 10.1186/s12885-020-06737-0 (PMC7092566; doi:10.1186/s12885-020-06737-0)
Supplement: Supplementary file 4 — Additional file 4:. Table S3. Genes that are differentially expressed between BRAFV595E and BRAFwt tumors. [file 12885_2020_6737_MOESM4_ESM.xlsx]

## Sheet: SubT3
Supplemental Table 3. 398 genes that distinguish BRAFV595E and BRAFwt tumors.
GeneID	cluster	BRAFV595E log2fold change	BRAFwt log2fold change	reduced set
HSD17B6	1	-0.151693	2.45531
PNPLA3	1	-0.043485	3.69544
TMEM200A	1	-0.0185103	3.14467
CYTH4	1	-0.0697081	2.38799
TSPAN33	1	-0.299385	3.42414
SH3GL2	1	-0.0420404	3.21286	Immune response
LOC102156332	1	-1.50806	3.84523
GABRB1	1	-0.653391	4.84721
GALT	1	-0.132272	2.08208
CAPN11	1	-1.63421	2.52825	Immune response
ENPP5	1	-0.398347	2.69048
INSL6	1	-0.451123	3.72068
LOC484191	1	-1.13821	5.185
HEMGN	1	-0.978739	5.7847
NPY	1	-5.72514	5.96764	Immune response
COL9A2	1	-0.826298	2.49732
KIF12	1	-0.97811	4.07098
WHRN	1	-0.459815	1.83401
NTF4	1	-0.00344829	3.01696
GATA2	1	-0.0595222	2.51334	Immune response
DRC1	1	-0.835733	2.24052
ACAA1	1	-0.0650896	2.01551	Immune response
ENSCAFG00000004983	1	-0.762387	3.37868
ST6GALNAC2	1	-0.481224	3.43704
TRAK1	1	-0.0725569	1.35653
ENSCAFG00000005986	1	-2.63281	3.77782
PPP2R2B	1	-0.0366638	1.95363
ENSCAFG00000007045	1	-0.466024	2.47444
TNFRSF19	1	-0.536932	3.67423	Immune response
GJB6	1	-0.616921	4.08843
SLC12A6	1	-0.0728301	2.10778
HPGD	1	-0.260111	5.03689
Tdh	1	-0.545396	7.5261
FAM169A	1	-0.929476	3.65713
WBP1	1	-0.178476	1.5326
DGUOK	1	-0.117019	1.5157
TMEM64	1	-0.0264372	2.80682
NUDT18	1	-0.65897	1.73224
HERC5	1	-1.1479	4.20019	Immune response
SPTBN5	1	-0.144912	3.83231
DOK2	1	-0.257976	1.73865	Immune response
LGR4	1	-0.146101	1.54394	Immune response
LINS1	1	-0.0186607	1.42516
LSAMP	1	-0.32973	5.47811
UPK1B	1	-0.389751	4.06123
ZNF831	1	-0.122043	5.56536
PFKFB4	1	-0.286624	1.83297
UBXN11	1	-0.192098	1.44167
SYCE1	1	-1.14526	8.8338
B2M	1	-0.258656	2.79187	Immune response
LTF	1	-0.159064	3.76921	Immune response
CCR5	1	-0.36537	3.1922	Immune response
TSPAN15	1	-0.29554	2.63128
RUNDC3A	1	-0.0122867	3.35951
CFAP70	1	-0.315304	1.94196
SHC4	1	-0.565365	2.72149
LRMDA	1	-0.361478	2.91459
STK11IP	1	-0.0582073	1.49411
ZNF316	1	-0.281434	1.30962
JAKMIP1	1	-2.16697	5.30463
GLTPD2	1	-0.137148	3.66571
VMO1	1	-0.100296	4.24437
SLC16A13	1	-0.138156	2.27598
ZNF488	1	-1.05136	5.00024
CCDC189	1	-0.0513088	2.61878
SBK1	1	-0.493702	2.55877	Immune response
CRYM	1	-0.0497394	5.72186	Immune response
TDRD9	1	-0.13484	3.34732
CATSPERD	1	-0.0750553	1.78948
ZFR2	1	-0.864345	2.27364
MRPS34	1	-0.129884	1.70396
CIRBP	1	-0.10684	1.74907
ENTPD2	1	-0.0575005	4.16986	Immune response
ARHGAP45	1	-0.0621335	3.8147
SLC2A5	1	-0.239781	2.46869	Immune response
LRIF1	1	-0.126288	1.55322
ADAMTS13	1	-0.359988	2.99675	Immune response
CYP4F22	1	-0.0148751	6.76937
Il9r	1	-0.864214	3.9649	Immune response
SLC6A11	1	-1.13868	6.65326	Immune response
PCDHGA5	1	-0.656394	2.36587
MB21D1	1	-0.102539	2.95299	Immune response
GLB1L3	1	-0.155215	5.94619
TRIM22	1	-0.0800535	4.02102	Immune response
CLEC12A	1	-0.351485	3.05087
ZNF684	1	-0.105275	1.34445	Immune response
ENSCAFG00000026604	1	-0.71616	6.24766
TNNC2	1	-0.0922213	3.3916
TIMD4	1	-0.557802	2.80024
LOC111089988	1	-0.797076	1.97717
SMIM30	1	-0.0629088	1.20089
KAZALD1	1	-1.69761	3.50992
AC067968.1	1	-0.28654	2.00555
BASP1	1	-0.668213	3.56526
LRRC7	1	-0.544517	4.14092
LHFPL4	1	-0.81785	2.74862
AC008687.4	1	-0.0413834	3.99258
GLIPR1L2	1	-0.647421	5.65313
ENSCAFG00000030029	1	-0.139899	1.41604
RBM11	1	-0.535115	2.40621
CD70	1	-1.05289	4.22572	Immune response
LOC484933	1	-0.553043	2.259
XAF1	1	-0.0748333	3.60796	Immune response
ZNF677	1	-0.533551	2.02732
ENSCAFG00000033428	1	-1.0395	4.84322
ENSCAFG00000033839	1	-0.215287	3.11712
ENSCAFG00000034931	1	-0.205634	2.84378
ENSCAFG00000035163	1	-0.270124	2.26092
ENSCAFG00000038921	1	-0.0335127	4.82639
AP3S1	2	1.21159	-0.192096
MTFR2	2	1.29625	-0.159241
MTHFD1L	2	0.331906	-2.6216	Tissue development, cell cycle, cell death
LGR5	2	5.42402	-2.77152	Tissue development, cell cycle, cell death
SNX9	2	0.264836	-1.12724	Tissue development, cell cycle, cell death
SLC12A2	2	0.023116	-1.90788	Tissue development, cell cycle, cell death
SYBU	2	0.452819	-2.37976
AGPAT4	2	0.119166	-2.25871
P4HA2	2	0.0723035	-1.84067
DSCC1	2	1.35584	-0.0413411	Tissue development, cell cycle, cell death
CYB5R3	2	0.151873	-1.54804
MTSS1	2	0.0741998	-1.77049	Tissue development, cell cycle, cell death
KIF20A	2	2.10667	-0.154295	Tissue development, cell cycle, cell death
FANCC	2	0.104109	-1.54822
ANXA1	2	2.22102	-1.73071	Tissue development, cell cycle, cell death
BTBD11	2	1.13367	-0.688709
BEND4	2	3.60379	-0.598826
SPINK4	2	2.5168	-0.925528
BAG1	2	2.21827	-0.00521414	Tissue development, cell cycle, cell death
FHL2	2	1.95177	-3.67773	Tissue development, cell cycle, cell death
MELK	2	1.95969	-0.208957	Tissue development, cell cycle, cell death
GABBR2	2	1.03042	-3.69269	Tissue development, cell cycle, cell death
MSH2	2	0.159919	-1.06325	Tissue development, cell cycle, cell death
KCNQ4	2	1.38121	-2.55305
DCK	2	2.27623	-0.265187
AREG	2	3.92914	-0.368405	Tissue development, cell cycle, cell death
GJB3	2	2.85588	-1.54682
GJB5	2	2.53907	-2.37821	Tissue development, cell cycle, cell death
GPX7	2	1.51584	-0.607818
LOC606761	2	1.52953	-0.429309
VASP	2	1.5373	-0.250938	Tissue development, cell cycle, cell death
KCTD14	2	2.9532	-0.00602532
FANCD2	2	1.66842	-0.035762	Tissue development, cell cycle, cell death
KIZ	2	0.0760566	-1.62935
SAMD4B	2	0.0722094	-1.1707
LTBP1	2	0.00781073	-3.36945
SLC10A2	2	7.25141	-0.552441
PCNA	2	1.3242	-0.101308	Tissue development, cell cycle, cell death
DUSP6	2	1.66519	-0.38654	Tissue development, cell cycle, cell death
CDC25B	2	0.281462	-2.13604	Tissue development, cell cycle, cell death
ELK3	2	1.5601	-0.541049	Tissue development, cell cycle, cell death
SLCO2A1	2	0.785983	-3.05915	Tissue development, cell cycle, cell death
CD44	2	0.411831	-2.27493	Tissue development, cell cycle, cell death
LOC106557643	2	5.25686	-0.323063
PTPRJ	2	1.26629	-0.384365
ENTPD1	2	0.0240119	-3.47007
TKT	2	1.57706	-0.483945
TGM2	2	1.81391	-2.92402	Tissue development, cell cycle, cell death
ANTXR2	2	0.228145	-3.97279
SHOX2	2	2.36681	-0.919459	Tissue development, cell cycle, cell death
SEC31A	2	0.155475	-1.08354
NUP93	2	0.0766035	-1.0314	Tissue development, cell cycle, cell death
GPAT3	2	1.94759	-0.96504
ST3GAL6	2	0.501348	-2.4534
GPD2	2	1.46991	-0.792423
F2R	2	2.2504	-0.99486	Tissue development, cell cycle, cell death
ACVR1	2	0.377061	-1.86078	Tissue development, cell cycle, cell death
ENSCAFG00000010051	2	1.2049	-0.0168925
BACE2	2	2.12418	-0.386178	Tissue development, cell cycle, cell death
MBOAT1	2	1.48524	-0.350784
CHEK1	2	1.18348	-0.254633	Tissue development, cell cycle, cell death
ALDH1A3	2	4.16338	-2.13968	Tissue development, cell cycle, cell death
TMTC1	2	0.289042	-3.39564
MST1R	2	3.24945	-0.609933
B3GNT7	2	2.98036	-0.329172
FANCI	2	1.36472	-0.0459048	Tissue development, cell cycle, cell death
CLCF1	2	2.18369	-0.560755	Tissue development, cell cycle, cell death
CLIP2	2	0.0870432	-2.32342
IMPDH2	2	0.0693014	-1.11068
SH3BP4	2	0.0379635	-2.22606
ENSCAFG00000012233	2	1.31536	-0.619142
DMBT1	2	5.31175	-1.84508	Tissue development, cell cycle, cell death
CYBRD1	2	0.218725	-3.07367
QSOX1	2	1.62035	-0.881441
HAT1	2	1.41373	-0.172482
CDCA7	2	2.32897	-0.0305913
GPRC5A	2	3.06488	-1.60087
SLC16A1	2	0.123292	-3.99924
YBX3	2	0.837938	-1.45399
PLA2G4A	2	2.95455	-0.507375	Tissue development, cell cycle, cell death
OSBPL6	2	2.87379	-0.634739
SUSD2	2	3.24609	-1.48777
FANCM	2	1.90238	-0.137965	Tissue development, cell cycle, cell death
SOS2	2	0.327464	-1.08227	Tissue development, cell cycle, cell death
SEPT5	2	1.98597	-1.30661	Tissue development, cell cycle, cell death
TUBA4A	2	1.17804	-0.0994722	Tissue development, cell cycle, cell death
RAD51AP1	2	1.61024	-0.107642
CCND2	2	1.54874	-1.45573	Tissue development, cell cycle, cell death
ADSS	2	0.262307	-1.07656
MTHFD1	2	1.23713	-0.746022	Tissue development, cell cycle, cell death
MYRF	2	0.570348	-1.93556
CAPN2	2	0.306523	-2.66676	Tissue development, cell cycle, cell death
ZFP36L1	2	1.11958	-0.0725868	Tissue development, cell cycle, cell death
GCNT3	2	4.75222	-0.743258	Tissue development, cell cycle, cell death
LMNA	2	0.497469	-2.15681	Tissue development, cell cycle, cell death
FLRT2	2	2.18075	-0.498537
LDLR	2	2.94737	-0.00859347
S100A8	2	3.62578	-0.914547	Tissue development, cell cycle, cell death
SEMA7A	2	3.38577	-0.25379	Tissue development, cell cycle, cell death
PPP1R13B	2	0.413516	-1.15529	Tissue development, cell cycle, cell death
SERBP1	2	0.253074	-1.1089	Tissue development, cell cycle, cell death
MTCL1	2	1.04124	-3.51229
IMPA2	2	1.807	-0.441418
CEP76	2	1.9382	-1.0859	Tissue development, cell cycle, cell death
PSMG2	2	1.60916	-0.391186	Tissue development, cell cycle, cell death
DYM	2	0.0402404	-1.84635
ZBTB7C	2	2.19538	-0.4996
NDC1	2	1.03123	-0.0860293
LRP8	2	1.08306	-0.312208	Tissue development, cell cycle, cell death
PRRG3	2	2.96037	-0.434021
PKMYT1	2	1.39569	-0.0521425	Tissue development, cell cycle, cell death
L1CAM	2	4.03075	-1.21897
DKC1	2	1.68231	-0.500562
ERRFI1	2	0.494019	-2.05082	Tissue development, cell cycle, cell death
ENO1	2	1.36504	-0.401616
FOXC2	2	0.525367	-3.37993	Tissue development, cell cycle, cell death
OSGIN1	2	2.72437	-0.499215	Tissue development, cell cycle, cell death
CENPN	2	1.55071	-0.0590812	Tissue development, cell cycle, cell death
ADGRL4	2	3.53814	-0.814672
CBFB	2	1.09894	-0.22514
CYP4A37	2	7.56054	-0.173104
AC083841.5	2	5.02709	-1.19684
BNIP3	2	1.26134	-1.73371	Tissue development, cell cycle, cell death
FRZB	2	2.89149	-3.03132	Tissue development, cell cycle, cell death
LOC608294	2	3.31568	-0.302704
SIRPA	2	1.33764	-0.617313
cfa-mir-330	2	3.06702	-0.285937
MINPP1	2	0.153685	-1.14389	Tissue development, cell cycle, cell death
GP1BB	2	1.89186	-1.35174
S100A9	2	2.67131	-0.721399	Tissue development, cell cycle, cell death
FOXN2	2	1.15966	-0.354662	Tissue development, cell cycle, cell death
EFHD1	2	0.571486	-4.63855
Txn1	2	1.97491	-0.23243
GAL3ST1	2	4.37485	-0.876651
PEX11A	2	1.49475	-0.429612
ENSCAFG00000030498	2	1.19349	-0.775532
COL10A1	2	1.02912	-0.687745	Tissue development, cell cycle, cell death
PKP1	2	4.02219	-0.190674
ENSCAFG00000031625	2	1.0744	-0.402471
VGLL3	2	1.39085	-0.0748312
ENSCAFG00000036184	2	5.8169	-1.9925
ENSCAFG00000036285	2	4.35751	-1.19162
ENSCAFG00000037584	2	4.10093	-1.13882
ENSCAFG00000038385	2	4.66422	-0.417483
ENSCAFG00000039562	2	2.58483	-1.86486
ENSCAFG00000040275	2	2.0502	-3.09729
CAPS2	3	-3.32646	1.95144
ZNF608	3	-2.19264	0.243663
VWA7	3	-0.659331	1.59297
C4A	3	-1.66408	0.5506	Transport and membrane
SLC22A1	3	-4.70064	3.1617	Transport and membrane
SULT4A1	3	-3.44891	1.28542
TEF	3	-1.59605	0.527916
ADCY8	3	-3.15739	5.42797	Transport and membrane
LRRC6	3	-2.93064	1.03678
PLA2G6	3	-1.42827	0.324365	Transport and membrane
MB	3	-3.42012	0.926126	Transport and membrane
TMEM229A	3	-4.36443	1.81745
CFAP69	3	-2.60102	0.0672163
ENSCAFG00000002042	3	-3.82146	0.230442
SIT1	3	-2.54394	1.10614	Transport and membrane
ZAP70	3	-3.2056	0.610886	Transport and membrane
ENSCAFG00000002375	3	-2.92017	2.92123
FRMPD1	3	-2.03057	1.09109
Zim1	3	-4.40266	0.491273
BRSK1	3	-1.07854	1.42295
SYT5	3	-1.6633	3.08048	Transport and membrane
TNNI3	3	-4.197	1.70478	Transport and membrane
SNAP91	3	-2.24316	1.13712	Transport and membrane
POU6F2	3	-3.26856	0.339612
NRCAM	3	-3.32303	1.60309	Transport and membrane
HRC	3	-1.95401	0.663683	Transport and membrane
NTN5	3	-3.55211	1.98165
MSRB2	3	-1.13552	0.107274
FBXL13	3	-2.06957	0.466219
CD177	3	-2.5135	4.11732
AANAT	3	-2.33304	3.59605
VIPR2	3	-2.51338	0.719201	Transport and membrane
EOMES	3	-3.08003	1.15765
PLEKHB1	3	-2.53775	0.0287424
SYT1	3	0.22497	-2.91854	Transport and membrane
CCNA1	3	-4.37459	0.777544
HPX	3	-2.43529	3.75489	Transport and membrane
KCNG3	3	-2.56859	2.24583	Transport and membrane
LRRC56	3	-2.28068	1.38248
EFCAB1	3	-3.20119	0.214287
FAM110B	3	-1.67776	1.03225
SGCG	3	-4.06561	0.231147
TDRD12	3	-2.21931	3.17029	Transport and membrane
REEP1	3	-2.07403	0.759403	Transport and membrane
PIK3R1	3	-1.665	0.308675	Transport and membrane
MORN3	3	-1.45351	0.0225981
ASB5	3	-3.11904	1.43843
PRPF40B	3	-1.13818	0.398638
P2RY1	3	-3.70492	1.26366	Transport and membrane
FAM105A	3	-1.38264	2.32021
IQCD	3	-2.74866	0.0825351
ZHX3	3	-1.3404	0.461695
HOGA1	3	-1.26005	0.136195
SLC40A1	3	-0.582755	2.14698	Transport and membrane
MSTN	3	-5.3827	1.94832	Transport and membrane
EXD1	3	-2.0414	1.16026
PLA2R1	3	-3.30438	2.32683	Transport and membrane
CD40	3	-1.8925	1.35232	Transport and membrane
MAGEL2	3	-4.23859	0.430631
MUC15	3	-3.99959	2.74432
CFAP44	3	-3.17113	0.432265
MAP2K6	3	-1.87947	0.639526	Transport and membrane
ADGRB2	3	-1.50576	0.590094
WSCD2	3	-4.13411	1.44924
MYH7	3	-2.52912	0.88911
FCER1A	3	-4.5354	1.24891	Transport and membrane
PARP15	3	-1.71443	0.0955046
ADCY1	3	-3.58341	2.89322	Transport and membrane
ANKMY1	3	-2.94083	1.42299
THEM5	3	-2.69854	0.0414727
KCNQ2	3	-2.75302	0.0821511	Transport and membrane
EVX2	3	0.750444	-5.06581
OVOS2	3	-3.24885	3.41807
TTC12	3	-2.24709	1.20246
CCDC141	3	-3.00334	0.568309
ZC3H12C	3	-1.80675	0.203623
CPZ	3	-3.14655	0.179535
CNTNAP1	3	-3.33497	2.4997	Transport and membrane
NAALADL2	3	-0.948654	1.76862
SLC16A11	3	-3.92083	2.57186	Transport and membrane
C20H19orf57	3	-2.34748	2.51247
SLIT3	3	-2.96165	0.779473
KCNN3	3	-2.30174	1.52744	Transport and membrane
S1PR5	3	-3.21372	1.50877
ZNF396	3	-2.28035	0.181721
GM2A	3	-3.51343	1.17424	Transport and membrane
ACSM3	3	-1.40894	0.147265	Transport and membrane
KSR1	3	-1.35482	0.467683
TLE2	3	-1.98504	0.532997
PLCH2	3	-2.94754	0.0967477
CHD5	3	-1.5873	0.321712
ENSCAFG00000019771	3	-1.59077	0.325697
LPAR3	3	-2.32206	0.571674	Transport and membrane
SAMD13	3	-2.26588	0.700325
ALOX12	3	-1.84322	0.946716	Transport and membrane
ASGR2	3	-4.10189	2.15866	Transport and membrane
TF	3	-4.22377	1.90883	Transport and membrane
DPYSL5	3	-5.98515	0.210963
ENSCAFG00000025443	3	-5.51127	14.7246
TRPV6	3	-3.04347	1.68358	Transport and membrane
ENSCAFG00000028985	3	-23.155	7.02947
GDNF	3	-4.27997	0.148507	Transport and membrane
EIF5A2	3	-1.98395	0.521726	Transport and membrane
LOC102152013	3	-1.06364	0.208624
FGF9	3	-2.96536	0.689888
LOC106558999	3	-2.04967	0.888332
MYH2	3	-3.7573	1.81823
TRAM1L1	3	-1.03719	1.92844
CCDC3	3	-4.1992	0.000271869
2610008E11Rik	3	-5.0755	3.24811
WNT6	3	-3.13363	1.32555
ENSCAFG00000031334	3	-2.81564	3.20734
FABP5	3	-1.54157	2.49481
MRAP2	3	-3.59609	1.19488	Transport and membrane
GPX3	3	-2.60217	0.805786
HAVCR2	3	-1.38709	0.420316	Transport and membrane
ZNF846	3	-1.60105	0.153429
ENSCAFG00000032089	3	-2.41436	0.578663
RNF152	3	-2.96505	0.226944
LOC102157134	3	-1.58086	0.847266
LOC102156989	3	-2.25091	0.0291561
FGF10	3	-3.02706	0.833672	Transport and membrane
ENSCAFG00000032943	3	-3.95376	1.557
ENSCAFG00000033758	3	-3.68463	0.275129
ENSCAFG00000034860	3	-3.34711	0.616793
ENSCAFG00000034948	3	-1.70684	0.543181
ENSCAFG00000035238	3	-3.45972	0.966796
ENSCAFG00000036793	3	-4.39092	1.24538
ENSCAFG00000036856	3	-3.4278	0.210151
ENSCAFG00000038334	3	-1.80489	3.74948
ENSCAFG00000039030	3	-4.15637	0.986831
ENSCAFG00000039838	3	-2.13398	1.16462
ENSCAFG00000040164	3	-0.616662	1.93701
ENSCAFG00000040232	3	-3.77292	1.63381
ENSCAFG00000040777	3	-2.84462	1.11142
