# Supplementary material for: RNAseq expression patterns of canine invasive urothelial carcinoma reveal two distinct tumor clusters and shared regions of dysregulation with human bladder tumors
Source: BMC Cancer. 2020 Mar 24;20:251. doi: 10.1186/s12885-020-06737-0 (PMC7092566; doi:10.1186/s12885-020-06737-0)
Supplement: Supplementary file 8 — Additional file 8:. Table S7. Hallmark gene sets over-represented in canine iUC. [file 12885_2020_6737_MOESM8_ESM.xlsx]

## Sheet: hallmark
Additional Table 7. Hallmark gene sets over-represented in canine iUC.
	Up-regulated in BRAFV595E				Up-regulated in BRAFwt				Down-regulated in BRAFV595E				Down-regulated in BRAFwt
Gene Set Name	# Genes in Overlap (k)	k/K	FDR q-value		# Genes in Overlap (k)	k/K	FDR q-value		# Genes in Overlap (k)	k/K	FDR q-value		# Genes in Overlap (k)	k/K	FDR q-value
HALLMARK_E2F_TARGETS	52	0.26	1.36e-34
HALLMARK_MTORC1_SIGNALING	45	0.225	2.97e-27
HALLMARK_G2M_CHECKPOINT	42	0.21	2.43e-24
HALLMARK_CHOLESTEROL_HOMEOSTASIS	27	0.3649	8.3e-23		16	0.2162	2.4e-09
HALLMARK_ESTROGEN_RESPONSE_LATE	39	0.195	1.13e-21		31	0.155	4.38e-13						34	0.17	4.16e-13
HALLMARK_ESTROGEN_RESPONSE_EARLY	39	0.195	1.13e-21		28	0.14	5.87e-11		26	0.13	4.05e-07		35	0.175	8.42e-14
HALLMARK_GLYCOLYSIS	35	0.175	5.59e-18		23	0.115	1.3e-07
HALLMARK_P53_PATHWAY	33	0.165	3.02e-16		30	0.15	2.07e-12
HALLMARK_XENOBIOTIC_METABOLISM	27	0.135	2.58e-11		25	0.125	6.47e-09
HALLMARK_UV_RESPONSE_UP	24	0.1519	2.75e-11
HALLMARK_INTERFERON_ALPHA_RESPONSE					36	0.3711	9e-29
HALLMARK_INTERFERON_GAMMA_RESPONSE					48	0.24	9e-29
HALLMARK_KRAS_SIGNALING_DN					21	0.105	2.21e-06		30	0.15	2.21e-09
HALLMARK_BILE_ACID_METABOLISM					14	0.125	2.2e-05
HALLMARK_EPITHELIAL_MESENCHYMAL_TRANSITION									78	0.39	7.09e-55		67	0.335	4.34e-44
HALLMARK_MYOGENESIS									66	0.33	3.06e-41		58	0.29	1.79e-34
HALLMARK_APICAL_JUNCTION									48	0.24	2.84e-23		43	0.215	3.16e-20
HALLMARK_UV_RESPONSE_DN									38	0.2639	3.71e-20		38	0.2639	3.83e-21
HALLMARK_KRAS_SIGNALING_UP									39	0.195	7.77e-16
HALLMARK_COAGULATION									24	0.1739	5.4e-09
HALLMARK_HEDGEHOG_SIGNALING									12	0.3333	3.78e-08
HALLMARK_IL2_STAT5_SIGNALING									27	0.135	1.15e-07		31	0.155	5.64e-11
HALLMARK_MITOTIC_SPINDLE													40	0.2	9.58e-18
HALLMARK_HYPOXIA													28	0.14	5.53e-09
HALLMARK_HEME_METABOLISM													26	0.13	9.35e-08
